# Supplementary material for: Mechanism-driven interpretable modeling of hydrogen solubility in organic compounds via a hierarchical transformer
Source: Royal Society of Chemistry journal article supplement (doi:10.1039/d5ta05515f), 2025-12-08
Supplement: d5ta05515f2.xlsx [file d5ta05515f2.xlsx]

## Sheet: Sheet1
Name	T (K)	P (bar)	x	MW (g/mol)	TB (K)	PC (bar)	pc (g/mL)	ZC	w	numHacc	sa	psa_div_sa	Aldehyde	Ketone	Propyl
1,2,3,4-tetrahydronaphthalene	623.15	73.81	0.085	132.205	490	36.5	0.324	0.249	0.335	0	12	0	0	0	14
1,2,3,4-tetrahydronaphthalene	623.15	60.53	0.072	132.205	490	36.5	0.324	0.249	0.335	0	12	0	0	0	14
1,2,3,4-tetrahydronaphthalene	623.15	47.43	0.058	132.205	490	36.5	0.324	0.249	0.335	0	12	0	0	0	14
1,2,3,4-tetrahydronaphthalene	623.15	30.93	0.041	132.205	490	36.5	0.324	0.249	0.335	0	12	0	0	0	14
1,2,3,4-tetrahydronaphthalene	623.15	15.3	0.025	132.205	490	36.5	0.324	0.249	0.335	0	12	0	0	0	14
1,2,3,4-tetrahydronaphthalene	543.15	88.06	0.071	132.205	490	36.5	0.324	0.249	0.335	0	12	0	0	0	14
1,2,3,4-tetrahydronaphthalene	543.15	67.35	0.055	132.205	490	36.5	0.324	0.249	0.335	0	12	0	0	0	14
1,2,3,4-tetrahydronaphthalene	543.15	54.86	0.045	132.205	490	36.5	0.324	0.249	0.335	0	12	0	0	0	14
1,2,3,4-tetrahydronaphthalene	543.15	36.73	0.03	132.205	490	36.5	0.324	0.249	0.335	0	12	0	0	0	14
1,2,3,4-tetrahydronaphthalene	543.15	18.26	0.017	132.205	490	36.5	0.324	0.249	0.335	0	12	0	0	0	14
1,2,3,4-tetrahydronaphthalene	453.15	91.91	0.054	132.205	490	36.5	0.324	0.249	0.335	0	12	0	0	0	14
1,2,3,4-tetrahydronaphthalene	453.15	77.3	0.046	132.205	490	36.5	0.324	0.249	0.335	0	12	0	0	0	14
1,2,3,4-tetrahydronaphthalene	453.15	54.39	0.034	132.205	490	36.5	0.324	0.249	0.335	0	12	0	0	0	14
1,2,3,4-tetrahydronaphthalene	453.15	41.63	0.024	132.205	490	36.5	0.324	0.249	0.335	0	12	0	0	0	14
1,2,3,4-tetrahydronaphthalene	453.15	21.73	0.014	132.205	490	36.5	0.324	0.249	0.335	0	12	0	0	0	14
1,2,4-trimethylbenzene	295	173.3	0.0571	120.194	442.53	32.3	0.2795	0.257	0.379	0	10.8	0	0	0	0
1,2,4-trimethylbenzene	295	138.8	0.0467	120.194	442.53	32.3	0.2795	0.257	0.379	0	10.8	0	0	0	0
1,2,4-trimethylbenzene	295	104.4	0.0354	120.194	442.53	32.3	0.2795	0.257	0.379	0	10.8	0	0	0	0
1,2,4-trimethylbenzene	295	69.9	0.0248	120.194	442.53	32.3	0.2795	0.257	0.379	0	10.8	0	0	0	0
1,3-propanediol	373.15	102.2	0.009577	76.095	487.3	67.96	0.3275	0.262	0.387	2	46.46	0.870857	0	0	1
1,3-propanediol	373.15	75.8	0.007135	76.095	487.3	67.96	0.3275	0.262	0.387	2	46.46	0.870857	0	0	1
1,3-propanediol	373.15	46.07	0.004343	76.095	487.3	67.96	0.3275	0.262	0.387	2	46.46	0.870857	0	0	1
1,3-propanediol	373.15	18.77	0.001808	76.095	487.3	67.96	0.3275	0.262	0.387	2	46.46	0.870857	0	0	1
1,3-propanediol	323.15	103.2	0.007404	76.095	487.3	67.96	0.3275	0.262	0.387	2	46.46	0.870857	0	0	1
1,3-propanediol	323.15	75.3	0.005486	76.095	487.3	67.96	0.3275	0.262	0.387	2	46.46	0.870857	0	0	1
1,3-propanediol	323.15	45.19	0.003281	76.095	487.3	67.96	0.3275	0.262	0.387	2	46.46	0.870857	0	0	1
1,3-propanediol	323.15	17.06	0.00125	76.095	487.3	67.96	0.3275	0.262	0.387	2	46.46	0.870857	0	0	1
1,3-propanediol	298.15	103.1	0.006502	76.095	487.3	67.96	0.3275	0.262	0.387	2	46.46	0.870857	0	0	1
1,3-propanediol	298.15	72.6	0.004621	76.095	487.3	67.96	0.3275	0.262	0.387	2	46.46	0.870857	0	0	1
1,3-propanediol	298.15	46.74	0.00296	76.095	487.3	67.96	0.3275	0.262	0.387	2	46.46	0.870857	0	0	1
1,3-propanediol	298.15	45.07	0.002868	76.095	487.3	67.96	0.3275	0.262	0.387	2	46.46	0.870857	0	0	1
1,3-propanediol	298.15	19.3	0.001238	76.095	487.3	67.96	0.3275	0.262	0.387	2	46.46	0.870857	0	0	1
1,4-butanediol	373.15	94.2	0.01187	90.122	503.2	52.44	0.3025	0.258	0.475	2	47.66	0.84893	0	0	2
1,4-butanediol	373.15	81.3	0.01034	90.122	503.2	52.44	0.3025	0.258	0.475	2	47.66	0.84893	0	0	2
1,4-butanediol	373.15	80.3	0.01014	90.122	503.2	52.44	0.3025	0.258	0.475	2	47.66	0.84893	0	0	2
1,4-butanediol	373.15	54.7	0.006937	90.122	503.2	52.44	0.3025	0.258	0.475	2	47.66	0.84893	0	0	2
1,4-butanediol	373.15	52.5	0.006668	90.122	503.2	52.44	0.3025	0.258	0.475	2	47.66	0.84893	0	0	2
1,4-butanediol	373.15	25.29	0.003243	90.122	503.2	52.44	0.3025	0.258	0.475	2	47.66	0.84893	0	0	2
1,4-butanediol	323.15	96	0.0093	90.122	503.2	52.44	0.3025	0.258	0.475	2	47.66	0.84893	0	0	2
1,4-butanediol	323.15	64.1	0.006221	90.122	503.2	52.44	0.3025	0.258	0.475	2	47.66	0.84893	0	0	2
1,4-butanediol	323.15	62.7	0.006155	90.122	503.2	52.44	0.3025	0.258	0.475	2	47.66	0.84893	0	0	2
1,4-butanediol	323.15	50.8	0.005	90.122	503.2	52.44	0.3025	0.258	0.475	2	47.66	0.84893	0	0	2
1,4-butanediol	323.15	46.48	0.004535	90.122	503.2	52.44	0.3025	0.258	0.475	2	47.66	0.84893	0	0	2
1,4-butanediol	323.15	36.08	0.003559	90.122	503.2	52.44	0.3025	0.258	0.475	2	47.66	0.84893	0	0	2
1,4-butanediol	323.15	21.69	0.002149	90.122	503.2	52.44	0.3025	0.258	0.475	2	47.66	0.84893	0	0	2
1,4-butanediol	298.15	98.9	0.00847	90.122	503.2	52.44	0.3025	0.258	0.475	2	47.66	0.84893	0	0	2
1,4-butanediol	298.15	78.6	0.006794	90.122	503.2	52.44	0.3025	0.258	0.475	2	47.66	0.84893	0	0	2
1,4-butanediol	298.15	75.8	0.006535	90.122	503.2	52.44	0.3025	0.258	0.475	2	47.66	0.84893	0	0	2
1,4-butanediol	298.15	44.6	0.003827	90.122	503.2	52.44	0.3025	0.258	0.475	2	47.66	0.84893	0	0	2
1,4-butanediol	298.15	15.42	0.00132	90.122	503.2	52.44	0.3025	0.258	0.475	2	47.66	0.84893	0	0	2
1,4-diethylbenzene	573.15	118.86	0.15494	134.221	456.94	28.03	0.2658	0.259	0.403	0	12	0	0	0	0
1,4-diethylbenzene	573.15	96.68	0.12688	134.221	456.94	28.03	0.2658	0.259	0.403	0	12	0	0	0	0
1,4-diethylbenzene	573.15	76.81	0.1	134.221	456.94	28.03	0.2658	0.259	0.403	0	12	0	0	0	0
1,4-diethylbenzene	573.15	59.11	0.07567	134.221	456.94	28.03	0.2658	0.259	0.403	0	12	0	0	0	0
1,4-diethylbenzene	573.15	41.89	0.05078	134.221	456.94	28.03	0.2658	0.259	0.403	0	12	0	0	0	0
1,4-diethylbenzene	573.15	27.03	0.02808	134.221	456.94	28.03	0.2658	0.259	0.403	0	12	0	0	0	0
1,4-diethylbenzene	563.15	124.34	0.15494	134.221	456.94	28.03	0.2658	0.259	0.403	0	12	0	0	0	0
1,4-diethylbenzene	563.15	100.74	0.12688	134.221	456.94	28.03	0.2658	0.259	0.403	0	12	0	0	0	0
1,4-diethylbenzene	563.15	79.55	0.1	134.221	456.94	28.03	0.2658	0.259	0.403	0	12	0	0	0	0
1,4-diethylbenzene	563.15	60.82	0.07567	134.221	456.94	28.03	0.2658	0.259	0.403	0	12	0	0	0	0
1,4-diethylbenzene	563.15	42.57	0.05078	134.221	456.94	28.03	0.2658	0.259	0.403	0	12	0	0	0	0
1,4-diethylbenzene	563.15	26.79	0.02808	134.221	456.94	28.03	0.2658	0.259	0.403	0	12	0	0	0	0
1,4-diethylbenzene	553.15	129.96	0.15494	134.221	456.94	28.03	0.2658	0.259	0.403	0	12	0	0	0	0
1,4-diethylbenzene	553.15	104.91	0.12688	134.221	456.94	28.03	0.2658	0.259	0.403	0	12	0	0	0	0
1,4-diethylbenzene	553.15	82.6	0.1	134.221	456.94	28.03	0.2658	0.259	0.403	0	12	0	0	0	0
1,4-diethylbenzene	553.15	62.66	0.07567	134.221	456.94	28.03	0.2658	0.259	0.403	0	12	0	0	0	0
1,4-diethylbenzene	553.15	43.38	0.05078	134.221	456.94	28.03	0.2658	0.259	0.403	0	12	0	0	0	0
1,4-diethylbenzene	553.15	26.65	0.02808	134.221	456.94	28.03	0.2658	0.259	0.403	0	12	0	0	0	0
1,4-diethylbenzene	543.15	135.97	0.15494	134.221	456.94	28.03	0.2658	0.259	0.403	0	12	0	0	0	0
1,4-diethylbenzene	543.15	109.36	0.12688	134.221	456.94	28.03	0.2658	0.259	0.403	0	12	0	0	0	0
1,4-diethylbenzene	543.15	85.67	0.1	134.221	456.94	28.03	0.2658	0.259	0.403	0	12	0	0	0	0
1,4-diethylbenzene	543.15	64.63	0.07567	134.221	456.94	28.03	0.2658	0.259	0.403	0	12	0	0	0	0
1,4-diethylbenzene	543.15	44.32	0.05078	134.221	456.94	28.03	0.2658	0.259	0.403	0	12	0	0	0	0
1,4-diethylbenzene	543.15	26.69	0.02808	134.221	456.94	28.03	0.2658	0.259	0.403	0	12	0	0	0	0
1,4-diethylbenzene	533.15	142.02	0.15494	134.221	456.94	28.03	0.2658	0.259	0.403	0	12	0	0	0	0
1,4-diethylbenzene	533.15	114.03	0.12688	134.221	456.94	28.03	0.2658	0.259	0.403	0	12	0	0	0	0
1,4-diethylbenzene	533.15	88.95	0.1	134.221	456.94	28.03	0.2658	0.259	0.403	0	12	0	0	0	0
1,4-diethylbenzene	533.15	66.86	0.07567	134.221	456.94	28.03	0.2658	0.259	0.403	0	12	0	0	0	0
1,4-diethylbenzene	533.15	45.45	0.05078	134.221	456.94	28.03	0.2658	0.259	0.403	0	12	0	0	0	0
1,4-diethylbenzene	533.15	26.9	0.02808	134.221	456.94	28.03	0.2658	0.259	0.403	0	12	0	0	0	0
1,4-diethylbenzene	523.15	148.39	0.15494	134.221	456.94	28.03	0.2658	0.259	0.403	0	12	0	0	0	0
1,4-diethylbenzene	523.15	118.83	0.12688	134.221	456.94	28.03	0.2658	0.259	0.403	0	12	0	0	0	0
1,4-diethylbenzene	523.15	92.54	0.1	134.221	456.94	28.03	0.2658	0.259	0.403	0	12	0	0	0	0
1,4-diethylbenzene	523.15	69.2	0.07567	134.221	456.94	28.03	0.2658	0.259	0.403	0	12	0	0	0	0
1,4-diethylbenzene	523.15	46.71	0.05078	134.221	456.94	28.03	0.2658	0.259	0.403	0	12	0	0	0	0
1,4-diethylbenzene	523.15	27.21	0.02808	134.221	456.94	28.03	0.2658	0.259	0.403	0	12	0	0	0	0
1,4-diethylbenzene	513.15	123.99	0.12688	134.221	456.94	28.03	0.2658	0.259	0.403	0	12	0	0	0	0
1,4-diethylbenzene	513.15	96.28	0.1	134.221	456.94	28.03	0.2658	0.259	0.403	0	12	0	0	0	0
1,4-diethylbenzene	513.15	71.73	0.07567	134.221	456.94	28.03	0.2658	0.259	0.403	0	12	0	0	0	0
1,4-diethylbenzene	513.15	48.11	0.05078	134.221	456.94	28.03	0.2658	0.259	0.403	0	12	0	0	0	0
1,4-diethylbenzene	513.15	27.65	0.02808	134.221	456.94	28.03	0.2658	0.259	0.403	0	12	0	0	0	0
1,4-diethylbenzene	503.15	129.34	0.12688	134.221	456.94	28.03	0.2658	0.259	0.403	0	12	0	0	0	0
1,4-diethylbenzene	503.15	100.22	0.1	134.221	456.94	28.03	0.2658	0.259	0.403	0	12	0	0	0	0
1,4-diethylbenzene	503.15	74.48	0.07567	134.221	456.94	28.03	0.2658	0.259	0.403	0	12	0	0	0	0
1,4-diethylbenzene	503.15	49.7	0.05078	134.221	456.94	28.03	0.2658	0.259	0.403	0	12	0	0	0	0
1,4-diethylbenzene	503.15	28.21	0.02808	134.221	456.94	28.03	0.2658	0.259	0.403	0	12	0	0	0	0
1,4-diethylbenzene	493.15	135.04	0.12688	134.221	456.94	28.03	0.2658	0.259	0.403	0	12	0	0	0	0
1,4-diethylbenzene	493.15	104.46	0.1	134.221	456.94	28.03	0.2658	0.259	0.403	0	12	0	0	0	0
1,4-diethylbenzene	493.15	77.43	0.07567	134.221	456.94	28.03	0.2658	0.259	0.403	0	12	0	0	0	0
1,4-diethylbenzene	493.15	51.41	0.05078	134.221	456.94	28.03	0.2658	0.259	0.403	0	12	0	0	0	0
1,4-diethylbenzene	493.15	28.91	0.02808	134.221	456.94	28.03	0.2658	0.259	0.403	0	12	0	0	0	0
1,4-diethylbenzene	483.15	141.04	0.12688	134.221	456.94	28.03	0.2658	0.259	0.403	0	12	0	0	0	0
1,4-diethylbenzene	483.15	108.8	0.1	134.221	456.94	28.03	0.2658	0.259	0.403	0	12	0	0	0	0
1,4-diethylbenzene	483.15	80.53	0.07567	134.221	456.94	28.03	0.2658	0.259	0.403	0	12	0	0	0	0
1,4-diethylbenzene	483.15	53.27	0.05078	134.221	456.94	28.03	0.2658	0.259	0.403	0	12	0	0	0	0
1,4-diethylbenzene	483.15	29.74	0.02808	134.221	456.94	28.03	0.2658	0.259	0.403	0	12	0	0	0	0
1,4-diethylbenzene	473.15	147.38	0.12688	134.221	456.94	28.03	0.2658	0.259	0.403	0	12	0	0	0	0
1,4-diethylbenzene	473.15	113.51	0.1	134.221	456.94	28.03	0.2658	0.259	0.403	0	12	0	0	0	0
1,4-diethylbenzene	473.15	84	0.07567	134.221	456.94	28.03	0.2658	0.259	0.403	0	12	0	0	0	0
1,4-diethylbenzene	473.15	55.08	0.05078	134.221	456.94	28.03	0.2658	0.259	0.403	0	12	0	0	0	0
1,4-diethylbenzene	473.15	33.18	0.03046	134.221	456.94	28.03	0.2658	0.259	0.403	0	12	0	0	0	0
1,4-diethylbenzene	473.15	30.62	0.02808	134.221	456.94	28.03	0.2658	0.259	0.403	0	12	0	0	0	0
1,4-diethylbenzene	463.15	118.46	0.1	134.221	456.94	28.03	0.2658	0.259	0.403	0	12	0	0	0	0
1,4-diethylbenzene	463.15	87.33	0.07567	134.221	456.94	28.03	0.2658	0.259	0.403	0	12	0	0	0	0
1,4-diethylbenzene	463.15	57.29	0.05078	134.221	456.94	28.03	0.2658	0.259	0.403	0	12	0	0	0	0
1,4-diethylbenzene	463.15	31.66	0.02808	134.221	456.94	28.03	0.2658	0.259	0.403	0	12	0	0	0	0
1,4-diethylbenzene	453.15	123.77	0.1	134.221	456.94	28.03	0.2658	0.259	0.403	0	12	0	0	0	0
1,4-diethylbenzene	453.15	91.1	0.07567	134.221	456.94	28.03	0.2658	0.259	0.403	0	12	0	0	0	0
1,4-diethylbenzene	453.15	59.67	0.05078	134.221	456.94	28.03	0.2658	0.259	0.403	0	12	0	0	0	0
1,4-diethylbenzene	453.15	35.67	0.03046	134.221	456.94	28.03	0.2658	0.259	0.403	0	12	0	0	0	0
1,4-diethylbenzene	453.15	32.83	0.02808	134.221	456.94	28.03	0.2658	0.259	0.403	0	12	0	0	0	0
1,4-diethylbenzene	443.15	129.46	0.1	134.221	456.94	28.03	0.2658	0.259	0.403	0	12	0	0	0	0
1,4-diethylbenzene	443.15	95.17	0.07567	134.221	456.94	28.03	0.2658	0.259	0.403	0	12	0	0	0	0
1,4-diethylbenzene	443.15	62.18	0.05078	134.221	456.94	28.03	0.2658	0.259	0.403	0	12	0	0	0	0
1,4-diethylbenzene	443.15	34.07	0.02808	134.221	456.94	28.03	0.2658	0.259	0.403	0	12	0	0	0	0
1,4-diethylbenzene	433.15	135.45	0.1	134.221	456.94	28.03	0.2658	0.259	0.403	0	12	0	0	0	0
1,4-diethylbenzene	433.15	99.46	0.07567	134.221	456.94	28.03	0.2658	0.259	0.403	0	12	0	0	0	0
1,4-diethylbenzene	433.15	65.07	0.05078	134.221	456.94	28.03	0.2658	0.259	0.403	0	12	0	0	0	0
1,4-diethylbenzene	433.15	38.6	0.03046	134.221	456.94	28.03	0.2658	0.259	0.403	0	12	0	0	0	0
1,4-diethylbenzene	433.15	35.45	0.02808	134.221	456.94	28.03	0.2658	0.259	0.403	0	12	0	0	0	0
1,4-diethylbenzene	423.15	203.93	0.1	134.221	456.94	28.03	0.2658	0.259	0.403	0	12	0	0	0	0
1,4-diethylbenzene	423.15	104.06	0.07567	134.221	456.94	28.03	0.2658	0.259	0.403	0	12	0	0	0	0
1,4-diethylbenzene	423.15	67.86	0.05078	134.221	456.94	28.03	0.2658	0.259	0.403	0	12	0	0	0	0
1,4-diethylbenzene	423.15	37	0.02808	134.221	456.94	28.03	0.2658	0.259	0.403	0	12	0	0	0	0
1,4-diethylbenzene	413.15	148.75	0.1	134.221	456.94	28.03	0.2658	0.259	0.403	0	12	0	0	0	0
1,4-diethylbenzene	413.15	109.02	0.07567	134.221	456.94	28.03	0.2658	0.259	0.403	0	12	0	0	0	0
1,4-diethylbenzene	413.15	70.97	0.05078	134.221	456.94	28.03	0.2658	0.259	0.403	0	12	0	0	0	0
1,4-diethylbenzene	413.15	42.04	0.03046	134.221	456.94	28.03	0.2658	0.259	0.403	0	12	0	0	0	0
1,4-diethylbenzene	413.15	38.59	0.02808	134.221	456.94	28.03	0.2658	0.259	0.403	0	12	0	0	0	0
1,4-diethylbenzene	403.15	114.09	0.07567	134.221	456.94	28.03	0.2658	0.259	0.403	0	12	0	0	0	0
1,4-diethylbenzene	403.15	74.12	0.05078	134.221	456.94	28.03	0.2658	0.259	0.403	0	12	0	0	0	0
1,4-diethylbenzene	403.15	40.31	0.02808	134.221	456.94	28.03	0.2658	0.259	0.403	0	12	0	0	0	0
1,4-diethylbenzene	393.15	120.08	0.07567	134.221	456.94	28.03	0.2658	0.259	0.403	0	12	0	0	0	0
1,4-diethylbenzene	393.15	77.9	0.05078	134.221	456.94	28.03	0.2658	0.259	0.403	0	12	0	0	0	0
1,4-diethylbenzene	393.15	42.24	0.02808	134.221	456.94	28.03	0.2658	0.259	0.403	0	12	0	0	0	0
1,4-diethylbenzene	383.15	126.23	0.07567	134.221	456.94	28.03	0.2658	0.259	0.403	0	12	0	0	0	0
1,4-diethylbenzene	383.15	81.83	0.05078	134.221	456.94	28.03	0.2658	0.259	0.403	0	12	0	0	0	0
1,4-diethylbenzene	383.15	44.35	0.02808	134.221	456.94	28.03	0.2658	0.259	0.403	0	12	0	0	0	0
1,4-diethylbenzene	373.15	132.92	0.07567	134.221	456.94	28.03	0.2658	0.259	0.403	0	12	0	0	0	0
1,4-diethylbenzene	373.15	86.02	0.05078	134.221	456.94	28.03	0.2658	0.259	0.403	0	12	0	0	0	0
1,4-diethylbenzene	373.15	46.61	0.02808	134.221	456.94	28.03	0.2658	0.259	0.403	0	12	0	0	0	0
1,4-diethylbenzene	363.15	140	0.07567	134.221	456.94	28.03	0.2658	0.259	0.403	0	12	0	0	0	0
1,4-diethylbenzene	363.15	90.62	0.05078	134.221	456.94	28.03	0.2658	0.259	0.403	0	12	0	0	0	0
1,4-diethylbenzene	363.15	48.98	0.02808	134.221	456.94	28.03	0.2658	0.259	0.403	0	12	0	0	0	0
1,4-diethylbenzene	353.15	147.75	0.07567	134.221	456.94	28.03	0.2658	0.259	0.403	0	12	0	0	0	0
1,4-diethylbenzene	353.15	95.59	0.05078	134.221	456.94	28.03	0.2658	0.259	0.403	0	12	0	0	0	0
1,4-diethylbenzene	353.15	51.66	0.02808	134.221	456.94	28.03	0.2658	0.259	0.403	0	12	0	0	0	0
1,4-diethylbenzene	343.15	100.98	0.05078	134.221	456.94	28.03	0.2658	0.259	0.403	0	12	0	0	0	0
1,4-diethylbenzene	343.15	54.5	0.02808	134.221	456.94	28.03	0.2658	0.259	0.403	0	12	0	0	0	0
1,4-diethylbenzene	333.15	106.92	0.05078	134.221	456.94	28.03	0.2658	0.259	0.403	0	12	0	0	0	0
1,4-diethylbenzene	333.15	57.6	0.02808	134.221	456.94	28.03	0.2658	0.259	0.403	0	12	0	0	0	0
1,4-diethylbenzene	323.15	113.65	0.05078	134.221	456.94	28.03	0.2658	0.259	0.403	0	12	0	0	0	0
1,4-diethylbenzene	323.15	68.08	0.02808	134.221	456.94	28.03	0.2658	0.259	0.403	0	12	0	0	0	0
1,4-diethylbenzene	313.15	120.97	0.05078	134.221	456.94	28.03	0.2658	0.259	0.403	0	12	0	0	0	0
1,4-diethylbenzene	313.15	65.03	0.02808	134.221	456.94	28.03	0.2658	0.259	0.403	0	12	0	0	0	0
1,4-diethylbenzene	308.15	124.92	0.05078	134.221	456.94	28.03	0.2658	0.259	0.403	0	12	0	0	0	0
1,4-diethylbenzene	308.15	67.13	0.02808	134.221	456.94	28.03	0.2658	0.259	0.403	0	12	0	0	0	0
1,4-dioxane	373.15	91.2	0.02914	88.106	374.3	52.08	0.3702	0.254	0.28	2	25.66	0.719408	0	0	0
1,4-dioxane	373.15	63.8	0.02049	88.106	374.3	52.08	0.3702	0.254	0.28	2	25.66	0.719408	0	0	0
1,4-dioxane	373.15	27.8	0.00896	88.106	374.3	52.08	0.3702	0.254	0.28	2	25.66	0.719408	0	0	0
1,4-dioxane	323.15	99.4	0.02248	88.106	374.3	52.08	0.3702	0.254	0.28	2	25.66	0.719408	0	0	0
1,4-dioxane	323.15	57.1	0.01297	88.106	374.3	52.08	0.3702	0.254	0.28	2	25.66	0.719408	0	0	0
1,4-dioxane	323.15	28.6	0.00648	88.106	374.3	52.08	0.3702	0.254	0.28	2	25.66	0.719408	0	0	0
1,4-dioxane	298.15	94.6	0.01707	88.106	374.3	52.08	0.3702	0.254	0.28	2	25.66	0.719408	0	0	0
1,4-dioxane	298.15	65.85	0.01205	88.106	374.3	52.08	0.3702	0.254	0.28	2	25.66	0.719408	0	0	0
1,4-dioxane	298.15	18.95	0.00345	88.106	374.3	52.08	0.3702	0.254	0.28	2	25.66	0.719408	0	0	0
1-butanol	524.9	88.2	0.1064	74.123	390.6	44.23	0.2695	0.26	0.594	1	26.23	0.771254	0	0	2
1-butanol	512.6	81.7	0.0938	74.123	390.6	44.23	0.2695	0.26	0.594	1	26.23	0.771254	0	0	2
1-butanol	497.9	76.3	0.082	74.123	390.6	44.23	0.2695	0.26	0.594	1	26.23	0.771254	0	0	2
1-butanol	472.6	66.5	0.068	74.123	390.6	44.23	0.2695	0.26	0.594	1	26.23	0.771254	0	0	2
1-butanol	452.2	61.5	0.0584	74.123	390.6	44.23	0.2695	0.26	0.594	1	26.23	0.771254	0	0	2
1-butanol	421.6	54.3	0.0481	74.123	390.6	44.23	0.2695	0.26	0.594	1	26.23	0.771254	0	0	2
1-butanol	373.2	45.6	0.0367	74.123	390.6	44.23	0.2695	0.26	0.594	1	26.23	0.771254	0	0	2
1-butanol	373.15	78	0.02874	74.123	390.6	44.23	0.2695	0.26	0.594	1	26.23	0.771254	0	0	2
1-butanol	373.15	33.8	0.01294	74.123	390.6	44.23	0.2695	0.26	0.594	1	26.23	0.771254	0	0	2
1-butanol	373.15	30.4	0.01202	74.123	390.6	44.23	0.2695	0.26	0.594	1	26.23	0.771254	0	0	2
1-butanol	373.15	28.9	0.0111	74.123	390.6	44.23	0.2695	0.26	0.594	1	26.23	0.771254	0	0	2
1-butanol	373.15	22.3	0.008504	74.123	390.6	44.23	0.2695	0.26	0.594	1	26.23	0.771254	0	0	2
1-butanol	373.15	21.7	0.008243	74.123	390.6	44.23	0.2695	0.26	0.594	1	26.23	0.771254	0	0	2
1-butanol	373.15	18.8	0.007139	74.123	390.6	44.23	0.2695	0.26	0.594	1	26.23	0.771254	0	0	2
1-butanol	373.15	12.83	0.005024	74.123	390.6	44.23	0.2695	0.26	0.594	1	26.23	0.771254	0	0	2
1-butanol	373.15	9.82	0.003793	74.123	390.6	44.23	0.2695	0.26	0.594	1	26.23	0.771254	0	0	2
1-butanol	368.8	44.9	0.036	74.123	390.6	44.23	0.2695	0.26	0.594	1	26.23	0.771254	0	0	2
1-butanol	349.4	42	0.0327	74.123	390.6	44.23	0.2695	0.26	0.594	1	26.23	0.771254	0	0	2
1-butanol	323.15	99.3	0.0288	74.123	390.6	44.23	0.2695	0.26	0.594	1	26.23	0.771254	0	0	2
1-butanol	323.15	68.2	0.02006	74.123	390.6	44.23	0.2695	0.26	0.594	1	26.23	0.771254	0	0	2
1-butanol	323.15	43.5	0.01305	74.123	390.6	44.23	0.2695	0.26	0.594	1	26.23	0.771254	0	0	2
1-butanol	323.15	30.4	0.009293	74.123	390.6	44.23	0.2695	0.26	0.594	1	26.23	0.771254	0	0	2
1-butanol	323.15	25.4	0.007802	74.123	390.6	44.23	0.2695	0.26	0.594	1	26.23	0.771254	0	0	2
1-butanol	323.15	21.7	0.006734	74.123	390.6	44.23	0.2695	0.26	0.594	1	26.23	0.771254	0	0	2
1-butanol	323.15	15.61	0.004844	74.123	390.6	44.23	0.2695	0.26	0.594	1	26.23	0.771254	0	0	2
1-butanol	323.15	11.71	0.003669	74.123	390.6	44.23	0.2695	0.26	0.594	1	26.23	0.771254	0	0	2
1-butanol	323.15	8.33	0.002599	74.123	390.6	44.23	0.2695	0.26	0.594	1	26.23	0.771254	0	0	2
1-butanol	323.15	4.92	0.001561	74.123	390.6	44.23	0.2695	0.26	0.594	1	26.23	0.771254	0	0	2
1-butanol	322.6	40.6	0.0236	74.123	390.6	44.23	0.2695	0.26	0.594	1	26.23	0.771254	0	0	2
1-butanol	298.15	97.3	0.02488	74.123	390.6	44.23	0.2695	0.26	0.594	1	26.23	0.771254	0	0	2
1-butanol	298.15	80.7	0.02096	74.123	390.6	44.23	0.2695	0.26	0.594	1	26.23	0.771254	0	0	2
1-butanol	298.15	77.1	0.0199	74.123	390.6	44.23	0.2695	0.26	0.594	1	26.23	0.771254	0	0	2
1-butanol	298.15	28.5	0.0076	74.123	390.6	44.23	0.2695	0.26	0.594	1	26.23	0.771254	0	0	2
1-butanol	298.15	13.42	0.003697	74.123	390.6	44.23	0.2695	0.26	0.594	1	26.23	0.771254	0	0	2
1-butanol	298.15	13.41	0.003687	74.123	390.6	44.23	0.2695	0.26	0.594	1	26.23	0.771254	0	0	2
1-butanol	298.15	9.08	0.002492	74.123	390.6	44.23	0.2695	0.26	0.594	1	26.23	0.771254	0	0	2
1-butanol	298.15	5.79	0.001595	74.123	390.6	44.23	0.2695	0.26	0.594	1	26.23	0.771254	0	0	2
1-butanol	295.3	39.1	0.0137	74.123	390.6	44.23	0.2695	0.26	0.594	1	26.23	0.771254	0	0	2
1-butanol	291	31	0.0087	74.123	390.6	44.23	0.2695	0.26	0.594	1	26.23	0.771254	0	0	2
1-butanol	291	26	0.0071	74.123	390.6	44.23	0.2695	0.26	0.594	1	26.23	0.771254	0	0	2
1-butanol	291	21.5	0.006	74.123	390.6	44.23	0.2695	0.26	0.594	1	26.23	0.771254	0	0	2
1-butanol	291	15.2	0.0044	74.123	390.6	44.23	0.2695	0.26	0.594	1	26.23	0.771254	0	0	2
1-butyl acetate	291	31	0.014	116.16	399	30.9	0.2871	0.261	0.439	2	35.9	0.732591	0	1	2
1-butyl acetate	291	26.5	0.0109	116.16	399	30.9	0.2871	0.261	0.439	2	35.9	0.732591	0	1	2
1-butyl acetate	291	20.7	0.0084	116.16	399	30.9	0.2871	0.261	0.439	2	35.9	0.732591	0	1	2
1-butyl acetate	291	14.2	0.006	116.16	399	30.9	0.2871	0.261	0.439	2	35.9	0.732591	0	1	2
1-hexadecanol	514.9	48.61	0.0674	242.445	613.15	12.64	0.2233	0.213	1.089	1	40.63	0.497908	0	0	14
1-hexadecanol	509.5	48.08	0.0664	242.445	613.15	12.64	0.2233	0.213	1.089	1	40.63	0.497908	0	0	14
1-hexadecanol	504.4	47.6	0.0652	242.445	613.15	12.64	0.2233	0.213	1.089	1	40.63	0.497908	0	0	14
1-hexadecanol	500.2	47.2	0.0644	242.445	613.15	12.64	0.2233	0.213	1.089	1	40.63	0.497908	0	0	14
1-hexadecanol	494	46.61	0.0631	242.445	613.15	12.64	0.2233	0.213	1.089	1	40.63	0.497908	0	0	14
1-hexadecanol	490	46.24	0.0623	242.445	613.15	12.64	0.2233	0.213	1.089	1	40.63	0.497908	0	0	14
1-hexadecanol	485.1	45.8	0.0612	242.445	613.15	12.64	0.2233	0.213	1.089	1	40.63	0.497908	0	0	14
1-hexadecanol	480.3	45.35	0.0602	242.445	613.15	12.64	0.2233	0.213	1.089	1	40.63	0.497908	0	0	14
1-hexadecanol	474.5	44.81	0.0591	242.445	613.15	12.64	0.2233	0.213	1.089	1	40.63	0.497908	0	0	14
1-hexadecanol	469.9	44.37	0.0583	242.445	613.15	12.64	0.2233	0.213	1.089	1	40.63	0.497908	0	0	14
1-hexadecanol	465	43.88	0.0576	242.445	613.15	12.64	0.2233	0.213	1.089	1	40.63	0.497908	0	0	14
1-hexadecanol	459.8	43.36	0.0569	242.445	613.15	12.64	0.2233	0.213	1.089	1	40.63	0.497908	0	0	14
1-hexadecanol	454.9	42.87	0.0563	242.445	613.15	12.64	0.2233	0.213	1.089	1	40.63	0.497908	0	0	14
1-hexadecanol	450	42.38	0.0556	242.445	613.15	12.64	0.2233	0.213	1.089	1	40.63	0.497908	0	0	14
1-hexadecanol	445.1	41.89	0.0551	242.445	613.15	12.64	0.2233	0.213	1.089	1	40.63	0.497908	0	0	14
1-hexadecanol	440.5	41.44	0.0544	242.445	613.15	12.64	0.2233	0.213	1.089	1	40.63	0.497908	0	0	14
1-hexadecanol	435.3	40.95	0.0536	242.445	613.15	12.64	0.2233	0.213	1.089	1	40.63	0.497908	0	0	14
1-hexadecanol	429.9	40.44	0.0529	242.445	613.15	12.64	0.2233	0.213	1.089	1	40.63	0.497908	0	0	14
1-hexadecanol	425.2	39.99	0.0522	242.445	613.15	12.64	0.2233	0.213	1.089	1	40.63	0.497908	0	0	14
1-hexadecanol	420.3	39.52	0.0515	242.445	613.15	12.64	0.2233	0.213	1.089	1	40.63	0.497908	0	0	14
1-hexadecanol	415.3	39.02	0.051	242.445	613.15	12.64	0.2233	0.213	1.089	1	40.63	0.497908	0	0	14
1-hexadecanol	410	38.51	0.0505	242.445	613.15	12.64	0.2233	0.213	1.089	1	40.63	0.497908	0	0	14
1-hexadecanol	404.5	37.94	0.0501	242.445	613.15	12.64	0.2233	0.213	1.089	1	40.63	0.497908	0	0	14
1-hexadecanol	399.9	37.48	0.0497	242.445	613.15	12.64	0.2233	0.213	1.089	1	40.63	0.497908	0	0	14
1-hexadecanol	395.6	37.05	0.0493	242.445	613.15	12.64	0.2233	0.213	1.089	1	40.63	0.497908	0	0	14
1-hexadecanol	391.2	36.61	0.049	242.445	613.15	12.64	0.2233	0.213	1.089	1	40.63	0.497908	0	0	14
1-hexadecanol	385.8	36.12	0.0482	242.445	613.15	12.64	0.2233	0.213	1.089	1	40.63	0.497908	0	0	14
1-hexadecanol	380.9	35.67	0.0475	242.445	613.15	12.64	0.2233	0.213	1.089	1	40.63	0.497908	0	0	14
1-hexadecanol	376.3	35.24	0.0469	242.445	613.15	12.64	0.2233	0.213	1.089	1	40.63	0.497908	0	0	14
1-hexadecanol	372.1	34.82	0.0466	242.445	613.15	12.64	0.2233	0.213	1.089	1	40.63	0.497908	0	0	14
1-hexanol	373.15	102.4	0.04782	102.177	430	34.17	0.264	0.261	0.576	1	28.63	0.706601	0	0	4
1-hexanol	373.15	87.1	0.04062	102.177	430	34.17	0.264	0.261	0.576	1	28.63	0.706601	0	0	4
1-hexanol	373.15	73.7	0.03404	102.177	430	34.17	0.264	0.261	0.576	1	28.63	0.706601	0	0	4
1-hexanol	373.15	32.6	0.01552	102.177	430	34.17	0.264	0.261	0.576	1	28.63	0.706601	0	0	4
1-hexanol	323.15	103.4	0.03741	102.177	430	34.17	0.264	0.261	0.576	1	28.63	0.706601	0	0	4
1-hexanol	323.15	83.1	0.02964	102.177	430	34.17	0.264	0.261	0.576	1	28.63	0.706601	0	0	4
1-hexanol	323.15	66.6	0.02504	102.177	430	34.17	0.264	0.261	0.576	1	28.63	0.706601	0	0	4
1-hexanol	323.15	44.3	0.01646	102.177	430	34.17	0.264	0.261	0.576	1	28.63	0.706601	0	0	4
1-hexanol	323.15	34	0.01135	102.177	430	34.17	0.264	0.261	0.576	1	28.63	0.706601	0	0	4
1-hexanol	298.15	98.7	0.03058	102.177	430	34.17	0.264	0.261	0.576	1	28.63	0.706601	0	0	4
1-hexanol	298.15	79.9	0.02519	102.177	430	34.17	0.264	0.261	0.576	1	28.63	0.706601	0	0	4
1-hexanol	298.15	57.1	0.0185	102.177	430	34.17	0.264	0.261	0.576	1	28.63	0.706601	0	0	4
1-hexanol	298.15	51	0.01822	102.177	430	34.17	0.264	0.261	0.576	1	28.63	0.706601	0	0	4
1-hexanol	298.15	30.1	0.00995	102.177	430	34.17	0.264	0.261	0.576	1	28.63	0.706601	0	0	4
1-methyinaphthalene	573.15	125.75	0.08816	142.2	502.93	33.6	0.2978	0.25	0.425	0	13.2	0	0	0	16
1-methyinaphthalene	573.15	91.51	0.06525	142.2	502.93	33.6	0.2978	0.25	0.425	0	13.2	0	0	0	16
1-methyinaphthalene	573.15	75.92	0.05445	142.2	502.93	33.6	0.2978	0.25	0.425	0	13.2	0	0	0	16
1-methyinaphthalene	573.15	55.07	0.0394	142.2	502.93	33.6	0.2978	0.25	0.425	0	13.2	0	0	0	16
1-methyinaphthalene	573.15	31.87	0.02222	142.2	502.93	33.6	0.2978	0.25	0.425	0	13.2	0	0	0	16
1-methyinaphthalene	563.15	130.6	0.08816	142.2	502.93	33.6	0.2978	0.25	0.425	0	13.2	0	0	0	16
1-methyinaphthalene	563.15	94.82	0.06525	142.2	502.93	33.6	0.2978	0.25	0.425	0	13.2	0	0	0	16
1-methyinaphthalene	563.15	56.83	0.0394	142.2	502.93	33.6	0.2978	0.25	0.425	0	13.2	0	0	0	16
1-methyinaphthalene	563.15	32.64	0.02222	142.2	502.93	33.6	0.2978	0.25	0.425	0	13.2	0	0	0	16
1-methyinaphthalene	553.15	135.58	0.08816	142.2	502.93	33.6	0.2978	0.25	0.425	0	13.2	0	0	0	16
1-methyinaphthalene	553.15	98.29	0.06525	142.2	502.93	33.6	0.2978	0.25	0.425	0	13.2	0	0	0	16
1-methyinaphthalene	553.15	58.67	0.0394	142.2	502.93	33.6	0.2978	0.25	0.425	0	13.2	0	0	0	16
1-methyinaphthalene	553.15	33.45	0.02222	142.2	502.93	33.6	0.2978	0.25	0.425	0	13.2	0	0	0	16
1-methyinaphthalene	543.15	140.91	0.08816	142.2	502.93	33.6	0.2978	0.25	0.425	0	13.2	0	0	0	16
1-methyinaphthalene	543.15	102.67	0.06525	142.2	502.93	33.6	0.2978	0.25	0.425	0	13.2	0	0	0	16
1-methyinaphthalene	543.15	60.71	0.0394	142.2	502.93	33.6	0.2978	0.25	0.425	0	13.2	0	0	0	16
1-methyinaphthalene	543.15	34.38	0.02222	142.2	502.93	33.6	0.2978	0.25	0.425	0	13.2	0	0	0	16
1-methyinaphthalene	533.15	146.45	0.08816	142.2	502.93	33.6	0.2978	0.25	0.425	0	13.2	0	0	0	16
1-methyinaphthalene	533.15	106	0.06525	142.2	502.93	33.6	0.2978	0.25	0.425	0	13.2	0	0	0	16
1-methyinaphthalene	533.15	62.87	0.0394	142.2	502.93	33.6	0.2978	0.25	0.425	0	13.2	0	0	0	16
1-methyinaphthalene	533.15	35.37	0.02222	142.2	502.93	33.6	0.2978	0.25	0.425	0	13.2	0	0	0	16
1-methyinaphthalene	523.15	152.37	0.08816	142.2	502.93	33.6	0.2978	0.25	0.425	0	13.2	0	0	0	16
1-methyinaphthalene	523.15	110.07	0.06525	142.2	502.93	33.6	0.2978	0.25	0.425	0	13.2	0	0	0	16
1-methyinaphthalene	523.15	65.14	0.0394	142.2	502.93	33.6	0.2978	0.25	0.425	0	13.2	0	0	0	16
1-methyinaphthalene	523.15	36.54	0.02222	142.2	502.93	33.6	0.2978	0.25	0.425	0	13.2	0	0	0	16
1-methyinaphthalene	513.15	158.56	0.08816	142.2	502.93	33.6	0.2978	0.25	0.425	0	13.2	0	0	0	16
1-methyinaphthalene	513.15	114.53	0.06525	142.2	502.93	33.6	0.2978	0.25	0.425	0	13.2	0	0	0	16
1-methyinaphthalene	513.15	94.6	0.05445	142.2	502.93	33.6	0.2978	0.25	0.425	0	13.2	0	0	0	16
1-methyinaphthalene	513.15	67.64	0.0394	142.2	502.93	33.6	0.2978	0.25	0.425	0	13.2	0	0	0	16
1-methyinaphthalene	513.15	37.8	0.02222	142.2	502.93	33.6	0.2978	0.25	0.425	0	13.2	0	0	0	16
1-methyinaphthalene	503.15	119.24	0.06525	142.2	502.93	33.6	0.2978	0.25	0.425	0	13.2	0	0	0	16
1-methyinaphthalene	503.15	70.26	0.0394	142.2	502.93	33.6	0.2978	0.25	0.425	0	13.2	0	0	0	16
1-methyinaphthalene	503.15	39.13	0.02222	142.2	502.93	33.6	0.2978	0.25	0.425	0	13.2	0	0	0	16
1-methyinaphthalene	493.15	124.18	0.06525	142.2	502.93	33.6	0.2978	0.25	0.425	0	13.2	0	0	0	16
1-methyinaphthalene	493.15	73.08	0.0394	142.2	502.93	33.6	0.2978	0.25	0.425	0	13.2	0	0	0	16
1-methyinaphthalene	493.15	40.59	0.02222	142.2	502.93	33.6	0.2978	0.25	0.425	0	13.2	0	0	0	16
1-methyinaphthalene	483.15	129.38	0.06525	142.2	502.93	33.6	0.2978	0.25	0.425	0	13.2	0	0	0	16
1-methyinaphthalene	483.15	76.06	0.0394	142.2	502.93	33.6	0.2978	0.25	0.425	0	13.2	0	0	0	16
1-methyinaphthalene	483.15	42.22	0.02222	142.2	502.93	33.6	0.2978	0.25	0.425	0	13.2	0	0	0	16
1-methyinaphthalene	473.15	134.98	0.06525	142.2	502.93	33.6	0.2978	0.25	0.425	0	13.2	0	0	0	16
1-methyinaphthalene	473.15	79.19	0.0394	142.2	502.93	33.6	0.2978	0.25	0.425	0	13.2	0	0	0	16
1-methyinaphthalene	473.15	44.2	0.02222	142.2	502.93	33.6	0.2978	0.25	0.425	0	13.2	0	0	0	16
1-methyinaphthalene	463.15	140.38	0.06525	142.2	502.93	33.6	0.2978	0.25	0.425	0	13.2	0	0	0	16
1-methyinaphthalene	463.15	82.32	0.0394	142.2	502.93	33.6	0.2978	0.25	0.425	0	13.2	0	0	0	16
1-methyinaphthalene	463.15	45.49	0.02222	142.2	502.93	33.6	0.2978	0.25	0.425	0	13.2	0	0	0	16
1-methyinaphthalene	453.15	147	0.06525	142.2	502.93	33.6	0.2978	0.25	0.425	0	13.2	0	0	0	16
1-methyinaphthalene	453.15	86.13	0.0394	142.2	502.93	33.6	0.2978	0.25	0.425	0	13.2	0	0	0	16
1-methyinaphthalene	453.15	47.44	0.02222	142.2	502.93	33.6	0.2978	0.25	0.425	0	13.2	0	0	0	16
1-methyinaphthalene	443.15	153.85	0.06525	142.2	502.93	33.6	0.2978	0.25	0.425	0	13.2	0	0	0	16
1-methyinaphthalene	443.15	89.89	0.0394	142.2	502.93	33.6	0.2978	0.25	0.425	0	13.2	0	0	0	16
1-methyinaphthalene	443.15	49.5	0.02222	142.2	502.93	33.6	0.2978	0.25	0.425	0	13.2	0	0	0	16
1-methyinaphthalene	433.15	161.47	0.06525	142.2	502.93	33.6	0.2978	0.25	0.425	0	13.2	0	0	0	16
1-methyinaphthalene	433.15	94.02	0.0394	142.2	502.93	33.6	0.2978	0.25	0.425	0	13.2	0	0	0	16
1-methyinaphthalene	433.15	51.78	0.02222	142.2	502.93	33.6	0.2978	0.25	0.425	0	13.2	0	0	0	16
1-methyinaphthalene	423.15	98.57	0.0394	142.2	502.93	33.6	0.2978	0.25	0.425	0	13.2	0	0	0	16
1-methyinaphthalene	423.15	52.32	0.02222	142.2	502.93	33.6	0.2978	0.25	0.425	0	13.2	0	0	0	16
1-methyinaphthalene	413.15	103.36	0.0394	142.2	502.93	33.6	0.2978	0.25	0.425	0	13.2	0	0	0	16
1-methyinaphthalene	413.15	56.79	0.02222	142.2	502.93	33.6	0.2978	0.25	0.425	0	13.2	0	0	0	16
1-methyinaphthalene	403.15	108.31	0.0394	142.2	502.93	33.6	0.2978	0.25	0.425	0	13.2	0	0	0	16
1-methyinaphthalene	403.15	59.71	0.02222	142.2	502.93	33.6	0.2978	0.25	0.425	0	13.2	0	0	0	16
1-methyinaphthalene	393.15	114.46	0.0394	142.2	502.93	33.6	0.2978	0.25	0.425	0	13.2	0	0	0	16
1-methyinaphthalene	393.15	62.64	0.02222	142.2	502.93	33.6	0.2978	0.25	0.425	0	13.2	0	0	0	16
1-methyl-pyrrolidone-2	373.15	97.4	0.02297	99.133	475.2	45.2	0.3198	0.234	0.373	1	37.5	0.776	0	1	4
1-methyl-pyrrolidone-2	373.15	69.6	0.01661	99.133	475.2	45.2	0.3198	0.234	0.373	1	37.5	0.776	0	1	4
1-methyl-pyrrolidone-2	373.15	27.9	0.00663	99.133	475.2	45.2	0.3198	0.234	0.373	1	37.5	0.776	0	1	4
1-methyl-pyrrolidone-2	373.15	14.1	0.00335	99.133	475.2	45.2	0.3198	0.234	0.373	1	37.5	0.776	0	1	4
1-methyl-pyrrolidone-2	323.15	87.2	0.01459	99.133	475.2	45.2	0.3198	0.234	0.373	1	37.5	0.776	0	1	4
1-methyl-pyrrolidone-2	323.15	43.4	0.00739	99.133	475.2	45.2	0.3198	0.234	0.373	1	37.5	0.776	0	1	4
1-methyl-pyrrolidone-2	323.15	21.7	0.00372	99.133	475.2	45.2	0.3198	0.234	0.373	1	37.5	0.776	0	1	4
1-methyl-pyrrolidone-2	298.15	83.4	0.01164	99.133	475.2	45.2	0.3198	0.234	0.373	1	37.5	0.776	0	1	4
1-methyl-pyrrolidone-2	298.15	54.7	0.00778	99.133	475.2	45.2	0.3198	0.234	0.373	1	37.5	0.776	0	1	4
1-methyl-pyrrolidone-2	298.15	27.8	0.00387	99.133	475.2	45.2	0.3198	0.234	0.373	1	37.5	0.776	0	1	4
1-octanol	317.9	84.61	0.0341	130.23	468	27.77	0.262	0.254	0.583	1	31.03	0.65195	0	0	6
1-octanol	317.9	70.22	0.0295	130.23	468	27.77	0.262	0.254	0.583	1	31.03	0.65195	0	0	6
1-octanol	317.9	58.34	0.0256	130.23	468	27.77	0.262	0.254	0.583	1	31.03	0.65195	0	0	6
1-octanol	317.9	47.27	0.0197	130.23	468	27.77	0.262	0.254	0.583	1	31.03	0.65195	0	0	6
1-octanol	317.9	36.49	0.0156	130.23	468	27.77	0.262	0.254	0.583	1	31.03	0.65195	0	0	6
1-octanol	317.9	25.73	0.0105	130.23	468	27.77	0.262	0.254	0.583	1	31.03	0.65195	0	0	6
1-octanol	303.12	82.48	0.0304	130.23	468	27.77	0.262	0.254	0.583	1	31.03	0.65195	0	0	6
1-octanol	303.12	70.83	0.027	130.23	468	27.77	0.262	0.254	0.583	1	31.03	0.65195	0	0	6
1-octanol	303.12	58.75	0.0231	130.23	468	27.77	0.262	0.254	0.583	1	31.03	0.65195	0	0	6
1-octanol	303.12	47.31	0.0184	130.23	468	27.77	0.262	0.254	0.583	1	31.03	0.65195	0	0	6
1-octanol	303.12	36.49	0.0148	130.23	468	27.77	0.262	0.254	0.583	1	31.03	0.65195	0	0	6
1-octanol	303.12	25.69	0.0106	130.23	468	27.77	0.262	0.254	0.583	1	31.03	0.65195	0	0	6
1-octanol	295.15	13.79	0.00541	130.23	468	27.77	0.262	0.254	0.583	1	31.03	0.65195	0	0	6
1-octanol	295.15	12.07	0.00426	130.23	468	27.77	0.262	0.254	0.583	1	31.03	0.65195	0	0	6
1-octanol	295.15	10.34	0.0041	130.23	468	27.77	0.262	0.254	0.583	1	31.03	0.65195	0	0	6
1-octanol	295.15	8.62	0.00336	130.23	468	27.77	0.262	0.254	0.583	1	31.03	0.65195	0	0	6
1-octanol	295.15	6.9	0.00246	130.23	468	27.77	0.262	0.254	0.583	1	31.03	0.65195	0	0	6
1-octanol	288.41	80.55	0.0271	130.23	468	27.77	0.262	0.254	0.583	1	31.03	0.65195	0	0	6
1-octanol	288.41	69.41	0.0238	130.23	468	27.77	0.262	0.254	0.583	1	31.03	0.65195	0	0	6
1-octanol	288.41	58.04	0.0205	130.23	468	27.77	0.262	0.254	0.583	1	31.03	0.65195	0	0	6
1-octanol	288.41	47.19	0.0174	130.23	468	27.77	0.262	0.254	0.583	1	31.03	0.65195	0	0	6
1-octanol	288.41	36.41	0.0127	130.23	468	27.77	0.262	0.254	0.583	1	31.03	0.65195	0	0	6
1-octanol	288.41	25.7	0.0096	130.23	468	27.77	0.262	0.254	0.583	1	31.03	0.65195	0	0	6
1-octanol	273.32	81.47	0.0245	130.23	468	27.77	0.262	0.254	0.583	1	31.03	0.65195	0	0	6
1-octanol	273.32	69.81	0.0218	130.23	468	27.77	0.262	0.254	0.583	1	31.03	0.65195	0	0	6
1-octanol	273.32	58.43	0.0191	130.23	468	27.77	0.262	0.254	0.583	1	31.03	0.65195	0	0	6
1-octanol	273.32	47.5	0.0148	130.23	468	27.77	0.262	0.254	0.583	1	31.03	0.65195	0	0	6
1-octanol	273.32	36.57	0.0122	130.23	468	27.77	0.262	0.254	0.583	1	31.03	0.65195	0	0	6
1-octanol	273.32	25.89	0.0086	130.23	468	27.77	0.262	0.254	0.583	1	31.03	0.65195	0	0	6
1-octene	333.15	70	0.059	112.215	395	26.8	0.2398	0.266	0.392	0	10.8	0	0	0	6
1-octene	333.15	58.6	0.05	112.215	395	26.8	0.2398	0.266	0.392	0	10.8	0	0	0	6
1-octene	333.15	44.8	0.038	112.215	395	26.8	0.2398	0.266	0.392	0	10.8	0	0	0	6
1-octene	333.15	28.1	0.024	112.215	395	26.8	0.2398	0.266	0.392	0	10.8	0	0	0	6
1-octene	333.15	9.4	0.008	112.215	395	26.8	0.2398	0.266	0.392	0	10.8	0	0	0	6
1-octene	313.15	73.6	0.06	112.215	395	26.8	0.2398	0.266	0.392	0	10.8	0	0	0	6
1-octene	313.15	53.5	0.043	112.215	395	26.8	0.2398	0.266	0.392	0	10.8	0	0	0	6
1-octene	313.15	36.3	0.031	112.215	395	26.8	0.2398	0.266	0.392	0	10.8	0	0	0	6
1-octene	313.15	22.7	0.019	112.215	395	26.8	0.2398	0.266	0.392	0	10.8	0	0	0	6
1-octene	313.15	9.3	0.008	112.215	395	26.8	0.2398	0.266	0.392	0	10.8	0	0	0	6
1-octene	295	207.8	0.1209	112.215	395	26.8	0.2398	0.266	0.392	0	10.8	0	0	0	6
1-octene	295	173.3	0.1048	112.215	395	26.8	0.2398	0.266	0.392	0	10.8	0	0	0	6
1-octene	295	138.8	0.0865	112.215	395	26.8	0.2398	0.266	0.392	0	10.8	0	0	0	6
1-octene	295	104.4	0.0642	112.215	395	26.8	0.2398	0.266	0.392	0	10.8	0	0	0	6
1-octene	295	69.9	0.0435	112.215	395	26.8	0.2398	0.266	0.392	0	10.8	0	0	0	6
1-pentanol	373.15	79.7	0.0333	88.15	411	38.97	0.2704	0.26	0.573	1	27.43	0.737514	0	0	3
1-pentanol	373.15	60.5	0.0256	88.15	411	38.97	0.2704	0.26	0.573	1	27.43	0.737514	0	0	3
1-pentanol	373.15	33.4	0.0143	88.15	411	38.97	0.2704	0.26	0.573	1	27.43	0.737514	0	0	3
1-pentanol	323.15	88.4	0.0288	88.15	411	38.97	0.2704	0.26	0.573	1	27.43	0.737514	0	0	3
1-pentanol	323.15	55.3	0.0181	88.15	411	38.97	0.2704	0.26	0.573	1	27.43	0.737514	0	0	3
1-pentanol	323.15	25.4	0.0087	88.15	411	38.97	0.2704	0.26	0.573	1	27.43	0.737514	0	0	3
1-pentanol	298.15	98	0.0279	88.15	411	38.97	0.2704	0.26	0.573	1	27.43	0.737514	0	0	3
1-pentanol	298.15	78.6	0.023	88.15	411	38.97	0.2704	0.26	0.573	1	27.43	0.737514	0	0	3
1-pentanol	298.15	59.7	0.0171	88.15	411	38.97	0.2704	0.26	0.573	1	27.43	0.737514	0	0	3
1-pentanol	298.15	27.2	0.008	88.15	411	38.97	0.2704	0.26	0.573	1	27.43	0.737514	0	0	3
1-propanol	513.6	101.9	0.1052	60.096	370.3	51.75	0.2744	0.254	0.622	1	25.03	0.80823	0	0	1
1-propanol	504.2	96.1	0.0901	60.096	370.3	51.75	0.2744	0.254	0.622	1	25.03	0.80823	0	0	1
1-propanol	500.2	86	0.0767	60.096	370.3	51.75	0.2744	0.254	0.622	1	25.03	0.80823	0	0	1
1-propanol	494.8	90.3	0.08	60.096	370.3	51.75	0.2744	0.254	0.622	1	25.03	0.80823	0	0	1
1-propanol	488.7	79.3	0.0679	60.096	370.3	51.75	0.2744	0.254	0.622	1	25.03	0.80823	0	0	1
1-propanol	486.6	86.7	0.0727	60.096	370.3	51.75	0.2744	0.254	0.622	1	25.03	0.80823	0	0	1
1-propanol	475.6	81.3	0.0646	60.096	370.3	51.75	0.2744	0.254	0.622	1	25.03	0.80823	0	0	1
1-propanol	474.6	73.4	0.0578	60.096	370.3	51.75	0.2744	0.254	0.622	1	25.03	0.80823	0	0	1
1-propanol	463.5	76.6	0.0577	60.096	370.3	51.75	0.2744	0.254	0.622	1	25.03	0.80823	0	0	1
1-propanol	462.3	67.7	0.0524	60.096	370.3	51.75	0.2744	0.254	0.622	1	25.03	0.80823	0	0	1
1-propanol	452.5	73	0.0519	60.096	370.3	51.75	0.2744	0.254	0.622	1	25.03	0.80823	0	0	1
1-propanol	439.5	59.4	0.0438	60.096	370.3	51.75	0.2744	0.254	0.622	1	25.03	0.80823	0	0	1
1-propanol	433.2	65.8	0.0441	60.096	370.3	51.75	0.2744	0.254	0.622	1	25.03	0.80823	0	0	1
1-propanol	423.5	62.9	0.0407	60.096	370.3	51.75	0.2744	0.254	0.622	1	25.03	0.80823	0	0	1
1-propanol	412.5	59.7	0.0374	60.096	370.3	51.75	0.2744	0.254	0.622	1	25.03	0.80823	0	0	1
1-propanol	402.7	57.5	0.0344	60.096	370.3	51.75	0.2744	0.254	0.622	1	25.03	0.80823	0	0	1
1-propanol	387.9	54.3	0.0305	60.096	370.3	51.75	0.2744	0.254	0.622	1	25.03	0.80823	0	0	1
1-propanol	374.4	51.4	0.0277	60.096	370.3	51.75	0.2744	0.254	0.622	1	25.03	0.80823	0	0	1
1-propanol	373.15	97.7	0.0327	60.096	370.3	51.75	0.2744	0.254	0.622	1	25.03	0.80823	0	0	1
1-propanol	373.15	86.2	0.02891	60.096	370.3	51.75	0.2744	0.254	0.622	1	25.03	0.80823	0	0	1
1-propanol	373.15	47.5	0.0162	60.096	370.3	51.75	0.2744	0.254	0.622	1	25.03	0.80823	0	0	1
1-propanol	373.15	22.9	0.007441	60.096	370.3	51.75	0.2744	0.254	0.622	1	25.03	0.80823	0	0	1
1-propanol	363.7	49.2	0.0257	60.096	370.3	51.75	0.2744	0.254	0.622	1	25.03	0.80823	0	0	1
1-propanol	353.7	42.5	0.0213	60.096	370.3	51.75	0.2744	0.254	0.622	1	25.03	0.80823	0	0	1
1-propanol	348.4	47.1	0.0223	60.096	370.3	51.75	0.2744	0.254	0.622	1	25.03	0.80823	0	0	1
1-propanol	338.4	44.9	0.0214	60.096	370.3	51.75	0.2744	0.254	0.622	1	25.03	0.80823	0	0	1
1-propanol	326.1	43.5	0.0187	60.096	370.3	51.75	0.2744	0.254	0.622	1	25.03	0.80823	0	0	1
1-propanol	323.15	106	0.0266	60.096	370.3	51.75	0.2744	0.254	0.622	1	25.03	0.80823	0	0	1
1-propanol	323.15	74.7	0.01915	60.096	370.3	51.75	0.2744	0.254	0.622	1	25.03	0.80823	0	0	1
1-propanol	323.15	51.8	0.01357	60.096	370.3	51.75	0.2744	0.254	0.622	1	25.03	0.80823	0	0	1
1-propanol	323.15	36	0.00949	60.096	370.3	51.75	0.2744	0.254	0.622	1	25.03	0.80823	0	0	1
1-propanol	323.15	23.7	0.006296	60.096	370.3	51.75	0.2744	0.254	0.622	1	25.03	0.80823	0	0	1
1-propanol	301	36.4	0.0111	60.096	370.3	51.75	0.2744	0.254	0.622	1	25.03	0.80823	0	0	1
1-propanol	299.9	41.3	0.0119	60.096	370.3	51.75	0.2744	0.254	0.622	1	25.03	0.80823	0	0	1
1-propanol	298.15	99.3	0.022	60.096	370.3	51.75	0.2744	0.254	0.622	1	25.03	0.80823	0	0	1
1-propanol	298.15	77.4	0.0176	60.096	370.3	51.75	0.2744	0.254	0.622	1	25.03	0.80823	0	0	1
1-propanol	298.15	49.8	0.01153	60.096	370.3	51.75	0.2744	0.254	0.622	1	25.03	0.80823	0	0	1
1-propanol	298.15	24.6	0.005824	60.096	370.3	51.75	0.2744	0.254	0.622	1	25.03	0.80823	0	0	1
1-propanol	291	30.4	0.0074	60.096	370.3	51.75	0.2744	0.254	0.622	1	25.03	0.80823	0	0	1
1-propanol	291	22.5	0.0054	60.096	370.3	51.75	0.2744	0.254	0.622	1	25.03	0.80823	0	0	1
1-propanol	291	17.8	0.0044	60.096	370.3	51.75	0.2744	0.254	0.622	1	25.03	0.80823	0	0	1
1-propanol	291	12.7	0.0031	60.096	370.3	51.75	0.2744	0.254	0.622	1	25.03	0.80823	0	0	1
1-propyl acetate	291	40.9	0.0166	102.133	374.7	33.6	0.296	0.254	0.389	2	34.7	0.757925	0	1	1
1-propyl acetate	291	31	0.0129	102.133	374.7	33.6	0.296	0.254	0.389	2	34.7	0.757925	0	1	1
1-propyl acetate	291	23.5	0.0098	102.133	374.7	33.6	0.296	0.254	0.389	2	34.7	0.757925	0	1	1
1-propyl acetate	291	15.9	0.0073	102.133	374.7	33.6	0.296	0.254	0.389	2	34.7	0.757925	0	1	1
2,2,4-trimethylpentane	348.15	66.67	0.00869	114.231	372.39	25.7	0.2441	0.266	0.303	0	9.6	0	0	0	10
2,2,4-trimethylpentane	348.15	52.28	0.0108	114.231	372.39	25.7	0.2441	0.266	0.303	0	9.6	0	0	0	10
2,2,4-trimethylpentane	348.15	35.77	0.0155	114.231	372.39	25.7	0.2441	0.266	0.303	0	9.6	0	0	0	10
2,2,4-trimethylpentane	323.15	62.82	0.00401	114.231	372.39	25.7	0.2441	0.266	0.303	0	9.6	0	0	0	10
2,2,4-trimethylpentane	323.15	45.8	0.00506	114.231	372.39	25.7	0.2441	0.266	0.303	0	9.6	0	0	0	10
2,2,4-trimethylpentane	323.15	33.34	0.00677	114.231	372.39	25.7	0.2441	0.266	0.303	0	9.6	0	0	0	10
2,2,4-trimethylpentane	308.15	1.01	0.0008258	114.231	372.39	25.7	0.2441	0.266	0.303	0	9.6	0	0	0	10
2,2,4-trimethylpentane	298.15	1.01	0.0007815	114.231	372.39	25.7	0.2441	0.266	0.303	0	9.6	0	0	0	10
2,2,4-trimethylpentane	295	207.8	0.1452	114.231	372.39	25.7	0.2441	0.266	0.303	0	9.6	0	0	0	10
2,2,4-trimethylpentane	295	173.3	0.1261	114.231	372.39	25.7	0.2441	0.266	0.303	0	9.6	0	0	0	10
2,2,4-trimethylpentane	295	138.8	0.1013	114.231	372.39	25.7	0.2441	0.266	0.303	0	9.6	0	0	0	10
2,2,4-trimethylpentane	295	104.4	0.0774	114.231	372.39	25.7	0.2441	0.266	0.303	0	9.6	0	0	0	10
2,2,4-trimethylpentane	295	69.9	0.052	114.231	372.39	25.7	0.2441	0.266	0.303	0	9.6	0	0	0	10
2,2,4-trimethylpentane	273.15	1.01	0.0006779	114.231	372.39	25.7	0.2441	0.266	0.303	0	9.6	0	0	0	10
2,2,4-trimethylpentane	248.15	1.01	0.0005801	114.231	372.39	25.7	0.2441	0.266	0.303	0	9.6	0	0	0	10
2,3-dimethylbutane	483.15	75.1	0.12728	86.177	331.13	31.5	0.2387	0.274	0.25	0	7.2	0	0	0	6
2,3-dimethylbutane	483.15	66.05	0.10488	86.177	331.13	31.5	0.2387	0.274	0.25	0	7.2	0	0	0	6
2,3-dimethylbutane	483.15	55.03	0.07759	86.177	331.13	31.5	0.2387	0.274	0.25	0	7.2	0	0	0	6
2,3-dimethylbutane	483.15	43.79	0.04901	86.177	331.13	31.5	0.2387	0.274	0.25	0	7.2	0	0	0	6
2,3-dimethylbutane	483.15	35.01	0.02679	86.177	331.13	31.5	0.2387	0.274	0.25	0	7.2	0	0	0	6
2,3-dimethylbutane	473.15	80.53	0.12728	86.177	331.13	31.5	0.2387	0.274	0.25	0	7.2	0	0	0	6
2,3-dimethylbutane	473.15	69.66	0.10488	86.177	331.13	31.5	0.2387	0.274	0.25	0	7.2	0	0	0	6
2,3-dimethylbutane	473.15	56.62	0.07759	86.177	331.13	31.5	0.2387	0.274	0.25	0	7.2	0	0	0	6
2,3-dimethylbutane	473.15	43.36	0.04901	86.177	331.13	31.5	0.2387	0.274	0.25	0	7.2	0	0	0	6
2,3-dimethylbutane	473.15	33.2	0.02679	86.177	331.13	31.5	0.2387	0.274	0.25	0	7.2	0	0	0	6
2,3-dimethylbutane	463.15	85.14	0.12728	86.177	331.13	31.5	0.2387	0.274	0.25	0	7.2	0	0	0	6
2,3-dimethylbutane	463.15	72.72	0.10488	86.177	331.13	31.5	0.2387	0.274	0.25	0	7.2	0	0	0	6
2,3-dimethylbutane	463.15	57.94	0.07759	86.177	331.13	31.5	0.2387	0.274	0.25	0	7.2	0	0	0	6
2,3-dimethylbutane	463.15	43	0.04901	86.177	331.13	31.5	0.2387	0.274	0.25	0	7.2	0	0	0	6
2,3-dimethylbutane	463.15	31.58	0.02679	86.177	331.13	31.5	0.2387	0.274	0.25	0	7.2	0	0	0	6
2,3-dimethylbutane	453.15	89.51	0.12728	86.177	331.13	31.5	0.2387	0.274	0.25	0	7.2	0	0	0	6
2,3-dimethylbutane	453.15	75.7	0.10488	86.177	331.13	31.5	0.2387	0.274	0.25	0	7.2	0	0	0	6
2,3-dimethylbutane	453.15	59.28	0.07759	86.177	331.13	31.5	0.2387	0.274	0.25	0	7.2	0	0	0	6
2,3-dimethylbutane	453.15	42.77	0.04901	86.177	331.13	31.5	0.2387	0.274	0.25	0	7.2	0	0	0	6
2,3-dimethylbutane	453.15	30.21	0.02679	86.177	331.13	31.5	0.2387	0.274	0.25	0	7.2	0	0	0	6
2,3-dimethylbutane	443.15	93.91	0.12728	86.177	331.13	31.5	0.2387	0.274	0.25	0	7.2	0	0	0	6
2,3-dimethylbutane	443.15	78.74	0.10488	86.177	331.13	31.5	0.2387	0.274	0.25	0	7.2	0	0	0	6
2,3-dimethylbutane	443.15	60.79	0.07759	86.177	331.13	31.5	0.2387	0.274	0.25	0	7.2	0	0	0	6
2,3-dimethylbutane	443.15	42.77	0.04901	86.177	331.13	31.5	0.2387	0.274	0.25	0	7.2	0	0	0	6
2,3-dimethylbutane	443.15	29.1	0.02679	86.177	331.13	31.5	0.2387	0.274	0.25	0	7.2	0	0	0	6
2,3-dimethylbutane	433.15	101.9	0.12728	86.177	331.13	31.5	0.2387	0.274	0.25	0	7.2	0	0	0	6
2,3-dimethylbutane	433.15	81.96	0.10488	86.177	331.13	31.5	0.2387	0.274	0.25	0	7.2	0	0	0	6
2,3-dimethylbutane	433.15	62.51	0.07759	86.177	331.13	31.5	0.2387	0.274	0.25	0	7.2	0	0	0	6
2,3-dimethylbutane	433.15	43	0.04901	86.177	331.13	31.5	0.2387	0.274	0.25	0	7.2	0	0	0	6
2,3-dimethylbutane	433.15	28.24	0.02679	86.177	331.13	31.5	0.2387	0.274	0.25	0	7.2	0	0	0	6
2,3-dimethylbutane	423.15	103.23	0.12728	86.177	331.13	31.5	0.2387	0.274	0.25	0	7.2	0	0	0	6
2,3-dimethylbutane	423.15	85.45	0.10488	86.177	331.13	31.5	0.2387	0.274	0.25	0	7.2	0	0	0	6
2,3-dimethylbutane	423.15	64.45	0.07759	86.177	331.13	31.5	0.2387	0.274	0.25	0	7.2	0	0	0	6
2,3-dimethylbutane	423.15	43.48	0.04901	86.177	331.13	31.5	0.2387	0.274	0.25	0	7.2	0	0	0	6
2,3-dimethylbutane	423.15	27.65	0.02679	86.177	331.13	31.5	0.2387	0.274	0.25	0	7.2	0	0	0	6
2,3-dimethylbutane	413.15	108.31	0.12728	86.177	331.13	31.5	0.2387	0.274	0.25	0	7.2	0	0	0	6
2,3-dimethylbutane	413.15	89.16	0.10488	86.177	331.13	31.5	0.2387	0.274	0.25	0	7.2	0	0	0	6
2,3-dimethylbutane	413.15	66.67	0.07759	86.177	331.13	31.5	0.2387	0.274	0.25	0	7.2	0	0	0	6
2,3-dimethylbutane	413.15	44.22	0.04901	86.177	331.13	31.5	0.2387	0.274	0.25	0	7.2	0	0	0	6
2,3-dimethylbutane	413.15	27.29	0.02679	86.177	331.13	31.5	0.2387	0.274	0.25	0	7.2	0	0	0	6
2,3-dimethylbutane	403.15	113.94	0.12728	86.177	331.13	31.5	0.2387	0.274	0.25	0	7.2	0	0	0	6
2,3-dimethylbutane	403.15	93.36	0.10488	86.177	331.13	31.5	0.2387	0.274	0.25	0	7.2	0	0	0	6
2,3-dimethylbutane	403.15	69.28	0.07759	86.177	331.13	31.5	0.2387	0.274	0.25	0	7.2	0	0	0	6
2,3-dimethylbutane	403.15	45.26	0.04901	86.177	331.13	31.5	0.2387	0.274	0.25	0	7.2	0	0	0	6
2,3-dimethylbutane	403.15	27.16	0.02679	86.177	331.13	31.5	0.2387	0.274	0.25	0	7.2	0	0	0	6
2,3-dimethylbutane	393.15	119.46	0.12728	86.177	331.13	31.5	0.2387	0.274	0.25	0	7.2	0	0	0	6
2,3-dimethylbutane	393.15	97.59	0.10488	86.177	331.13	31.5	0.2387	0.274	0.25	0	7.2	0	0	0	6
2,3-dimethylbutane	393.15	72.32	0.07759	86.177	331.13	31.5	0.2387	0.274	0.25	0	7.2	0	0	0	6
2,3-dimethylbutane	393.15	46.44	0.04901	86.177	331.13	31.5	0.2387	0.274	0.25	0	7.2	0	0	0	6
2,3-dimethylbutane	393.15	27.27	0.02679	86.177	331.13	31.5	0.2387	0.274	0.25	0	7.2	0	0	0	6
2,3-dimethylbutane	383.15	125.6	0.12728	86.177	331.13	31.5	0.2387	0.274	0.25	0	7.2	0	0	0	6
2,3-dimethylbutane	383.15	102.32	0.10488	86.177	331.13	31.5	0.2387	0.274	0.25	0	7.2	0	0	0	6
2,3-dimethylbutane	383.15	75.05	0.07759	86.177	331.13	31.5	0.2387	0.274	0.25	0	7.2	0	0	0	6
2,3-dimethylbutane	383.15	47.95	0.04901	86.177	331.13	31.5	0.2387	0.274	0.25	0	7.2	0	0	0	6
2,3-dimethylbutane	383.15	27.59	0.02679	86.177	331.13	31.5	0.2387	0.274	0.25	0	7.2	0	0	0	6
2,3-dimethylbutane	373.15	132.24	0.12728	86.177	331.13	31.5	0.2387	0.274	0.25	0	7.2	0	0	0	6
2,3-dimethylbutane	373.15	107.45	0.10488	86.177	331.13	31.5	0.2387	0.274	0.25	0	7.2	0	0	0	6
2,3-dimethylbutane	373.15	78.47	0.07759	86.177	331.13	31.5	0.2387	0.274	0.25	0	7.2	0	0	0	6
2,3-dimethylbutane	373.15	49.69	0.04901	86.177	331.13	31.5	0.2387	0.274	0.25	0	7.2	0	0	0	6
2,3-dimethylbutane	373.15	27.79	0.02679	86.177	331.13	31.5	0.2387	0.274	0.25	0	7.2	0	0	0	6
2,3-dimethylbutane	363.15	139.37	0.12728	86.177	331.13	31.5	0.2387	0.274	0.25	0	7.2	0	0	0	6
2,3-dimethylbutane	363.15	113.02	0.10488	86.177	331.13	31.5	0.2387	0.274	0.25	0	7.2	0	0	0	6
2,3-dimethylbutane	363.15	82.2	0.07759	86.177	331.13	31.5	0.2387	0.274	0.25	0	7.2	0	0	0	6
2,3-dimethylbutane	363.15	51.7	0.04901	86.177	331.13	31.5	0.2387	0.274	0.25	0	7.2	0	0	0	6
2,3-dimethylbutane	363.15	28.85	0.02679	86.177	331.13	31.5	0.2387	0.274	0.25	0	7.2	0	0	0	6
2,3-dimethylbutane	353.15	147.15	0.12728	86.177	331.13	31.5	0.2387	0.274	0.25	0	7.2	0	0	0	6
2,3-dimethylbutane	353.15	119.08	0.10488	86.177	331.13	31.5	0.2387	0.274	0.25	0	7.2	0	0	0	6
2,3-dimethylbutane	353.15	86.36	0.07759	86.177	331.13	31.5	0.2387	0.274	0.25	0	7.2	0	0	0	6
2,3-dimethylbutane	353.15	53.98	0.04901	86.177	331.13	31.5	0.2387	0.274	0.25	0	7.2	0	0	0	6
2,3-dimethylbutane	353.15	29.77	0.02679	86.177	331.13	31.5	0.2387	0.274	0.25	0	7.2	0	0	0	6
2,3-dimethylbutane	343.15	155.41	0.12728	86.177	331.13	31.5	0.2387	0.274	0.25	0	7.2	0	0	0	6
2,3-dimethylbutane	343.15	125.65	0.10488	86.177	331.13	31.5	0.2387	0.274	0.25	0	7.2	0	0	0	6
2,3-dimethylbutane	343.15	90.59	0.07759	86.177	331.13	31.5	0.2387	0.274	0.25	0	7.2	0	0	0	6
2,3-dimethylbutane	343.15	56.52	0.04901	86.177	331.13	31.5	0.2387	0.274	0.25	0	7.2	0	0	0	6
2,3-dimethylbutane	343.15	30.94	0.02679	86.177	331.13	31.5	0.2387	0.274	0.25	0	7.2	0	0	0	6
2,3-dimethylbutane	333.15	164.49	0.12728	86.177	331.13	31.5	0.2387	0.274	0.25	0	7.2	0	0	0	6
2,3-dimethylbutane	333.15	132.74	0.10488	86.177	331.13	31.5	0.2387	0.274	0.25	0	7.2	0	0	0	6
2,3-dimethylbutane	333.15	95.83	0.07759	86.177	331.13	31.5	0.2387	0.274	0.25	0	7.2	0	0	0	6
2,3-dimethylbutane	333.15	59.36	0.04901	86.177	331.13	31.5	0.2387	0.274	0.25	0	7.2	0	0	0	6
2,3-dimethylbutane	333.15	32.22	0.02679	86.177	331.13	31.5	0.2387	0.274	0.25	0	7.2	0	0	0	6
2,3-dimethylbutane	323.15	140.5	0.10488	86.177	331.13	31.5	0.2387	0.274	0.25	0	7.2	0	0	0	6
2,3-dimethylbutane	323.15	101.2	0.07759	86.177	331.13	31.5	0.2387	0.274	0.25	0	7.2	0	0	0	6
2,3-dimethylbutane	323.15	62.51	0.04901	86.177	331.13	31.5	0.2387	0.274	0.25	0	7.2	0	0	0	6
2,3-dimethylbutane	323.15	33.78	0.02679	86.177	331.13	31.5	0.2387	0.274	0.25	0	7.2	0	0	0	6
2,3-dimethylbutane	313.15	149.06	0.10488	86.177	331.13	31.5	0.2387	0.274	0.25	0	7.2	0	0	0	6
2,3-dimethylbutane	313.15	107.07	0.07759	86.177	331.13	31.5	0.2387	0.274	0.25	0	7.2	0	0	0	6
2,3-dimethylbutane	313.15	66	0.04901	86.177	331.13	31.5	0.2387	0.274	0.25	0	7.2	0	0	0	6
2,3-dimethylbutane	313.15	35.49	0.02679	86.177	331.13	31.5	0.2387	0.274	0.25	0	7.2	0	0	0	6
2,3-dimethylbutane	308.15	153.54	0.10488	86.177	331.13	31.5	0.2387	0.274	0.25	0	7.2	0	0	0	6
2,3-dimethylbutane	308.15	110.32	0.07759	86.177	331.13	31.5	0.2387	0.274	0.25	0	7.2	0	0	0	6
2,3-dimethylbutane	308.15	67.86	0.04901	86.177	331.13	31.5	0.2387	0.274	0.25	0	7.2	0	0	0	6
2,3-dimethylbutane	308.15	36.44	0.02679	86.177	331.13	31.5	0.2387	0.274	0.25	0	7.2	0	0	0	6
2-aminoethanol	423.15	117.2	0.01342	61.084	444.15	68.55	0.2715	0.274	0.287	2	51.05	0.905975	0	0	0
2-aminoethanol	423.15	69.9	0.00792	61.084	444.15	68.55	0.2715	0.274	0.287	2	51.05	0.905975	0	0	0
2-aminoethanol	423.15	54.6	0.006214	61.084	444.15	68.55	0.2715	0.274	0.287	2	51.05	0.905975	0	0	0
2-aminoethanol	423.15	43.5	0.0049	61.084	444.15	68.55	0.2715	0.274	0.287	2	51.05	0.905975	0	0	0
2-aminoethanol	423.15	41.3	0.00478	61.084	444.15	68.55	0.2715	0.274	0.287	2	51.05	0.905975	0	0	0
2-aminoethanol	423.15	40.4	0.00467	61.084	444.15	68.55	0.2715	0.274	0.287	2	51.05	0.905975	0	0	0
2-aminoethanol	398.15	90.8	0.00898	61.084	444.15	68.55	0.2715	0.274	0.287	2	51.05	0.905975	0	0	0
2-aminoethanol	398.15	76.7	0.00756	61.084	444.15	68.55	0.2715	0.274	0.287	2	51.05	0.905975	0	0	0
2-aminoethanol	398.15	68	0.00669	61.084	444.15	68.55	0.2715	0.274	0.287	2	51.05	0.905975	0	0	0
2-aminoethanol	373.15	82.9	0.00668	61.084	444.15	68.55	0.2715	0.274	0.287	2	51.05	0.905975	0	0	0
2-aminoethanol	373.15	70.5	0.00563	61.084	444.15	68.55	0.2715	0.274	0.287	2	51.05	0.905975	0	0	0
2-aminoethanol	373.15	59.9	0.0049	61.084	444.15	68.55	0.2715	0.274	0.287	2	51.05	0.905975	0	0	0
2-aminoethanol	373.15	48.5	0.00391	61.084	444.15	68.55	0.2715	0.274	0.287	2	51.05	0.905975	0	0	0
2-aminoethanol	373.15	33.1	0.00265	61.084	444.15	68.55	0.2715	0.274	0.287	2	51.05	0.905975	0	0	0
2-aminoethanol	348.15	106.2	0.00699	61.084	444.15	68.55	0.2715	0.274	0.287	2	51.05	0.905975	0	0	0
2-aminoethanol	348.15	94.4	0.00614	61.084	444.15	68.55	0.2715	0.274	0.287	2	51.05	0.905975	0	0	0
2-aminoethanol	348.15	73.4	0.00477	61.084	444.15	68.55	0.2715	0.274	0.287	2	51.05	0.905975	0	0	0
2-aminoethanol	348.15	69.1	0.00449	61.084	444.15	68.55	0.2715	0.274	0.287	2	51.05	0.905975	0	0	0
2-aminoethanol	323.15	159.3	0.00841	61.084	444.15	68.55	0.2715	0.274	0.287	2	51.05	0.905975	0	0	0
2-aminoethanol	323.15	117.9	0.00634	61.084	444.15	68.55	0.2715	0.274	0.287	2	51.05	0.905975	0	0	0
2-aminoethanol	323.15	97.1	0.00529	61.084	444.15	68.55	0.2715	0.274	0.287	2	51.05	0.905975	0	0	0
2-aminoethanol	323.15	74.7	0.00397	61.084	444.15	68.55	0.2715	0.274	0.287	2	51.05	0.905975	0	0	0
2-aminoethanol	323.15	50.8	0.0027	61.084	444.15	68.55	0.2715	0.274	0.287	2	51.05	0.905975	0	0	0
2-aminoethanol	323.15	30.7	0.00161	61.084	444.15	68.55	0.2715	0.274	0.287	2	51.05	0.905975	0	0	0
2-butanol	373.15	100	0.0419	74.123	372	41.79	0.2755	0.252	0.572	1	26.23	0.771254	0	0	2
2-butanol	373.15	52.6	0.02266	74.123	372	41.79	0.2755	0.252	0.572	1	26.23	0.771254	0	0	2
2-butanol	373.15	19.8	0.00851	74.123	372	41.79	0.2755	0.252	0.572	1	26.23	0.771254	0	0	2
2-butanol	323.15	98.6	0.03	74.123	372	41.79	0.2755	0.252	0.572	1	26.23	0.771254	0	0	2
2-butanol	323.15	50.7	0.0158	74.123	372	41.79	0.2755	0.252	0.572	1	26.23	0.771254	0	0	2
2-butanol	323.15	30.1	0.0093	74.123	372	41.79	0.2755	0.252	0.572	1	26.23	0.771254	0	0	2
2-butanol	298.15	98.6	0.0261	74.123	372	41.79	0.2755	0.252	0.572	1	26.23	0.771254	0	0	2
2-butanol	298.15	76.8	0.0205	74.123	372	41.79	0.2755	0.252	0.572	1	26.23	0.771254	0	0	2
2-butanol	298.15	52.1	0.0139	74.123	372	41.79	0.2755	0.252	0.572	1	26.23	0.771254	0	0	2
2-butanol	298.15	28.1	0.0075	74.123	372	41.79	0.2755	0.252	0.572	1	26.23	0.771254	0	0	2
2-butoxyethanol	373.15	84	0.03815	118.176	444.2	32.7	0.279	0.263	0.521	2	39.06	0.754224	0	0	2
2-butoxyethanol	373.15	65.9	0.03031	118.176	444.2	32.7	0.279	0.263	0.521	2	39.06	0.754224	0	0	2
2-butoxyethanol	373.15	36.2	0.01701	118.176	444.2	32.7	0.279	0.263	0.521	2	39.06	0.754224	0	0	2
2-butoxyethanol	323.15	102.7	0.03367	118.176	444.2	32.7	0.279	0.263	0.521	2	39.06	0.754224	0	0	2
2-butoxyethanol	323.15	77.1	0.02608	118.176	444.2	32.7	0.279	0.263	0.521	2	39.06	0.754224	0	0	2
2-butoxyethanol	323.15	56.8	0.01954	118.176	444.2	32.7	0.279	0.263	0.521	2	39.06	0.754224	0	0	2
2-butoxyethanol	323.15	35.5	0.01245	118.176	444.2	32.7	0.279	0.263	0.521	2	39.06	0.754224	0	0	2
2-butoxyethanol	323.15	34.4	0.01207	118.176	444.2	32.7	0.279	0.263	0.521	2	39.06	0.754224	0	0	2
2-butoxyethanol	298.15	84.4	0.02484	118.176	444.2	32.7	0.279	0.263	0.521	2	39.06	0.754224	0	0	2
2-butoxyethanol	298.15	70.7	0.02086	118.176	444.2	32.7	0.279	0.263	0.521	2	39.06	0.754224	0	0	2
2-butoxyethanol	298.15	63.8	0.01911	118.176	444.2	32.7	0.279	0.263	0.521	2	39.06	0.754224	0	0	2
2-butoxyethanol	298.15	44.1	0.01341	118.176	444.2	32.7	0.279	0.263	0.521	2	39.06	0.754224	0	0	2
2-ethoxyethanol	373.15	102	0.0323	90.122	408.3	43.12	0.3079	0.258	0.475	2	36.66	0.803601	0	0	0
2-ethoxyethanol	373.15	101.7	0.0326	90.122	408.3	43.12	0.3079	0.258	0.475	2	36.66	0.803601	0	0	0
2-ethoxyethanol	373.15	56.1	0.0188	90.122	408.3	43.12	0.3079	0.258	0.475	2	36.66	0.803601	0	0	0
2-ethoxyethanol	323.15	103	0.0241	90.122	408.3	43.12	0.3079	0.258	0.475	2	36.66	0.803601	0	0	0
2-ethoxyethanol	323.15	75.6	0.01848	90.122	408.3	43.12	0.3079	0.258	0.475	2	36.66	0.803601	0	0	0
2-ethoxyethanol	323.15	66	0.01601	90.122	408.3	43.12	0.3079	0.258	0.475	2	36.66	0.803601	0	0	0
2-ethoxyethanol	323.15	41.4	0.01049	90.122	408.3	43.12	0.3079	0.258	0.475	2	36.66	0.803601	0	0	0
2-ethoxyethanol	323.15	26.2	0.006192	90.122	408.3	43.12	0.3079	0.258	0.475	2	36.66	0.803601	0	0	0
2-ethoxyethanol	298.15	108.2	0.0216	90.122	408.3	43.12	0.3079	0.258	0.475	2	36.66	0.803601	0	0	0
2-ethoxyethanol	298.15	59.3	0.01247	90.122	408.3	43.12	0.3079	0.258	0.475	2	36.66	0.803601	0	0	0
2-ethoxyethanol	298.15	40.4	0.008661	90.122	408.3	43.12	0.3079	0.258	0.475	2	36.66	0.803601	0	0	0
2-ethoxyethanol	298.15	23.9	0.005241	90.122	408.3	43.12	0.3079	0.258	0.475	2	36.66	0.803601	0	0	0
2-ethylhexanol-1	393.15	46.1	0.02877	130.23	456	28	0.257	0.266	0.556	1	29.83	0.678176	0	0	6
2-ethylhexanol-1	393.15	26.9	0.01713	130.23	456	28	0.257	0.266	0.556	1	29.83	0.678176	0	0	6
2-ethylhexanol-1	373.15	96.5	0.0524	130.23	456	28	0.257	0.266	0.556	1	29.83	0.678176	0	0	6
2-ethylhexanol-1	373.15	62.6	0.0349	130.23	456	28	0.257	0.266	0.556	1	29.83	0.678176	0	0	6
2-ethylhexanol-1	323.15	97.8	0.041	130.23	456	28	0.257	0.266	0.556	1	29.83	0.678176	0	0	6
2-ethylhexanol-1	323.15	50.3	0.0222	130.23	456	28	0.257	0.266	0.556	1	29.83	0.678176	0	0	6
2-ethylhexanol-1	298.15	94.6	0.0343	130.23	456	28	0.257	0.266	0.556	1	29.83	0.678176	0	0	6
2-ethylhexanol-1	298.15	77.4	0.0289	130.23	456	28	0.257	0.266	0.556	1	29.83	0.678176	0	0	6
2-ethylhexanol-1	298.15	44.2	0.01708	130.23	456	28	0.257	0.266	0.556	1	29.83	0.678176	0	0	6
2-ethylhexanol-1	298.15	34.3	0.01321	130.23	456	28	0.257	0.266	0.556	1	29.83	0.678176	0	0	6
2-ethylhexanol-1	298.15	19.72	0.00758	130.23	456	28	0.257	0.266	0.556	1	29.83	0.678176	0	0	6
2-methoxyethanol	373.15	87.8	0.02117	76.095	397.6	50.84	0.3144	0.262	0.387	2	35.46	0.830795	0	0	0
2-methoxyethanol	373.15	45.4	0.011	76.095	397.6	50.84	0.3144	0.262	0.387	2	35.46	0.830795	0	0	0
2-methoxyethanol	373.15	27.5	0.0067	76.095	397.6	50.84	0.3144	0.262	0.387	2	35.46	0.830795	0	0	0
2-methoxyethanol	323.15	81	0.01399	76.095	397.6	50.84	0.3144	0.262	0.387	2	35.46	0.830795	0	0	0
2-methoxyethanol	323.15	71.6	0.01253	76.095	397.6	50.84	0.3144	0.262	0.387	2	35.46	0.830795	0	0	0
2-methoxyethanol	323.15	56.5	0.009865	76.095	397.6	50.84	0.3144	0.262	0.387	2	35.46	0.830795	0	0	0
2-methoxyethanol	323.15	33.6	0.005911	76.095	397.6	50.84	0.3144	0.262	0.387	2	35.46	0.830795	0	0	0
2-methoxyethanol	298.15	101	0.0143	76.095	397.6	50.84	0.3144	0.262	0.387	2	35.46	0.830795	0	0	0
2-methoxyethanol	298.15	56.9	0.0082	76.095	397.6	50.84	0.3144	0.262	0.387	2	35.46	0.830795	0	0	0
2-methoxyethanol	298.15	34.2	0.0049	76.095	397.6	50.84	0.3144	0.262	0.387	2	35.46	0.830795	0	0	0
2-methyl-1-propanol	373.15	88.9	0.0354	74.123	380.8	43	0.2715	0.258	0.585	1	26.23	0.771254	0	0	3
2-methyl-1-propanol	373.15	26.5	0.0111	74.123	380.8	43	0.2715	0.258	0.585	1	26.23	0.771254	0	0	3
2-methyl-1-propanol	323.15	82.5	0.0255	74.123	380.8	43	0.2715	0.258	0.585	1	26.23	0.771254	0	0	3
2-methyl-1-propanol	323.15	34.5	0.0113	74.123	380.8	43	0.2715	0.258	0.585	1	26.23	0.771254	0	0	3
2-methyl-1-propanol	298.15	97.2	0.0263	74.123	380.8	43	0.2715	0.258	0.585	1	26.23	0.771254	0	0	3
2-methyl-1-propanol	298.15	52.8	0.0145	74.123	380.8	43	0.2715	0.258	0.585	1	26.23	0.771254	0	0	3
2-methyl-1-propanol	298.15	26.5	0.0014	74.123	380.8	43	0.2715	0.258	0.585	1	26.23	0.771254	0	0	3
2-methylbutanal	383.15	101.3	0.097	86.134	365	39.2	0.275	0.259	0.451	1	24.27	0.703337	1	1	4
2-methylbutanal	383.15	81	0.082	86.134	365	39.2	0.275	0.259	0.451	1	24.27	0.703337	1	1	4
2-methylbutanal	383.15	50.7	0.055	86.134	365	39.2	0.275	0.259	0.451	1	24.27	0.703337	1	1	4
2-methylbutanal	383.15	10.1	0.01	86.134	365	39.2	0.275	0.259	0.451	1	24.27	0.703337	1	1	4
2-methylbutanal	383.15	5.1	0.0035	86.134	365	39.2	0.275	0.259	0.451	1	24.27	0.703337	1	1	4
2-methylbutanal	363.15	101.3	0.091	86.134	365	39.2	0.275	0.259	0.451	1	24.27	0.703337	1	1	4
2-methylbutanal	363.15	81	0.07	86.134	365	39.2	0.275	0.259	0.451	1	24.27	0.703337	1	1	4
2-methylbutanal	363.15	50.7	0.05	86.134	365	39.2	0.275	0.259	0.451	1	24.27	0.703337	1	1	4
2-methylbutanal	363.15	10.1	0.0102	86.134	365	39.2	0.275	0.259	0.451	1	24.27	0.703337	1	1	4
2-methylbutanal	363.15	5.1	0.0046	86.134	365	39.2	0.275	0.259	0.451	1	24.27	0.703337	1	1	4
2-methylbutanal	363.15	1	0.0001	86.134	365	39.2	0.275	0.259	0.451	1	24.27	0.703337	1	1	4
2-methylbutanal	343.15	101.3	0.08	86.134	365	39.2	0.275	0.259	0.451	1	24.27	0.703337	1	1	4
2-methylbutanal	343.15	81	0.071	86.134	365	39.2	0.275	0.259	0.451	1	24.27	0.703337	1	1	4
2-methylbutanal	343.15	50.7	0.047	86.134	365	39.2	0.275	0.259	0.451	1	24.27	0.703337	1	1	4
2-methylbutanal	343.15	10.1	0.01	86.134	365	39.2	0.275	0.259	0.451	1	24.27	0.703337	1	1	4
2-methylbutanal	343.15	5.1	0.0048	86.134	365	39.2	0.275	0.259	0.451	1	24.27	0.703337	1	1	4
2-methylbutanal	343.15	1	0.0006	86.134	365	39.2	0.275	0.259	0.451	1	24.27	0.703337	1	1	4
2-methylbutanal	323.15	101.3	0.08	86.134	365	39.2	0.275	0.259	0.451	1	24.27	0.703337	1	1	4
2-methylbutanal	323.15	81	0.066	86.134	365	39.2	0.275	0.259	0.451	1	24.27	0.703337	1	1	4
2-methylbutanal	323.15	50.7	0.043	86.134	365	39.2	0.275	0.259	0.451	1	24.27	0.703337	1	1	4
2-methylbutanal	323.15	10.1	0.01	86.134	365	39.2	0.275	0.259	0.451	1	24.27	0.703337	1	1	4
2-methylbutanal	323.15	5.1	0.0047	86.134	365	39.2	0.275	0.259	0.451	1	24.27	0.703337	1	1	4
2-methylbutanal	323.15	1	0.0008	86.134	365	39.2	0.275	0.259	0.451	1	24.27	0.703337	1	1	4
2-methylbutanal	303.15	10.1	0.009	86.134	365	39.2	0.275	0.259	0.451	1	24.27	0.703337	1	1	4
2-methylbutanal	303.15	5.1	0.0045	86.134	365	39.2	0.275	0.259	0.451	1	24.27	0.703337	1	1	4
2-methylbutanal	303.15	1	0.001	86.134	365	39.2	0.275	0.259	0.451	1	24.27	0.703337	1	1	4
2-propanol	476.1	69.7	0.0365	60.096	355.5	47.64	0.273	0.248	0.669	1	25.03	0.80823	0	0	38
2-propanol	475.9	124.4	0.0637	60.096	355.5	47.64	0.273	0.248	0.669	1	25.03	0.80823	0	0	38
2-propanol	399.1	124.7	0.0501	60.096	355.5	47.64	0.273	0.248	0.669	1	25.03	0.80823	0	0	38
2-propanol	399.1	99.6	0.0395	60.096	355.5	47.64	0.273	0.248	0.669	1	25.03	0.80823	0	0	38
2-propanol	399.1	69.7	0.0305	60.096	355.5	47.64	0.273	0.248	0.669	1	25.03	0.80823	0	0	38
2-propanol	373.15	89.2	0.03446	60.096	355.5	47.64	0.273	0.248	0.669	1	25.03	0.80823	0	0	1
2-propanol	373.15	61.7	0.02403	60.096	355.5	47.64	0.273	0.248	0.669	1	25.03	0.80823	0	0	1
2-propanol	373.15	36.7	0.01429	60.096	355.5	47.64	0.273	0.248	0.669	1	25.03	0.80823	0	0	1
2-propanol	373.15	30.9	0.01201	60.096	355.5	47.64	0.273	0.248	0.669	1	25.03	0.80823	0	0	1
2-propanol	373.15	26.1	0.01021	60.096	355.5	47.64	0.273	0.248	0.669	1	25.03	0.80823	0	0	1
2-propanol	373.15	12	0.004289	60.096	355.5	47.64	0.273	0.248	0.669	1	25.03	0.80823	0	0	1
2-propanol	373.15	9.35	0.003198	60.096	355.5	47.64	0.273	0.248	0.669	1	25.03	0.80823	0	0	1
2-propanol	323.5	69.7	0.0199	60.096	355.5	47.64	0.273	0.248	0.669	1	25.03	0.80823	0	0	38
2-propanol	323.5	53	0.0139	60.096	355.5	47.64	0.273	0.248	0.669	1	25.03	0.80823	0	0	38
2-propanol	323.4	124.7	0.0347	60.096	355.5	47.64	0.273	0.248	0.669	1	25.03	0.80823	0	0	38
2-propanol	323.4	124.5	0.035	60.096	355.5	47.64	0.273	0.248	0.669	1	25.03	0.80823	0	0	38
2-propanol	323.4	99.6	0.0288	60.096	355.5	47.64	0.273	0.248	0.669	1	25.03	0.80823	0	0	38
2-propanol	323.4	53	0.0139	60.096	355.5	47.64	0.273	0.248	0.669	1	25.03	0.80823	0	0	38
2-propanol	323.15	92.4	0.02455	60.096	355.5	47.64	0.273	0.248	0.669	1	25.03	0.80823	0	0	1
2-propanol	323.15	83.1	0.02453	60.096	355.5	47.64	0.273	0.248	0.669	1	25.03	0.80823	0	0	1
2-propanol	323.15	73.3	0.02193	60.096	355.5	47.64	0.273	0.248	0.669	1	25.03	0.80823	0	0	1
2-propanol	323.15	53.3	0.01608	60.096	355.5	47.64	0.273	0.248	0.669	1	25.03	0.80823	0	0	1
2-propanol	323.15	40.4	0.01211	60.096	355.5	47.64	0.273	0.248	0.669	1	25.03	0.80823	0	0	1
2-propanol	323.15	27	0.008469	60.096	355.5	47.64	0.273	0.248	0.669	1	25.03	0.80823	0	0	1
2-propanol	323.15	24.3	0.007467	60.096	355.5	47.64	0.273	0.248	0.669	1	25.03	0.80823	0	0	1
2-propanol	323.15	12.2	0.003714	60.096	355.5	47.64	0.273	0.248	0.669	1	25.03	0.80823	0	0	1
2-propanol	323.15	6.98	0.00212	60.096	355.5	47.64	0.273	0.248	0.669	1	25.03	0.80823	0	0	1
2-propanol	298.15	97.2	0.02454	60.096	355.5	47.64	0.273	0.248	0.669	1	25.03	0.80823	0	0	1
2-propanol	298.15	74.2	0.01886	60.096	355.5	47.64	0.273	0.248	0.669	1	25.03	0.80823	0	0	1
2-propanol	298.15	63.5	0.01634	60.096	355.5	47.64	0.273	0.248	0.669	1	25.03	0.80823	0	0	1
2-propanol	298.15	45.2	0.01174	60.096	355.5	47.64	0.273	0.248	0.669	1	25.03	0.80823	0	0	1
2-propanol	298.15	45.1	0.01165	60.096	355.5	47.64	0.273	0.248	0.669	1	25.03	0.80823	0	0	1
2-propanol	298.15	36.5	0.009626	60.096	355.5	47.64	0.273	0.248	0.669	1	25.03	0.80823	0	0	1
2-propanol	298.15	21.2	0.005658	60.096	355.5	47.64	0.273	0.248	0.669	1	25.03	0.80823	0	0	1
2-propanol	298.15	20.2	0.005385	60.096	355.5	47.64	0.273	0.248	0.669	1	25.03	0.80823	0	0	1
2-propanol	298.15	15.9	0.00424	60.096	355.5	47.64	0.273	0.248	0.669	1	25.03	0.80823	0	0	1
2-propanol	298.15	10.8	0.002933	60.096	355.5	47.64	0.273	0.248	0.669	1	25.03	0.80823	0	0	1
2-propanol	298.15	10.2	0.002771	60.096	355.5	47.64	0.273	0.248	0.669	1	25.03	0.80823	0	0	1
2-propanol	298.15	7.51	0.002068	60.096	355.5	47.64	0.273	0.248	0.669	1	25.03	0.80823	0	0	1
2-propyl acetate	291	30.4	0.0147	102.133	362	32.9	0.2925	0.26	0.368	2	34.7	0.757925	0	1	1
2-propyl acetate	291	23.8	0.0114	102.133	362	32.9	0.2925	0.26	0.368	2	34.7	0.757925	0	1	1
2-propyl acetate	291	18	0.0085	102.133	362	32.9	0.2925	0.26	0.368	2	34.7	0.757925	0	1	1
2-propyl acetate	291	13.1	0.0066	102.133	362	32.9	0.2925	0.26	0.368	2	34.7	0.757925	0	1	1
acetic acid	348.15	74	0.0203	60.053	391.2	57.86	0.3342	0.211	0.467	1	42.1	0.885986	0	1	0
acetic acid	348.15	68.8	0.0187	60.053	391.2	57.86	0.3342	0.211	0.467	1	42.1	0.885986	0	1	0
acetic acid	348.15	62.6	0.0174	60.053	391.2	57.86	0.3342	0.211	0.467	1	42.1	0.885986	0	1	0
acetic acid	348.15	56.7	0.0166	60.053	391.2	57.86	0.3342	0.211	0.467	1	42.1	0.885986	0	1	0
acetic acid	348.15	50.2	0.0154	60.053	391.2	57.86	0.3342	0.211	0.467	1	42.1	0.885986	0	1	0
acetic acid	348.15	43.6	0.0131	60.053	391.2	57.86	0.3342	0.211	0.467	1	42.1	0.885986	0	1	0
acetic acid	348.15	36.8	0.0115	60.053	391.2	57.86	0.3342	0.211	0.467	1	42.1	0.885986	0	1	0
acetic acid	348.15	29.6	0.0086	60.053	391.2	57.86	0.3342	0.211	0.467	1	42.1	0.885986	0	1	0
acetic acid	348.15	24	0.0072	60.053	391.2	57.86	0.3342	0.211	0.467	1	42.1	0.885986	0	1	0
acetic acid	348.15	17.8	0.0055	60.053	391.2	57.86	0.3342	0.211	0.467	1	42.1	0.885986	0	1	0
acetic acid	348.15	14	0.004	60.053	391.2	57.86	0.3342	0.211	0.467	1	42.1	0.885986	0	1	0
acetic acid	348.15	10.7	0.0037	60.053	391.2	57.86	0.3342	0.211	0.467	1	42.1	0.885986	0	1	0
acetic acid	348.15	8.1	0.003	60.053	391.2	57.86	0.3342	0.211	0.467	1	42.1	0.885986	0	1	0
acetic acid	348.15	6.3	0.0022	60.053	391.2	57.86	0.3342	0.211	0.467	1	42.1	0.885986	0	1	0
acetic acid	348.15	4.9	0.002	60.053	391.2	57.86	0.3342	0.211	0.467	1	42.1	0.885986	0	1	0
acetic acid	348.15	3.5	0.0016	60.053	391.2	57.86	0.3342	0.211	0.467	1	42.1	0.885986	0	1	0
acetic acid	348.15	2.7	0.0012	60.053	391.2	57.86	0.3342	0.211	0.467	1	42.1	0.885986	0	1	0
acetic acid	323.15	74.5	0.0215	60.053	391.2	57.86	0.3342	0.211	0.467	1	42.1	0.885986	0	1	0
acetic acid	323.15	69.6	0.0194	60.053	391.2	57.86	0.3342	0.211	0.467	1	42.1	0.885986	0	1	0
acetic acid	323.15	64.9	0.0187	60.053	391.2	57.86	0.3342	0.211	0.467	1	42.1	0.885986	0	1	0
acetic acid	323.15	60.4	0.017	60.053	391.2	57.86	0.3342	0.211	0.467	1	42.1	0.885986	0	1	0
acetic acid	323.15	55.6	0.0158	60.053	391.2	57.86	0.3342	0.211	0.467	1	42.1	0.885986	0	1	0
acetic acid	323.15	50.7	0.0142	60.053	391.2	57.86	0.3342	0.211	0.467	1	42.1	0.885986	0	1	0
acetic acid	323.15	45.7	0.0128	60.053	391.2	57.86	0.3342	0.211	0.467	1	42.1	0.885986	0	1	0
acetic acid	323.15	40.6	0.0114	60.053	391.2	57.86	0.3342	0.211	0.467	1	42.1	0.885986	0	1	0
acetic acid	323.15	35.5	0.0099	60.053	391.2	57.86	0.3342	0.211	0.467	1	42.1	0.885986	0	1	0
acetic acid	323.15	30.5	0.0085	60.053	391.2	57.86	0.3342	0.211	0.467	1	42.1	0.885986	0	1	0
acetic acid	323.15	25.5	0.0073	60.053	391.2	57.86	0.3342	0.211	0.467	1	42.1	0.885986	0	1	0
acetic acid	323.15	21.7	0.0065	60.053	391.2	57.86	0.3342	0.211	0.467	1	42.1	0.885986	0	1	0
acetic acid	323.15	17.5	0.005	60.053	391.2	57.86	0.3342	0.211	0.467	1	42.1	0.885986	0	1	0
acetic acid	323.15	14.3	0.0041	60.053	391.2	57.86	0.3342	0.211	0.467	1	42.1	0.885986	0	1	0
acetic acid	298.15	70.4	0.0197	60.053	391.2	57.86	0.3342	0.211	0.467	1	42.1	0.885986	0	1	0
acetic acid	298.15	63.9	0.0175	60.053	391.2	57.86	0.3342	0.211	0.467	1	42.1	0.885986	0	1	0
acetic acid	298.15	58.2	0.0161	60.053	391.2	57.86	0.3342	0.211	0.467	1	42.1	0.885986	0	1	0
acetic acid	298.15	52	0.0144	60.053	391.2	57.86	0.3342	0.211	0.467	1	42.1	0.885986	0	1	0
acetic acid	298.15	46.2	0.0133	60.053	391.2	57.86	0.3342	0.211	0.467	1	42.1	0.885986	0	1	0
acetic acid	298.15	39.9	0.0117	60.053	391.2	57.86	0.3342	0.211	0.467	1	42.1	0.885986	0	1	0
acetic acid	298.15	33.5	0.0102	60.053	391.2	57.86	0.3342	0.211	0.467	1	42.1	0.885986	0	1	0
acetic acid	298.15	28.5	0.0088	60.053	391.2	57.86	0.3342	0.211	0.467	1	42.1	0.885986	0	1	0
acetic acid	298.15	24.7	0.0075	60.053	391.2	57.86	0.3342	0.211	0.467	1	42.1	0.885986	0	1	0
acetic acid	298.15	21	0.0067	60.053	391.2	57.86	0.3342	0.211	0.467	1	42.1	0.885986	0	1	0
acetic acid	298.15	17.4	0.0057	60.053	391.2	57.86	0.3342	0.211	0.467	1	42.1	0.885986	0	1	0
acetic acid	298.15	12.8	0.004	60.053	391.2	57.86	0.3342	0.211	0.467	1	42.1	0.885986	0	1	0
acetic acid	298.15	7.7	0.0029	60.053	391.2	57.86	0.3342	0.211	0.467	1	42.1	0.885986	0	1	0
acetic acid	298.15	5.5	0.0023	60.053	391.2	57.86	0.3342	0.211	0.467	1	42.1	0.885986	0	1	0
acetone	373.15	84.4	0.03914	58.08	329.3	47.02	0.2779	0.233	0.306	1	21.87	0.780521	0	2	1
acetone	373.15	69.7	0.03236	58.08	329.3	47.02	0.2779	0.233	0.306	1	21.87	0.780521	0	2	1
acetone	373.15	43.6	0.02107	58.08	329.3	47.02	0.2779	0.233	0.306	1	21.87	0.780521	0	2	1
acetone	373.15	31.4	0.0137	58.08	329.3	47.02	0.2779	0.233	0.306	1	21.87	0.780521	0	2	1
acetone	323.15	99.6	0.03371	58.08	329.3	47.02	0.2779	0.233	0.306	1	21.87	0.780521	0	2	1
acetone	323.15	67.1	0.02258	58.08	329.3	47.02	0.2779	0.233	0.306	1	21.87	0.780521	0	2	1
acetone	323.15	67	0.02286	58.08	329.3	47.02	0.2779	0.233	0.306	1	21.87	0.780521	0	2	1
acetone	323.15	42.4	0.01435	58.08	329.3	47.02	0.2779	0.233	0.306	1	21.87	0.780521	0	2	1
acetone	323.15	40.5	0.01378	58.08	329.3	47.02	0.2779	0.233	0.306	1	21.87	0.780521	0	2	1
acetone	323.15	17.62	0.00589	58.08	329.3	47.02	0.2779	0.233	0.306	1	21.87	0.780521	0	2	1
acetone	298.15	94.8	0.02657	58.08	329.3	47.02	0.2779	0.233	0.306	1	21.87	0.780521	0	2	1
acetone	298.15	88.1	0.02455	58.08	329.3	47.02	0.2779	0.233	0.306	1	21.87	0.780521	0	2	1
acetone	298.15	73.4	0.02091	58.08	329.3	47.02	0.2779	0.233	0.306	1	21.87	0.780521	0	2	1
acetone	298.15	54.1	0.0152	58.08	329.3	47.02	0.2779	0.233	0.306	1	21.87	0.780521	0	2	1
acetone	298.15	52.8	0.01494	58.08	329.3	47.02	0.2779	0.233	0.306	1	21.87	0.780521	0	2	1
acetone	298.15	47.3	0.01321	58.08	329.3	47.02	0.2779	0.233	0.306	1	21.87	0.780521	0	2	1
acetone	298.15	32.3	0.0091	58.08	329.3	47.02	0.2779	0.233	0.306	1	21.87	0.780521	0	2	1
acetone	298.15	27.5	0.00787	58.08	329.3	47.02	0.2779	0.233	0.306	1	21.87	0.780521	0	2	1
acetone	298.15	14.73	0.00418	58.08	329.3	47.02	0.2779	0.233	0.306	1	21.87	0.780521	0	2	1
acetonitrile	373.15	103.9	0.02939	41.053	354.8	48.7	0.28	0.158	0.338	1	27.39	0.868565	0	0	0
acetonitrile	373.15	84.8	0.02391	41.053	354.8	48.7	0.28	0.158	0.338	1	27.39	0.868565	0	0	0
acetonitrile	373.15	41.2	0.01166	41.053	354.8	48.7	0.28	0.158	0.338	1	27.39	0.868565	0	0	0
acetonitrile	373.15	21.1	0.00582	41.053	354.8	48.7	0.28	0.158	0.338	1	27.39	0.868565	0	0	0
acetonitrile	373.15	9.46	0.00233	41.053	354.8	48.7	0.28	0.158	0.338	1	27.39	0.868565	0	0	0
acetonitrile	323.15	100.5	0.02049	41.053	354.8	48.7	0.28	0.158	0.338	1	27.39	0.868565	0	0	0
acetonitrile	323.15	86.8	0.01829	41.053	354.8	48.7	0.28	0.158	0.338	1	27.39	0.868565	0	0	0
acetonitrile	323.15	76.1	0.01558	41.053	354.8	48.7	0.28	0.158	0.338	1	27.39	0.868565	0	0	0
acetonitrile	323.15	57.8	0.01225	41.053	354.8	48.7	0.28	0.158	0.338	1	27.39	0.868565	0	0	0
acetonitrile	323.15	38.3	0.00794	41.053	354.8	48.7	0.28	0.158	0.338	1	27.39	0.868565	0	0	0
acetonitrile	323.15	29.2	0.0062	41.053	354.8	48.7	0.28	0.158	0.338	1	27.39	0.868565	0	0	0
acetonitrile	323.15	15.54	0.00324	41.053	354.8	48.7	0.28	0.158	0.338	1	27.39	0.868565	0	0	0
acetonitrile	298.15	102.5	0.01736	41.053	354.8	48.7	0.28	0.158	0.338	1	27.39	0.868565	0	0	0
acetonitrile	298.15	97.2	0.0169	41.053	354.8	48.7	0.28	0.158	0.338	1	27.39	0.868565	0	0	0
acetonitrile	298.15	67.7	0.01161	41.053	354.8	48.7	0.28	0.158	0.338	1	27.39	0.868565	0	0	0
acetonitrile	298.15	60.8	0.01067	41.053	354.8	48.7	0.28	0.158	0.338	1	27.39	0.868565	0	0	0
acetonitrile	298.15	36.6	0.00647	41.053	354.8	48.7	0.28	0.158	0.338	1	27.39	0.868565	0	0	0
acetonitrile	298.15	35.9	0.00619	41.053	354.8	48.7	0.28	0.158	0.338	1	27.39	0.868565	0	0	0
acetonitrile	298.15	15.94	0.0028	41.053	354.8	48.7	0.28	0.158	0.338	1	27.39	0.868565	0	0	0
allyl alcohol	473	103.9	0.0488	58.08	370	66.59	0.3181	0.268	0.256	1	25.03	0.80823	0	0	38
allyl alcohol	473	87	0.0388	58.08	370	66.59	0.3181	0.268	0.256	1	25.03	0.80823	0	0	38
allyl alcohol	473	73.4	0.0315	58.08	370	66.59	0.3181	0.268	0.256	1	25.03	0.80823	0	0	38
allyl alcohol	473	63.1	0.0259	58.08	370	66.59	0.3181	0.268	0.256	1	25.03	0.80823	0	0	38
allyl alcohol	473	44	0.0144	58.08	370	66.59	0.3181	0.268	0.256	1	25.03	0.80823	0	0	38
allyl alcohol	443	152.5	0.0616	58.08	370	66.59	0.3181	0.268	0.256	1	25.03	0.80823	0	0	38
allyl alcohol	443	133.4	0.053	58.08	370	66.59	0.3181	0.268	0.256	1	25.03	0.80823	0	0	14
allyl alcohol	443	123.2	0.0487	58.08	370	66.59	0.3181	0.268	0.256	1	25.03	0.80823	0	0	14
allyl alcohol	443	105.8	0.0415	58.08	370	66.59	0.3181	0.268	0.256	1	25.03	0.80823	0	0	14
allyl alcohol	443	80.1	0.0302	58.08	370	66.59	0.3181	0.268	0.256	1	25.03	0.80823	0	0	14
allyl alcohol	443	62.2	0.0223	58.08	370	66.59	0.3181	0.268	0.256	1	25.03	0.80823	0	0	14
allyl alcohol	402	150.1	0.0472	58.08	370	66.59	0.3181	0.268	0.256	1	25.03	0.80823	0	0	14
allyl alcohol	401.9	135.6	0.0423	58.08	370	66.59	0.3181	0.268	0.256	1	25.03	0.80823	0	0	14
allyl alcohol	401.9	116	0.0359	58.08	370	66.59	0.3181	0.268	0.256	1	25.03	0.80823	0	0	14
allyl alcohol	401.9	105.7	0.0322	58.08	370	66.59	0.3181	0.268	0.256	1	25.03	0.80823	0	0	14
allyl alcohol	401.9	85.5	0.0266	58.08	370	66.59	0.3181	0.268	0.256	1	25.03	0.80823	0	0	14
allyl alcohol	341.5	146.2	0.0315	58.08	370	66.59	0.3181	0.268	0.256	1	25.03	0.80823	0	0	14
allyl alcohol	341.5	126.7	0.0273	58.08	370	66.59	0.3181	0.268	0.256	1	25.03	0.80823	0	0	14
allyl alcohol	341.5	109	0.023	58.08	370	66.59	0.3181	0.268	0.256	1	25.03	0.80823	0	0	14
allyl alcohol	341.5	80.2	0.0172	58.08	370	66.59	0.3181	0.268	0.256	1	25.03	0.80823	0	0	14
allyl alcohol	341.5	69.3	0.0143	58.08	370	66.59	0.3181	0.268	0.256	1	25.03	0.80823	0	0	14
alpha-methylstyrene	373.15	68.95	0.0304	118.178	438	35.52	0.2975	0.258	0.357	0	10.8	0	0	0	9
alpha-methylstyrene	373.15	55.16	0.0247	118.178	438	35.52	0.2975	0.258	0.357	0	10.8	0	0	0	9
alpha-methylstyrene	373.15	34.47	0.0155	118.178	438	35.52	0.2975	0.258	0.357	0	10.8	0	0	0	9
alpha-methylstyrene	373.15	20.68	0.00945	118.178	438	35.52	0.2975	0.258	0.357	0	10.8	0	0	0	9
alpha-methylstyrene	373.15	6.89	0.00336	118.178	438	35.52	0.2975	0.258	0.357	0	10.8	0	0	0	9
alpha-methylstyrene	333.15	68.95	0.0254	118.178	438	35.52	0.2975	0.258	0.357	0	10.8	0	0	0	9
alpha-methylstyrene	333.15	55.16	0.0203	118.178	438	35.52	0.2975	0.258	0.357	0	10.8	0	0	0	9
alpha-methylstyrene	333.15	34.47	0.0129	118.178	438	35.52	0.2975	0.258	0.357	0	10.8	0	0	0	9
alpha-methylstyrene	333.15	20.68	0.00788	118.178	438	35.52	0.2975	0.258	0.357	0	10.8	0	0	0	9
alpha-methylstyrene	333.15	6.89	0.00284	118.178	438	35.52	0.2975	0.258	0.357	0	10.8	0	0	0	9
alpha-methylstyrene	323	130	0.0407	118.178	438	35.52	0.2975	0.258	0.357	0	10.8	0	0	0	9
alpha-methylstyrene	323	90.1	0.0289	118.178	438	35.52	0.2975	0.258	0.357	0	10.8	0	0	0	9
alpha-methylstyrene	323	70.1	0.022	118.178	438	35.52	0.2975	0.258	0.357	0	10.8	0	0	0	9
alpha-methylstyrene	323	50.1	0.0157	118.178	438	35.52	0.2975	0.258	0.357	0	10.8	0	0	0	9
alpha-methylstyrene	323	30	0.0098	118.178	438	35.52	0.2975	0.258	0.357	0	10.8	0	0	0	9
alpha-methylstyrene	323	20	0.0068	118.178	438	35.52	0.2975	0.258	0.357	0	10.8	0	0	0	9
alpha-methylstyrene	323	10	0.0033	118.178	438	35.52	0.2975	0.258	0.357	0	10.8	0	0	0	9
alpha-methylstyrene	308	130	0.0371	118.178	438	35.52	0.2975	0.258	0.357	0	10.8	0	0	0	9
alpha-methylstyrene	308	90.3	0.0271	118.178	438	35.52	0.2975	0.258	0.357	0	10.8	0	0	0	9
alpha-methylstyrene	308	70	0.0209	118.178	438	35.52	0.2975	0.258	0.357	0	10.8	0	0	0	9
alpha-methylstyrene	308	30.2	0.0089	118.178	438	35.52	0.2975	0.258	0.357	0	10.8	0	0	0	9
alpha-methylstyrene	303.15	68.95	0.0212	118.178	438	35.52	0.2975	0.258	0.357	0	10.8	0	0	0	9
alpha-methylstyrene	303.15	55.16	0.0171	118.178	438	35.52	0.2975	0.258	0.357	0	10.8	0	0	0	9
alpha-methylstyrene	303.15	34.47	0.0108	118.178	438	35.52	0.2975	0.258	0.357	0	10.8	0	0	0	9
alpha-methylstyrene	303.15	20.68	0.00655	118.178	438	35.52	0.2975	0.258	0.357	0	10.8	0	0	0	9
alpha-methylstyrene	303.15	6.89	0.00239	118.178	438	35.52	0.2975	0.258	0.357	0	10.8	0	0	0	9
benzene	423.2	107.3	0.0585	78.114	353.22	48.95	0.3051	0.268	0.21	0	7.2	0	0	0	6
benzene	423.2	104.4	0.0569	78.114	353.22	48.95	0.3051	0.268	0.21	0	7.2	0	0	0	6
benzene	423.2	74	0.04	78.114	353.22	48.95	0.3051	0.268	0.21	0	7.2	0	0	0	6
benzene	423.2	70.7	0.0381	78.114	353.22	48.95	0.3051	0.268	0.21	0	7.2	0	0	0	6
benzene	423.2	48.5	0.0254	78.114	353.22	48.95	0.3051	0.268	0.21	0	7.2	0	0	0	6
benzene	423.2	40.5	0.0207	78.114	353.22	48.95	0.3051	0.268	0.21	0	7.2	0	0	0	6
benzene	373.2	127.1	0.0523	78.114	353.22	48.95	0.3051	0.268	0.21	0	7.2	0	0	0	6
benzene	373.2	115.1	0.0477	78.114	353.22	48.95	0.3051	0.268	0.21	0	7.2	0	0	0	6
benzene	373.2	75.7	0.0316	78.114	353.22	48.95	0.3051	0.268	0.21	0	7.2	0	0	0	6
benzene	373.2	56	0.0233	78.114	353.22	48.95	0.3051	0.268	0.21	0	7.2	0	0	0	6
benzene	373.2	41.5	0.0173	78.114	353.22	48.95	0.3051	0.268	0.21	0	7.2	0	0	0	6
benzene	373.2	25.5	0.0103	78.114	353.22	48.95	0.3051	0.268	0.21	0	7.2	0	0	0	6
benzene	323.2	157.3	0.0455	78.114	353.22	48.95	0.3051	0.268	0.21	0	7.2	0	0	0	6
benzene	323.2	119.7	0.0351	78.114	353.22	48.95	0.3051	0.268	0.21	0	7.2	0	0	0	6
benzene	323.2	98	0.029	78.114	353.22	48.95	0.3051	0.268	0.21	0	7.2	0	0	0	6
benzene	323.2	82.2	0.0245	78.114	353.22	48.95	0.3051	0.268	0.21	0	7.2	0	0	0	6
benzene	323.2	45.6	0.0138	78.114	353.22	48.95	0.3051	0.268	0.21	0	7.2	0	0	0	6
benzene	323.2	40.7	0.0123	78.114	353.22	48.95	0.3051	0.268	0.21	0	7.2	0	0	0	6
benzene	308.15	1.01	0.0002805	78.114	353.22	48.95	0.3051	0.268	0.21	0	7.2	0	0	0	6
benzene	303.15	46.01	0.01268	78.114	353.22	48.95	0.3051	0.268	0.21	0	7.2	0	0	0	6
benzene	303.15	39.04	0.010775	78.114	353.22	48.95	0.3051	0.268	0.21	0	7.2	0	0	0	6
benzene	303.15	35.44	0.009835	78.114	353.22	48.95	0.3051	0.268	0.21	0	7.2	0	0	0	6
benzene	303.15	27.44	0.007616	78.114	353.22	48.95	0.3051	0.268	0.21	0	7.2	0	0	0	6
benzene	303.15	22.07	0.006012	78.114	353.22	48.95	0.3051	0.268	0.21	0	7.2	0	0	0	6
benzene	303.15	20.22	0.005606	78.114	353.22	48.95	0.3051	0.268	0.21	0	7.2	0	0	0	6
benzene	303.15	16.84	0.004687	78.114	353.22	48.95	0.3051	0.268	0.21	0	7.2	0	0	0	6
benzene	303.15	11.43	0.003951	78.114	353.22	48.95	0.3051	0.268	0.21	0	7.2	0	0	0	6
benzene	303.15	9.89	0.002673	78.114	353.22	48.95	0.3051	0.268	0.21	0	7.2	0	0	0	6
benzene	298.15	1.01	0.0002578	78.114	353.22	48.95	0.3051	0.268	0.21	0	7.2	0	0	0	6
benzene	295	173.3	0.0424	78.114	353.22	48.95	0.3051	0.268	0.21	0	7.2	0	0	0	6
benzene	295	138.8	0.0341	78.114	353.22	48.95	0.3051	0.268	0.21	0	7.2	0	0	0	6
benzene	295	104.4	0.0269	78.114	353.22	48.95	0.3051	0.268	0.21	0	7.2	0	0	0	6
benzene	295	69.9	0.0172	78.114	353.22	48.95	0.3051	0.268	0.21	0	7.2	0	0	0	6
benzene	283.15	1.01	0.0002253	78.114	353.22	48.95	0.3051	0.268	0.21	0	7.2	0	0	0	6
cumene	373.15	68.95	0.0397	120.194	425.56	32.09	0.2769	0.265	0.327	0	10.8	0	0	0	1
cumene	373.15	55.16	0.0327	120.194	425.56	32.09	0.2769	0.265	0.327	0	10.8	0	0	0	1
cumene	373.15	34.47	0.0205	120.194	425.56	32.09	0.2769	0.265	0.327	0	10.8	0	0	0	1
cumene	373.15	20.68	0.0125	120.194	425.56	32.09	0.2769	0.265	0.327	0	10.8	0	0	0	1
cumene	373.15	6.89	0.00415	120.194	425.56	32.09	0.2769	0.265	0.327	0	10.8	0	0	0	1
cumene	333.15	68.95	0.0324	120.194	425.56	32.09	0.2769	0.265	0.327	0	10.8	0	0	0	1
cumene	333.15	55.16	0.026	120.194	425.56	32.09	0.2769	0.265	0.327	0	10.8	0	0	0	1
cumene	333.15	34.47	0.0167	120.194	425.56	32.09	0.2769	0.265	0.327	0	10.8	0	0	0	1
cumene	333.15	20.68	0.0102	120.194	425.56	32.09	0.2769	0.265	0.327	0	10.8	0	0	0	1
cumene	333.15	6.89	0.00344	120.194	425.56	32.09	0.2769	0.265	0.327	0	10.8	0	0	0	1
cumene	323	117	0.0486	120.194	425.56	32.09	0.2769	0.265	0.327	0	10.8	0	0	0	1
cumene	323	90.2	0.0367	120.194	425.56	32.09	0.2769	0.265	0.327	0	10.8	0	0	0	1
cumene	323	49.7	0.0217	120.194	425.56	32.09	0.2769	0.265	0.327	0	10.8	0	0	0	1
cumene	323	30.1	0.0132	120.194	425.56	32.09	0.2769	0.265	0.327	0	10.8	0	0	0	1
cumene	323	10.2	0.004	120.194	425.56	32.09	0.2769	0.265	0.327	0	10.8	0	0	0	1
cyclohexane	523.15	107.58	0.12996	84.161	353.9	40.8	0.2733	0.273	0.208	0	7.2	0	0	0	6
cyclohexane	523.15	88.45	0.10019	84.161	353.9	40.8	0.2733	0.273	0.208	0	7.2	0	0	0	6
cyclohexane	523.15	74.74	0.07817	84.161	353.9	40.8	0.2733	0.273	0.208	0	7.2	0	0	0	6
cyclohexane	523.15	53.49	0.04349	84.161	353.9	40.8	0.2733	0.273	0.208	0	7.2	0	0	0	6
cyclohexane	523.15	39.33	0.01982	84.161	353.9	40.8	0.2733	0.273	0.208	0	7.2	0	0	0	6
cyclohexane	523.15	39.02	0.01931	84.161	353.9	40.8	0.2733	0.273	0.208	0	7.2	0	0	0	6
cyclohexane	513.15	113.71	0.12996	84.161	353.9	40.8	0.2733	0.273	0.208	0	7.2	0	0	0	6
cyclohexane	513.15	92.04	0.10019	84.161	353.9	40.8	0.2733	0.273	0.208	0	7.2	0	0	0	6
cyclohexane	513.15	76.61	0.07817	84.161	353.9	40.8	0.2733	0.273	0.208	0	7.2	0	0	0	6
cyclohexane	513.15	52.85	0.04349	84.161	353.9	40.8	0.2733	0.273	0.208	0	7.2	0	0	0	6
cyclohexane	513.15	37.1	0.01982	84.161	353.9	40.8	0.2733	0.273	0.208	0	7.2	0	0	0	6
cyclohexane	503.15	119.44	0.12996	84.161	353.9	40.8	0.2733	0.273	0.208	0	7.2	0	0	0	6
cyclohexane	503.15	95.55	0.10019	84.161	353.9	40.8	0.2733	0.273	0.208	0	7.2	0	0	0	6
cyclohexane	503.15	78.48	0.07817	84.161	353.9	40.8	0.2733	0.273	0.208	0	7.2	0	0	0	6
cyclohexane	503.15	52.37	0.04349	84.161	353.9	40.8	0.2733	0.273	0.208	0	7.2	0	0	0	6
cyclohexane	503.15	35.14	0.01982	84.161	353.9	40.8	0.2733	0.273	0.208	0	7.2	0	0	0	6
cyclohexane	493.15	125.23	0.12996	84.161	353.9	40.8	0.2733	0.273	0.208	0	7.2	0	0	0	6
cyclohexane	493.15	99.14	0.10019	84.161	353.9	40.8	0.2733	0.273	0.208	0	7.2	0	0	0	6
cyclohexane	493.15	80.52	0.07817	84.161	353.9	40.8	0.2733	0.273	0.208	0	7.2	0	0	0	6
cyclohexane	493.15	52.2	0.04349	84.161	353.9	40.8	0.2733	0.273	0.208	0	7.2	0	0	0	6
cyclohexane	493.15	33.49	0.01982	84.161	353.9	40.8	0.2733	0.273	0.208	0	7.2	0	0	0	6
cyclohexane	483.15	131.36	0.12996	84.161	353.9	40.8	0.2733	0.273	0.208	0	7.2	0	0	0	6
cyclohexane	483.15	102.96	0.10019	84.161	353.9	40.8	0.2733	0.273	0.208	0	7.2	0	0	0	6
cyclohexane	483.15	82.89	0.07817	84.161	353.9	40.8	0.2733	0.273	0.208	0	7.2	0	0	0	6
cyclohexane	483.15	52.22	0.04349	84.161	353.9	40.8	0.2733	0.273	0.208	0	7.2	0	0	0	6
cyclohexane	483.15	32.09	0.01982	84.161	353.9	40.8	0.2733	0.273	0.208	0	7.2	0	0	0	6
cyclohexane	483.15	31.66	0.01931	84.161	353.9	40.8	0.2733	0.273	0.208	0	7.2	0	0	0	6
cyclohexane	473.15	137.67	0.12996	84.161	353.9	40.8	0.2733	0.273	0.208	0	7.2	0	0	0	6
cyclohexane	473.15	106.93	0.10019	84.161	353.9	40.8	0.2733	0.273	0.208	0	7.2	0	0	0	6
cyclohexane	473.15	85.37	0.07817	84.161	353.9	40.8	0.2733	0.273	0.208	0	7.2	0	0	0	6
cyclohexane	473.15	48.38	0.04349	84.161	353.9	40.8	0.2733	0.273	0.208	0	7.2	0	0	0	6
cyclohexane	473.15	30.96	0.01982	84.161	353.9	40.8	0.2733	0.273	0.208	0	7.2	0	0	0	6
cyclohexane	463.15	144.28	0.12996	84.161	353.9	40.8	0.2733	0.273	0.208	0	7.2	0	0	0	6
cyclohexane	463.15	111.52	0.10019	84.161	353.9	40.8	0.2733	0.273	0.208	0	7.2	0	0	0	6
cyclohexane	463.15	88.3	0.07817	84.161	353.9	40.8	0.2733	0.273	0.208	0	7.2	0	0	0	6
cyclohexane	463.15	53.13	0.04349	84.161	353.9	40.8	0.2733	0.273	0.208	0	7.2	0	0	0	6
cyclohexane	463.15	30.1	0.01982	84.161	353.9	40.8	0.2733	0.273	0.208	0	7.2	0	0	0	6
cyclohexane	453.15	151.51	0.12996	84.161	353.9	40.8	0.2733	0.273	0.208	0	7.2	0	0	0	6
cyclohexane	453.15	116.25	0.10019	84.161	353.9	40.8	0.2733	0.273	0.208	0	7.2	0	0	0	6
cyclohexane	453.15	91.47	0.07817	84.161	353.9	40.8	0.2733	0.273	0.208	0	7.2	0	0	0	6
cyclohexane	453.15	54.01	0.04349	84.161	353.9	40.8	0.2733	0.273	0.208	0	7.2	0	0	0	6
cyclohexane	453.15	29.51	0.01982	84.161	353.9	40.8	0.2733	0.273	0.208	0	7.2	0	0	0	6
cyclohexane	443.15	159.14	0.12996	84.161	353.9	40.8	0.2733	0.273	0.208	0	7.2	0	0	0	6
cyclohexane	443.15	121.64	0.10019	84.161	353.9	40.8	0.2733	0.273	0.208	0	7.2	0	0	0	6
cyclohexane	443.15	95.17	0.07817	84.161	353.9	40.8	0.2733	0.273	0.208	0	7.2	0	0	0	6
cyclohexane	443.15	55.21	0.04349	84.161	353.9	40.8	0.2733	0.273	0.208	0	7.2	0	0	0	6
cyclohexane	443.15	29.19	0.01982	84.161	353.9	40.8	0.2733	0.273	0.208	0	7.2	0	0	0	6
cyclohexane	433.15	127.36	0.10019	84.161	353.9	40.8	0.2733	0.273	0.208	0	7.2	0	0	0	6
cyclohexane	433.15	99.17	0.07817	84.161	353.9	40.8	0.2733	0.273	0.208	0	7.2	0	0	0	6
cyclohexane	433.15	56.71	0.04349	84.161	353.9	40.8	0.2733	0.273	0.208	0	7.2	0	0	0	6
cyclohexane	433.15	29.05	0.01982	84.161	353.9	40.8	0.2733	0.273	0.208	0	7.2	0	0	0	6
cyclohexane	423.15	133.6	0.10019	84.161	353.9	40.8	0.2733	0.273	0.208	0	7.2	0	0	0	6
cyclohexane	423.15	103.61	0.07817	84.161	353.9	40.8	0.2733	0.273	0.208	0	7.2	0	0	0	6
cyclohexane	423.15	58.51	0.04349	84.161	353.9	40.8	0.2733	0.273	0.208	0	7.2	0	0	0	6
cyclohexane	423.15	29.19	0.01982	84.161	353.9	40.8	0.2733	0.273	0.208	0	7.2	0	0	0	6
cyclohexane	413.15	140.45	0.10019	84.161	353.9	40.8	0.2733	0.273	0.208	0	7.2	0	0	0	6
cyclohexane	413.15	108.54	0.07817	84.161	353.9	40.8	0.2733	0.273	0.208	0	7.2	0	0	0	6
cyclohexane	413.15	60.66	0.04349	84.161	353.9	40.8	0.2733	0.273	0.208	0	7.2	0	0	0	6
cyclohexane	413.15	29.53	0.01982	84.161	353.9	40.8	0.2733	0.273	0.208	0	7.2	0	0	0	6
cyclohexane	403.15	147.45	0.10019	84.161	353.9	40.8	0.2733	0.273	0.208	0	7.2	0	0	0	6
cyclohexane	403.15	113.62	0.07817	84.161	353.9	40.8	0.2733	0.273	0.208	0	7.2	0	0	0	6
cyclohexane	403.15	62.8	0.04349	84.161	353.9	40.8	0.2733	0.273	0.208	0	7.2	0	0	0	6
cyclohexane	403.15	30.06	0.01982	84.161	353.9	40.8	0.2733	0.273	0.208	0	7.2	0	0	0	6
cyclohexane	393.15	155.89	0.10019	84.161	353.9	40.8	0.2733	0.273	0.208	0	7.2	0	0	0	6
cyclohexane	393.15	119.86	0.07817	84.161	353.9	40.8	0.2733	0.273	0.208	0	7.2	0	0	0	6
cyclohexane	393.15	65.89	0.04349	84.161	353.9	40.8	0.2733	0.273	0.208	0	7.2	0	0	0	6
cyclohexane	393.15	30.93	0.01982	84.161	353.9	40.8	0.2733	0.273	0.208	0	7.2	0	0	0	6
cyclohexane	383.15	164.81	0.10019	84.161	353.9	40.8	0.2733	0.273	0.208	0	7.2	0	0	0	6
cyclohexane	383.15	126.32	0.07817	84.161	353.9	40.8	0.2733	0.273	0.208	0	7.2	0	0	0	6
cyclohexane	383.15	71.06	0.04349	84.161	353.9	40.8	0.2733	0.273	0.208	0	7.2	0	0	0	6
cyclohexane	383.15	31.97	0.01982	84.161	353.9	40.8	0.2733	0.273	0.208	0	7.2	0	0	0	6
cyclohexane	373.15	133.49	0.07817	84.161	353.9	40.8	0.2733	0.273	0.208	0	7.2	0	0	0	6
cyclohexane	373.15	72.61	0.04349	84.161	353.9	40.8	0.2733	0.273	0.208	0	7.2	0	0	0	6
cyclohexane	373.15	68.95	0.03686	84.161	353.9	40.8	0.2733	0.273	0.208	0	7.2	0	0	0	6
cyclohexane	373.15	55.16	0.0299	84.161	353.9	40.8	0.2733	0.273	0.208	0	7.2	0	0	0	6
cyclohexane	373.15	34.47	0.0186	84.161	353.9	40.8	0.2733	0.273	0.208	0	7.2	0	0	0	6
cyclohexane	373.15	33.25	0.01982	84.161	353.9	40.8	0.2733	0.273	0.208	0	7.2	0	0	0	6
cyclohexane	373.15	20.68	0.0112	84.161	353.9	40.8	0.2733	0.273	0.208	0	7.2	0	0	0	6
cyclohexane	373.15	6.89	0.0032	84.161	353.9	40.8	0.2733	0.273	0.208	0	7.2	0	0	0	6
cyclohexane	373	43.9	0.02951	84.161	353.9	40.8	0.2733	0.273	0.208	0	7.2	0	0	0	6
cyclohexane	373	26.9	0.01785	84.161	353.9	40.8	0.2733	0.273	0.208	0	7.2	0	0	0	6
cyclohexane	373	5	0.00261	84.161	353.9	40.8	0.2733	0.273	0.208	0	7.2	0	0	0	6
cyclohexane	363.15	141.47	0.07817	84.161	353.9	40.8	0.2733	0.273	0.208	0	7.2	0	0	0	6
cyclohexane	363.15	76.6	0.04349	84.161	353.9	40.8	0.2733	0.273	0.208	0	7.2	0	0	0	6
cyclohexane	363.15	34.78	0.01982	84.161	353.9	40.8	0.2733	0.273	0.208	0	7.2	0	0	0	6
cyclohexane	353.15	150.28	0.07817	84.161	353.9	40.8	0.2733	0.273	0.208	0	7.2	0	0	0	6
cyclohexane	353.15	81	0.04349	84.161	353.9	40.8	0.2733	0.273	0.208	0	7.2	0	0	0	6
cyclohexane	353.15	36.52	0.01982	84.161	353.9	40.8	0.2733	0.273	0.208	0	7.2	0	0	0	6
cyclohexane	343.15	160.12	0.07817	84.161	353.9	40.8	0.2733	0.273	0.208	0	7.2	0	0	0	6
cyclohexane	343.15	85.96	0.04349	84.161	353.9	40.8	0.2733	0.273	0.208	0	7.2	0	0	0	6
cyclohexane	343.15	38.63	0.01982	84.161	353.9	40.8	0.2733	0.273	0.208	0	7.2	0	0	0	6
cyclohexane	333.15	91.6	0.04349	84.161	353.9	40.8	0.2733	0.273	0.208	0	7.2	0	0	0	6
cyclohexane	333.15	68.95	0.0293	84.161	353.9	40.8	0.2733	0.273	0.208	0	7.2	0	0	0	6
cyclohexane	333.15	55.16	0.0258	84.161	353.9	40.8	0.2733	0.273	0.208	0	7.2	0	0	0	6
cyclohexane	333.15	40.86	0.01982	84.161	353.9	40.8	0.2733	0.273	0.208	0	7.2	0	0	0	6
cyclohexane	333.15	34.47	0.0159	84.161	353.9	40.8	0.2733	0.273	0.208	0	7.2	0	0	0	6
cyclohexane	333.15	20.68	0.0094	84.161	353.9	40.8	0.2733	0.273	0.208	0	7.2	0	0	0	6
cyclohexane	333.15	6.89	0.00311	84.161	353.9	40.8	0.2733	0.273	0.208	0	7.2	0	0	0	6
cyclohexane	332	46	0.02345	84.161	353.9	40.8	0.2733	0.273	0.208	0	7.2	0	0	0	6
cyclohexane	332	24	0.01247	84.161	353.9	40.8	0.2733	0.273	0.208	0	7.2	0	0	0	6
cyclohexane	332	5.67	0.0029	84.161	353.9	40.8	0.2733	0.273	0.208	0	7.2	0	0	0	6
cyclohexane	323.15	98.52	0.04349	84.161	353.9	40.8	0.2733	0.273	0.208	0	7.2	0	0	0	6
cyclohexane	323.15	43.62	0.01982	84.161	353.9	40.8	0.2733	0.273	0.208	0	7.2	0	0	0	6
cyclohexane	313.15	105.01	0.04349	84.161	353.9	40.8	0.2733	0.273	0.208	0	7.2	0	0	0	6
cyclohexane	313.15	46.55	0.01982	84.161	353.9	40.8	0.2733	0.273	0.208	0	7.2	0	0	0	6
cyclohexane	308.15	108.87	0.04349	84.161	353.9	40.8	0.2733	0.273	0.208	0	7.2	0	0	0	6
cyclohexane	308.15	48.2	0.01982	84.161	353.9	40.8	0.2733	0.273	0.208	0	7.2	0	0	0	6
cyclohexane	304	44.9	0.01887	84.161	353.9	40.8	0.2733	0.273	0.208	0	7.2	0	0	0	6
cyclohexane	304	26.8	0.01124	84.161	353.9	40.8	0.2733	0.273	0.208	0	7.2	0	0	0	6
cyclohexane	304	6.42	0.00291	84.161	353.9	40.8	0.2733	0.273	0.208	0	7.2	0	0	0	6
cyclohexane	304	1.31	0.00063	84.161	353.9	40.8	0.2733	0.273	0.208	0	7.2	0	0	0	6
cyclohexane	303.15	68.95	0.0248	84.161	353.9	40.8	0.2733	0.273	0.208	0	7.2	0	0	0	6
cyclohexane	303.15	55.16	0.0202	84.161	353.9	40.8	0.2733	0.273	0.208	0	7.2	0	0	0	6
cyclohexane	303.15	47.43	0.019661	84.161	353.9	40.8	0.2733	0.273	0.208	0	7.2	0	0	0	6
cyclohexane	303.15	42.07	0.017368	84.161	353.9	40.8	0.2733	0.273	0.208	0	7.2	0	0	0	6
cyclohexane	303.15	35.47	0.014731	84.161	353.9	40.8	0.2733	0.273	0.208	0	7.2	0	0	0	6
cyclohexane	303.15	34.47	0.0127	84.161	353.9	40.8	0.2733	0.273	0.208	0	7.2	0	0	0	6
cyclohexane	303.15	30.05	0.012547	84.161	353.9	40.8	0.2733	0.273	0.208	0	7.2	0	0	0	6
cyclohexane	303.15	26.87	0.011268	84.161	353.9	40.8	0.2733	0.273	0.208	0	7.2	0	0	0	6
cyclohexane	303.15	21.43	0.008771	84.161	353.9	40.8	0.2733	0.273	0.208	0	7.2	0	0	0	6
cyclohexane	303.15	20.9	0.008597	84.161	353.9	40.8	0.2733	0.273	0.208	0	7.2	0	0	0	6
cyclohexane	303.15	20.68	0.00769	84.161	353.9	40.8	0.2733	0.273	0.208	0	7.2	0	0	0	6
cyclohexane	303.15	17.16	0.00713	84.161	353.9	40.8	0.2733	0.273	0.208	0	7.2	0	0	0	6
cyclohexane	303.15	14.68	0.005955	84.161	353.9	40.8	0.2733	0.273	0.208	0	7.2	0	0	0	6
cyclohexane	303.15	12.02	0.004833	84.161	353.9	40.8	0.2733	0.273	0.208	0	7.2	0	0	0	6
cyclohexane	303.15	8.87	0.003456	84.161	353.9	40.8	0.2733	0.273	0.208	0	7.2	0	0	0	6
cyclohexane	303.15	6.89	0.00273	84.161	353.9	40.8	0.2733	0.273	0.208	0	7.2	0	0	0	6
cyclohexane	295	173.3	0.0683	84.161	353.9	40.8	0.2733	0.273	0.208	0	7.2	0	0	0	6
cyclohexane	295	138.8	0.0556	84.161	353.9	40.8	0.2733	0.273	0.208	0	7.2	0	0	0	6
cyclohexane	295	104.4	0.0417	84.161	353.9	40.8	0.2733	0.273	0.208	0	7.2	0	0	0	6
cyclohexane	295	69.9	0.0287	84.161	353.9	40.8	0.2733	0.273	0.208	0	7.2	0	0	0	6
cyclohexanone	373.15	68.95	0.0243	98.145	428	46	0.3264	0.25	0.306	1	25.47	0.6702	0	2	6
cyclohexanone	373.15	55.16	0.02	98.145	428	46	0.3264	0.25	0.306	1	25.47	0.6702	0	2	6
cyclohexanone	373.15	34.47	0.0125	98.145	428	46	0.3264	0.25	0.306	1	25.47	0.6702	0	2	6
cyclohexanone	373.15	20.68	0.00748	98.145	428	46	0.3264	0.25	0.306	1	25.47	0.6702	0	2	6
cyclohexanone	373.15	6.89	0.00263	98.145	428	46	0.3264	0.25	0.306	1	25.47	0.6702	0	2	6
cyclohexanone	333.15	68.95	0.0185	98.145	428	46	0.3264	0.25	0.306	1	25.47	0.6702	0	2	6
cyclohexanone	333.15	55.16	0.0157	98.145	428	46	0.3264	0.25	0.306	1	25.47	0.6702	0	2	6
cyclohexanone	333.15	34.47	0.0101	98.145	428	46	0.3264	0.25	0.306	1	25.47	0.6702	0	2	6
cyclohexanone	333.15	20.68	0.00615	98.145	428	46	0.3264	0.25	0.306	1	25.47	0.6702	0	2	6
cyclohexanone	333.15	6.89	0.00203	98.145	428	46	0.3264	0.25	0.306	1	25.47	0.6702	0	2	6
cyclohexanone	303.15	68.95	0.0151	98.145	428	46	0.3264	0.25	0.306	1	25.47	0.6702	0	2	6
cyclohexanone	303.15	55.16	0.0124	98.145	428	46	0.3264	0.25	0.306	1	25.47	0.6702	0	2	6
cyclohexanone	303.15	34.47	0.00787	98.145	428	46	0.3264	0.25	0.306	1	25.47	0.6702	0	2	6
cyclohexanone	303.15	20.68	0.00472	98.145	428	46	0.3264	0.25	0.306	1	25.47	0.6702	0	2	6
cyclohexanone	303.15	6.89	0.00158	98.145	428	46	0.3264	0.25	0.306	1	25.47	0.6702	0	2	6
cyclohexene	373.15	68.95	0.0349	82.145	356.12	42.37	0.2771	0.27	0.271	0	7.2	0	0	0	4
cyclohexene	373.15	55.16	0.028	82.145	356.12	42.37	0.2771	0.27	0.271	0	7.2	0	0	0	4
cyclohexene	373.15	34.47	0.0176	82.145	356.12	42.37	0.2771	0.27	0.271	0	7.2	0	0	0	4
cyclohexene	373.15	20.68	0.0103	82.145	356.12	42.37	0.2771	0.27	0.271	0	7.2	0	0	0	4
cyclohexene	373.15	6.89	0.00303	82.145	356.12	42.37	0.2771	0.27	0.271	0	7.2	0	0	0	4
cyclohexene	303.15	68.95	0.0225	82.145	356.12	42.37	0.2771	0.27	0.271	0	7.2	0	0	0	4
cyclohexene	303.15	55.16	0.0178	82.145	356.12	42.37	0.2771	0.27	0.271	0	7.2	0	0	0	4
cyclohexene	303.15	34.47	0.0115	82.145	356.12	42.37	0.2771	0.27	0.271	0	7.2	0	0	0	4
cyclohexene	303.15	20.68	0.00702	82.145	356.12	42.37	0.2771	0.27	0.271	0	7.2	0	0	0	4
cyclohexene	303.15	6.89	0.00238	82.145	356.12	42.37	0.2771	0.27	0.271	0	7.2	0	0	0	4
dicyclohexylmethane	473.15	98.13	0.1014	180.334	526	21.17	0.2618	0.239	0.576	0	15.6	0	0	0	17
dicyclohexylmethane	473.15	56.05	0.0593	180.334	526	21.17	0.2618	0.239	0.576	0	15.6	0	0	0	17
dicyclohexylmethane	473.15	42.41	0.0454	180.334	526	21.17	0.2618	0.239	0.576	0	15.6	0	0	0	17
dicyclohexylmethane	423.15	87.68	0.0775	180.334	526	21.17	0.2618	0.239	0.576	0	15.6	0	0	0	17
dicyclohexylmethane	423.15	49.42	0.0456	180.334	526	21.17	0.2618	0.239	0.576	0	15.6	0	0	0	17
dicyclohexylmethane	423.15	38.12	0.0339	180.334	526	21.17	0.2618	0.239	0.576	0	15.6	0	0	0	17
dicyclohexylmethane	373.15	78.23	0.0582	180.334	526	21.17	0.2618	0.239	0.576	0	15.6	0	0	0	17
dicyclohexylmethane	373.15	43.63	0.0339	180.334	526	21.17	0.2618	0.239	0.576	0	15.6	0	0	0	17
dicyclohexylmethane	373.15	34.23	0.0233	180.334	526	21.17	0.2618	0.239	0.576	0	15.6	0	0	0	17
dicyclohexylmethane	323.15	67.56	0.0374	180.334	526	21.17	0.2618	0.239	0.576	0	15.6	0	0	0	17
dicyclohexylmethane	323.15	65.48	0.0431	180.334	526	21.17	0.2618	0.239	0.576	0	15.6	0	0	0	17
dicyclohexylmethane	323.15	37.54	0.0218	180.334	526	21.17	0.2618	0.239	0.576	0	15.6	0	0	0	17
dicyclohexylmethane	323.15	29.85	0.013	180.334	526	21.17	0.2618	0.239	0.576	0	15.6	0	0	0	17
dicyclohexylmethane	323.15	15.39	0.0059	180.334	526	21.17	0.2618	0.239	0.576	0	15.6	0	0	0	17
dicyclohexylmethane	323.15	8.95	0.0028	180.334	526	21.17	0.2618	0.239	0.576	0	15.6	0	0	0	17
diethylene glycol	373.15	99.9	0.01189	106.122	519	50.15	0.3401	0.253	0.564	3	58.09	0.855397	0	0	0
diethylene glycol	373.15	80.7	0.009687	106.122	519	50.15	0.3401	0.253	0.564	3	58.09	0.855397	0	0	0
diethylene glycol	373.15	66	0.00797	106.122	519	50.15	0.3401	0.253	0.564	3	58.09	0.855397	0	0	0
diethylene glycol	373.15	24.1	0.002932	106.122	519	50.15	0.3401	0.253	0.564	3	58.09	0.855397	0	0	0
diethylene glycol	323.15	99.6	0.008741	106.122	519	50.15	0.3401	0.253	0.564	3	58.09	0.855397	0	0	0
diethylene glycol	323.15	76.3	0.006733	106.122	519	50.15	0.3401	0.253	0.564	3	58.09	0.855397	0	0	0
diethylene glycol	323.15	39.58	0.003533	106.122	519	50.15	0.3401	0.253	0.564	3	58.09	0.855397	0	0	0
diethylene glycol	323.15	27.44	0.002478	106.122	519	50.15	0.3401	0.253	0.564	3	58.09	0.855397	0	0	0
diethylene glycol	298.15	99.9	0.007358	106.122	519	50.15	0.3401	0.253	0.564	3	58.09	0.855397	0	0	0
diethylene glycol	298.15	89.1	0.006557	106.122	519	50.15	0.3401	0.253	0.564	3	58.09	0.855397	0	0	0
diethylene glycol	298.15	72.9	0.005417	106.122	519	50.15	0.3401	0.253	0.564	3	58.09	0.855397	0	0	0
diethylene glycol	298.15	45.47	0.003411	106.122	519	50.15	0.3401	0.253	0.564	3	58.09	0.855397	0	0	0
diethylene glycol	298.15	19.16	0.001452	106.122	519	50.15	0.3401	0.253	0.564	3	58.09	0.855397	0	0	0
diethylene glycol monomethyl ether	373.15	106.3	0.02991	120.148	466.75	35.45	0.3274	0.248	0.635	3	48.29	0.801201	0	0	0
diethylene glycol monomethyl ether	373.15	72.7	0.02085	120.148	466.75	35.45	0.3274	0.248	0.635	3	48.29	0.801201	0	0	0
diethylene glycol monomethyl ether	373.15	39.6	0.01153	120.148	466.75	35.45	0.3274	0.248	0.635	3	48.29	0.801201	0	0	0
diethylene glycol monomethyl ether	373.15	21.1	0.006214	120.148	466.75	35.45	0.3274	0.248	0.635	3	48.29	0.801201	0	0	0
diethylene glycol monomethyl ether	323.15	104.1	0.02107	120.148	466.75	35.45	0.3274	0.248	0.635	3	48.29	0.801201	0	0	0
diethylene glycol monomethyl ether	323.15	72.5	0.01489	120.148	466.75	35.45	0.3274	0.248	0.635	3	48.29	0.801201	0	0	0
diethylene glycol monomethyl ether	323.15	43.2	0.008947	120.148	466.75	35.45	0.3274	0.248	0.635	3	48.29	0.801201	0	0	0
diethylene glycol monomethyl ether	323.15	14.86	0.003119	120.148	466.75	35.45	0.3274	0.248	0.635	3	48.29	0.801201	0	0	0
diethylene glycol monomethyl ether	298.15	101.9	0.01691	120.148	466.75	35.45	0.3274	0.248	0.635	3	48.29	0.801201	0	0	0
diethylene glycol monomethyl ether	298.15	69.7	0.01176	120.148	466.75	35.45	0.3274	0.248	0.635	3	48.29	0.801201	0	0	0
diethylene glycol monomethyl ether	298.15	41.85	0.007176	120.148	466.75	35.45	0.3274	0.248	0.635	3	48.29	0.801201	0	0	0
diethylene glycol monomethyl ether	298.15	14.41	0.002478	120.148	466.75	35.45	0.3274	0.248	0.635	3	48.29	0.801201	0	0	0
dimethyl ether	316.15	68.4	0.068	46.069	249	53.7	0.271	0.274	0.2	1	12.83	0.719408	0	0	0
dimethyl ether	316.15	61.4	0.061	46.069	249	53.7	0.271	0.274	0.2	1	12.83	0.719408	0	0	0
dimethyl ether	316.15	54.8	0.052	46.069	249	53.7	0.271	0.274	0.2	1	12.83	0.719408	0	0	0
dimethyl ether	316.15	48.4	0.042	46.069	249	53.7	0.271	0.274	0.2	1	12.83	0.719408	0	0	0
dimethyl ether	316.15	41.9	0.037	46.069	249	53.7	0.271	0.274	0.2	1	12.83	0.719408	0	0	0
dimethyl ether	316.15	36.2	0.028	46.069	249	53.7	0.271	0.274	0.2	1	12.83	0.719408	0	0	0
dimethyl ether	316.15	30.9	0.021	46.069	249	53.7	0.271	0.274	0.2	1	12.83	0.719408	0	0	0
dimethyl ether	316.15	26.4	0.016	46.069	249	53.7	0.271	0.274	0.2	1	12.83	0.719408	0	0	0
dimethyl ether	316.15	22.4	0.011	46.069	249	53.7	0.271	0.274	0.2	1	12.83	0.719408	0	0	0
dimethyl ether	316.15	18.8	0.007	46.069	249	53.7	0.271	0.274	0.2	1	12.83	0.719408	0	0	0
dimethyl ether	316.15	15.9	0.005	46.069	249	53.7	0.271	0.274	0.2	1	12.83	0.719408	0	0	0
dimethyl ether	316.15	13.4	0.003	46.069	249	53.7	0.271	0.274	0.2	1	12.83	0.719408	0	0	0
dimethyl ether	316.15	11.5	0.001	46.069	249	53.7	0.271	0.274	0.2	1	12.83	0.719408	0	0	0
dimethyl ether	316.15	10.3	0.001	46.069	249	53.7	0.271	0.274	0.2	1	12.83	0.719408	0	0	0
dimethyl ether	306.15	79.9	0.072	46.069	249	53.7	0.271	0.274	0.2	1	12.83	0.719408	0	0	0
dimethyl ether	306.15	72.1	0.063	46.069	249	53.7	0.271	0.274	0.2	1	12.83	0.719408	0	0	0
dimethyl ether	306.15	65.6	0.06	46.069	249	53.7	0.271	0.274	0.2	1	12.83	0.719408	0	0	0
dimethyl ether	306.15	58.7	0.052	46.069	249	53.7	0.271	0.274	0.2	1	12.83	0.719408	0	0	0
dimethyl ether	306.15	52.1	0.046	46.069	249	53.7	0.271	0.274	0.2	1	12.83	0.719408	0	0	0
dimethyl ether	306.15	45.5	0.039	46.069	249	53.7	0.271	0.274	0.2	1	12.83	0.719408	0	0	0
dimethyl ether	306.15	38.7	0.03	46.069	249	53.7	0.271	0.274	0.2	1	12.83	0.719408	0	0	0
dimethyl ether	306.15	32.2	0.024	46.069	249	53.7	0.271	0.274	0.2	1	12.83	0.719408	0	0	0
dimethyl ether	306.15	27.3	0.018	46.069	249	53.7	0.271	0.274	0.2	1	12.83	0.719408	0	0	0
dimethyl ether	306.15	23.2	0.013	46.069	249	53.7	0.271	0.274	0.2	1	12.83	0.719408	0	0	0
dimethyl ether	306.15	19.6	0.01	46.069	249	53.7	0.271	0.274	0.2	1	12.83	0.719408	0	0	0
dimethyl ether	306.15	16.5	0.007	46.069	249	53.7	0.271	0.274	0.2	1	12.83	0.719408	0	0	0
dimethyl ether	306.15	14	0.005	46.069	249	53.7	0.271	0.274	0.2	1	12.83	0.719408	0	0	0
dimethyl ether	306.15	11.8	0.003	46.069	249	53.7	0.271	0.274	0.2	1	12.83	0.719408	0	0	0
dimethyl ether	306.15	9.6	0.002	46.069	249	53.7	0.271	0.274	0.2	1	12.83	0.719408	0	0	0
dimethyl ether	306.15	8.5	0.001	46.069	249	53.7	0.271	0.274	0.2	1	12.83	0.719408	0	0	0
dimethyl ether	288.15	71.4	0.058	46.069	249	53.7	0.271	0.274	0.2	1	12.83	0.719408	0	0	0
dimethyl ether	288.15	64.4	0.047	46.069	249	53.7	0.271	0.274	0.2	1	12.83	0.719408	0	0	0
dimethyl ether	288.15	57.4	0.043	46.069	249	53.7	0.271	0.274	0.2	1	12.83	0.719408	0	0	0
dimethyl ether	288.15	50.4	0.038	46.069	249	53.7	0.271	0.274	0.2	1	12.83	0.719408	0	0	0
dimethyl ether	288.15	43.5	0.032	46.069	249	53.7	0.271	0.274	0.2	1	12.83	0.719408	0	0	0
dimethyl ether	288.15	36.9	0.025	46.069	249	53.7	0.271	0.274	0.2	1	12.83	0.719408	0	0	0
dimethyl ether	288.15	30.9	0.02	46.069	249	53.7	0.271	0.274	0.2	1	12.83	0.719408	0	0	0
dimethyl ether	288.15	25.6	0.015	46.069	249	53.7	0.271	0.274	0.2	1	12.83	0.719408	0	0	0
dimethyl ether	288.15	20.9	0.011	46.069	249	53.7	0.271	0.274	0.2	1	12.83	0.719408	0	0	0
dimethyl ether	288.15	16.9	0.008	46.069	249	53.7	0.271	0.274	0.2	1	12.83	0.719408	0	0	0
dimethyl ether	288.15	11.7	0.006	46.069	249	53.7	0.271	0.274	0.2	1	12.83	0.719408	0	0	0
dimethyl ether	288.15	11.2	0.004	46.069	249	53.7	0.271	0.274	0.2	1	12.83	0.719408	0	0	0
dimethyl ether	288.15	9.3	0.003	46.069	249	53.7	0.271	0.274	0.2	1	12.83	0.719408	0	0	0
dimethyl ether	288.15	7.7	0.002	46.069	249	53.7	0.271	0.274	0.2	1	12.83	0.719408	0	0	0
dimethyl ether	288.15	6.3	0.001	46.069	249	53.7	0.271	0.274	0.2	1	12.83	0.719408	0	0	0
dimethyl ether	288.15	5.1	0.001	46.069	249	53.7	0.271	0.274	0.2	1	12.83	0.719408	0	0	0
diphenylmethane	470.65	78.83	0.0625	168.238	535	27.1	0.2988	0.241	0.482	0	15.6	0	0	0	17
diphenylmethane	470.65	21.84	0.0175	168.238	535	27.1	0.2988	0.241	0.482	0	15.6	0	0	0	17
diphenylmethane	425.35	72.27	0.0469	168.238	535	27.1	0.2988	0.241	0.482	0	15.6	0	0	0	17
diphenylmethane	425.35	23.37	0.0155	168.238	535	27.1	0.2988	0.241	0.482	0	15.6	0	0	0	17
diphenylmethane	425.35	19.73	0.0131	168.238	535	27.1	0.2988	0.241	0.482	0	15.6	0	0	0	17
diphenylmethane	373.85	78.73	0.0414	168.238	535	27.1	0.2988	0.241	0.482	0	15.6	0	0	0	17
diphenylmethane	373.85	64.12	0.0311	168.238	535	27.1	0.2988	0.241	0.482	0	15.6	0	0	0	17
diphenylmethane	373.85	23.79	0.0117	168.238	535	27.1	0.2988	0.241	0.482	0	15.6	0	0	0	17
diphenylmethane	373.85	17.41	0.0085	168.238	535	27.1	0.2988	0.241	0.482	0	15.6	0	0	0	17
diphenylmethane	324.15	55.26	0.0179	168.238	535	27.1	0.2988	0.241	0.482	0	15.6	0	0	0	17
diphenylmethane	324.15	24.47	0.0083	168.238	535	27.1	0.2988	0.241	0.482	0	15.6	0	0	0	17
diphenylmethane	324.15	14.98	0.0049	168.238	535	27.1	0.2988	0.241	0.482	0	15.6	0	0	0	17
ethane	283.15	193.05	0.3594	30.07	184.57	48.72	0.2067	0.279	0.1	0	2.4	0	0	0	0
ethane	283.15	172.37	0.2447	30.07	184.57	48.72	0.2067	0.279	0.1	0	2.4	0	0	0	0
ethane	283.15	137.89	0.1623	30.07	184.57	48.72	0.2067	0.279	0.1	0	2.4	0	0	0	0
ethane	283.15	68.95	0.0578	30.07	184.57	48.72	0.2067	0.279	0.1	0	2.4	0	0	0	0
ethane	283.15	41.37	0.0163	30.07	184.57	48.72	0.2067	0.279	0.1	0	2.4	0	0	0	0
ethane	283.15	34.47	0.0051	30.07	184.57	48.72	0.2067	0.279	0.1	0	2.4	0	0	0	0
ethane	255.37	283.7	0.2917	30.07	184.57	48.72	0.2067	0.279	0.1	0	2.4	0	0	0	0
ethane	255.37	275.79	0.2785	30.07	184.57	48.72	0.2067	0.279	0.1	0	2.4	0	0	0	0
ethane	255.37	204.9	0.2027	30.07	184.57	48.72	0.2067	0.279	0.1	0	2.4	0	0	0	0
ethane	255.37	160.5	0.1551	30.07	184.57	48.72	0.2067	0.279	0.1	0	2.4	0	0	0	0
ethane	255.37	137.89	0.1245	30.07	184.57	48.72	0.2067	0.279	0.1	0	2.4	0	0	0	0
ethane	255.37	115.6	0.106	30.07	184.57	48.72	0.2067	0.279	0.1	0	2.4	0	0	0	0
ethane	255.37	82.2	0.0696	30.07	184.57	48.72	0.2067	0.279	0.1	0	2.4	0	0	0	0
ethane	255.37	71.4	0.061	30.07	184.57	48.72	0.2067	0.279	0.1	0	2.4	0	0	0	0
ethane	255.37	68.95	0.0551	30.07	184.57	48.72	0.2067	0.279	0.1	0	2.4	0	0	0	0
ethane	255.37	49.3	0.0347	30.07	184.57	48.72	0.2067	0.279	0.1	0	2.4	0	0	0	0
ethane	255.37	38	0.0258	30.07	184.57	48.72	0.2067	0.279	0.1	0	2.4	0	0	0	0
ethane	255.37	34.47	0.0204	30.07	184.57	48.72	0.2067	0.279	0.1	0	2.4	0	0	0	0
ethane	255.37	20.68	0.0072	30.07	184.57	48.72	0.2067	0.279	0.1	0	2.4	0	0	0	0
ethane	240.15	231.7	0.1969	30.07	184.57	48.72	0.2067	0.279	0.1	0	2.4	0	0	0	0
ethane	240.15	144	0.1192	30.07	184.57	48.72	0.2067	0.279	0.1	0	2.4	0	0	0	0
ethane	240.15	78.9	0.0632	30.07	184.57	48.72	0.2067	0.279	0.1	0	2.4	0	0	0	0
ethane	240.15	49.2	0.0344	30.07	184.57	48.72	0.2067	0.279	0.1	0	2.4	0	0	0	0
ethane	240.15	47.9	0.0341	30.07	184.57	48.72	0.2067	0.279	0.1	0	2.4	0	0	0	0
ethane	228.15	214.5	0.1621	30.07	184.57	48.72	0.2067	0.279	0.1	0	2.4	0	0	0	0
ethane	228.15	147.9	0.112	30.07	184.57	48.72	0.2067	0.279	0.1	0	2.4	0	0	0	0
ethane	228.15	70.6	0.0535	30.07	184.57	48.72	0.2067	0.279	0.1	0	2.4	0	0	0	0
ethane	228.15	31.8	0.0219	30.07	184.57	48.72	0.2067	0.279	0.1	0	2.4	0	0	0	0
ethane	227.59	275.79	0.2011	30.07	184.57	48.72	0.2067	0.279	0.1	0	2.4	0	0	0	0
ethane	227.59	137.89	0.098	30.07	184.57	48.72	0.2067	0.279	0.1	0	2.4	0	0	0	0
ethane	227.59	68.95	0.034	30.07	184.57	48.72	0.2067	0.279	0.1	0	2.4	0	0	0	0
ethane	227.59	34.47	0.0168	30.07	184.57	48.72	0.2067	0.279	0.1	0	2.4	0	0	0	0
ethane	223.15	81.06	0.0557	30.07	184.57	48.72	0.2067	0.279	0.1	0	2.4	0	0	0	0
ethane	223.15	60.8	0.0412	30.07	184.57	48.72	0.2067	0.279	0.1	0	2.4	0	0	0	0
ethane	223.15	40.53	0.0257	30.07	184.57	48.72	0.2067	0.279	0.1	0	2.4	0	0	0	0
ethane	223.15	20.27	0.0118	30.07	184.57	48.72	0.2067	0.279	0.1	0	2.4	0	0	0	0
ethane	212.15	191.3	0.1224	30.07	184.57	48.72	0.2067	0.279	0.1	0	2.4	0	0	0	0
ethane	212.15	87.7	0.0565	30.07	184.57	48.72	0.2067	0.279	0.1	0	2.4	0	0	0	0
ethane	212.15	39.4	0.0263	30.07	184.57	48.72	0.2067	0.279	0.1	0	2.4	0	0	0	0
ethane	198.15	81.06	0.0448	30.07	184.57	48.72	0.2067	0.279	0.1	0	2.4	0	0	0	0
ethane	198.15	60.8	0.0319	30.07	184.57	48.72	0.2067	0.279	0.1	0	2.4	0	0	0	0
ethane	198.15	40.53	0.021	30.07	184.57	48.72	0.2067	0.279	0.1	0	2.4	0	0	0	0
ethane	198.15	20.27	0.0108	30.07	184.57	48.72	0.2067	0.279	0.1	0	2.4	0	0	0	0
ethane	189.55	278.5	0.1353	30.07	184.57	48.72	0.2067	0.279	0.1	0	2.4	0	0	0	0
ethane	189.55	227.1	0.1162	30.07	184.57	48.72	0.2067	0.279	0.1	0	2.4	0	0	0	0
ethane	189.55	152	0.0789	30.07	184.57	48.72	0.2067	0.279	0.1	0	2.4	0	0	0	0
ethane	189.55	127.6	0.068	30.07	184.57	48.72	0.2067	0.279	0.1	0	2.4	0	0	0	0
ethane	189.55	98.6	0.0526	30.07	184.57	48.72	0.2067	0.279	0.1	0	2.4	0	0	0	0
ethane	189.55	57.5	0.0325	30.07	184.57	48.72	0.2067	0.279	0.1	0	2.4	0	0	0	0
ethane	185.93	275.79	0.1323	30.07	184.57	48.72	0.2067	0.279	0.1	0	2.4	0	0	0	0
ethane	185.93	137.89	0.0696	30.07	184.57	48.72	0.2067	0.279	0.1	0	2.4	0	0	0	0
ethane	185.93	68.95	0.034	30.07	184.57	48.72	0.2067	0.279	0.1	0	2.4	0	0	0	0
ethane	185.93	34.47	0.0168	30.07	184.57	48.72	0.2067	0.279	0.1	0	2.4	0	0	0	0
ethane	173.15	81.06	0.0336	30.07	184.57	48.72	0.2067	0.279	0.1	0	2.4	0	0	0	0
ethane	173.15	60.8	0.024	30.07	184.57	48.72	0.2067	0.279	0.1	0	2.4	0	0	0	0
ethane	173.15	40.53	0.0168	30.07	184.57	48.72	0.2067	0.279	0.1	0	2.4	0	0	0	0
ethane	173.15	20.27	0.00888	30.07	184.57	48.72	0.2067	0.279	0.1	0	2.4	0	0	0	0
ethane	169.4	245	0.0975	30.07	184.57	48.72	0.2067	0.279	0.1	0	2.4	0	0	0	0
ethane	169.4	143.5	0.0611	30.07	184.57	48.72	0.2067	0.279	0.1	0	2.4	0	0	0	0
ethane	169.4	67.4	0.0292	30.07	184.57	48.72	0.2067	0.279	0.1	0	2.4	0	0	0	0
ethane	149.5	224	0.0685	30.07	184.57	48.72	0.2067	0.279	0.1	0	2.4	0	0	0	0
ethane	149.5	112.3	0.0365	30.07	184.57	48.72	0.2067	0.279	0.1	0	2.4	0	0	0	0
ethane	149.5	51.4	0.0147	30.07	184.57	48.72	0.2067	0.279	0.1	0	2.4	0	0	0	0
ethane	148.15	81.06	0.0221	30.07	184.57	48.72	0.2067	0.279	0.1	0	2.4	0	0	0	0
ethane	148.15	60.8	0.0156	30.07	184.57	48.72	0.2067	0.279	0.1	0	2.4	0	0	0	0
ethane	148.15	40.53	0.0122	30.07	184.57	48.72	0.2067	0.279	0.1	0	2.4	0	0	0	0
ethane	148.15	20.27	0.00618	30.07	184.57	48.72	0.2067	0.279	0.1	0	2.4	0	0	0	0
ethane	144.26	275.79	0.0747	30.07	184.57	48.72	0.2067	0.279	0.1	0	2.4	0	0	0	0
ethane	144.26	137.89	0.0417	30.07	184.57	48.72	0.2067	0.279	0.1	0	2.4	0	0	0	0
ethane	144.26	68.95	0.0218	30.07	184.57	48.72	0.2067	0.279	0.1	0	2.4	0	0	0	0
ethane	144.26	34.47	0.0114	30.07	184.57	48.72	0.2067	0.279	0.1	0	2.4	0	0	0	0
ethane	129.8	284.3	0.0602	30.07	184.57	48.72	0.2067	0.279	0.1	0	2.4	0	0	0	0
ethane	129.8	177.5	0.0402	30.07	184.57	48.72	0.2067	0.279	0.1	0	2.4	0	0	0	0
ethane	129.8	75	0.0173	30.07	184.57	48.72	0.2067	0.279	0.1	0	2.4	0	0	0	0
ethane	107.85	195	0.0267	30.07	184.57	48.72	0.2067	0.279	0.1	0	2.4	0	0	0	0
ethane	107.85	81.7	0.0124	30.07	184.57	48.72	0.2067	0.279	0.1	0	2.4	0	0	0	0
ethane	102.59	275.79	0.0293	30.07	184.57	48.72	0.2067	0.279	0.1	0	2.4	0	0	0	0
ethane	102.59	137.89	0.017	30.07	184.57	48.72	0.2067	0.279	0.1	0	2.4	0	0	0	0
ethane	102.59	68.95	0.0092	30.07	184.57	48.72	0.2067	0.279	0.1	0	2.4	0	0	0	0
ethane	100.15	210.5	0.0242	30.07	184.57	48.72	0.2067	0.279	0.1	0	2.4	0	0	0	0
ethane	100.15	114.4	0.0152	30.07	184.57	48.72	0.2067	0.279	0.1	0	2.4	0	0	0	0
ethane	95.15	295.7	0.0263	30.07	184.57	48.72	0.2067	0.279	0.1	0	2.4	0	0	0	0
ethane	95.15	219.5	0.0213	30.07	184.57	48.72	0.2067	0.279	0.1	0	2.4	0	0	0	0
ethane	95.15	152.3	0.0161	30.07	184.57	48.72	0.2067	0.279	0.1	0	2.4	0	0	0	0
ethane	95.15	129.6	0.0142	30.07	184.57	48.72	0.2067	0.279	0.1	0	2.4	0	0	0	0
ethane	92.5	233.7	0.0209	30.07	184.57	48.72	0.2067	0.279	0.1	0	2.4	0	0	0	0
ethane	92.5	189.6	0.0181	30.07	184.57	48.72	0.2067	0.279	0.1	0	2.4	0	0	0	0
ethane	92.5	139.2	0.0142	30.07	184.57	48.72	0.2067	0.279	0.1	0	2.4	0	0	0	0
ethane	92.5	75.8	0.0072	30.07	184.57	48.72	0.2067	0.279	0.1	0	2.4	0	0	0	0
ethanediol-1,2	373.15	87.4	0.005388	62.068	470.5	82	0.3638	0.234	0.507	2	45.26	0.893946	0	0	0
ethanediol-1,2	373.15	87.4	0.005388	62.068	470.5	82	0.3638	0.234	0.507	2	45.26	0.893946	0	0	0
ethanediol-1,2	373.15	75	0.004685	62.068	470.5	82	0.3638	0.234	0.507	2	45.26	0.893946	0	0	0
ethanediol-1,2	373.15	75	0.004685	62.068	470.5	82	0.3638	0.234	0.507	2	45.26	0.893946	0	0	0
ethanediol-1,2	373.15	55.4	0.003471	62.068	470.5	82	0.3638	0.234	0.507	2	45.26	0.893946	0	0	0
ethanediol-1,2	373.15	55.4	0.003471	62.068	470.5	82	0.3638	0.234	0.507	2	45.26	0.893946	0	0	0
ethanediol-1,2	373.15	39.4	0.002502	62.068	470.5	82	0.3638	0.234	0.507	2	45.26	0.893946	0	0	0
ethanediol-1,2	373.15	39.4	0.002502	62.068	470.5	82	0.3638	0.234	0.507	2	45.26	0.893946	0	0	0
ethanediol-1,2	323.15	89.7	0.00404	62.068	470.5	82	0.3638	0.234	0.507	2	45.26	0.893946	0	0	0
ethanediol-1,2	323.15	89.7	0.00404	62.068	470.5	82	0.3638	0.234	0.507	2	45.26	0.893946	0	0	0
ethanediol-1,2	323.15	62.6	0.002878	62.068	470.5	82	0.3638	0.234	0.507	2	45.26	0.893946	0	0	0
ethanediol-1,2	323.15	62.6	0.002878	62.068	470.5	82	0.3638	0.234	0.507	2	45.26	0.893946	0	0	0
ethanediol-1,2	323.15	48.3	0.00223	62.068	470.5	82	0.3638	0.234	0.507	2	45.26	0.893946	0	0	0
ethanediol-1,2	323.15	48.3	0.00223	62.068	470.5	82	0.3638	0.234	0.507	2	45.26	0.893946	0	0	0
ethanediol-1,2	323.15	26.8	0.001269	62.068	470.5	82	0.3638	0.234	0.507	2	45.26	0.893946	0	0	0
ethanediol-1,2	323.15	26.8	0.001269	62.068	470.5	82	0.3638	0.234	0.507	2	45.26	0.893946	0	0	0
ethanediol-1,2	298.15	85.9	0.003273	62.068	470.5	82	0.3638	0.234	0.507	2	45.26	0.893946	0	0	0
ethanediol-1,2	298.15	85.9	0.003273	62.068	470.5	82	0.3638	0.234	0.507	2	45.26	0.893946	0	0	0
ethanediol-1,2	298.15	69.6	0.002695	62.068	470.5	82	0.3638	0.234	0.507	2	45.26	0.893946	0	0	0
ethanediol-1,2	298.15	69.6	0.002695	62.068	470.5	82	0.3638	0.234	0.507	2	45.26	0.893946	0	0	0
ethanediol-1,2	298.15	51.5	0.002026	62.068	470.5	82	0.3638	0.234	0.507	2	45.26	0.893946	0	0	0
ethanediol-1,2	298.15	51.5	0.002026	62.068	470.5	82	0.3638	0.234	0.507	2	45.26	0.893946	0	0	0
ethanediol-1,2	298.15	25.3	0.001003	62.068	470.5	82	0.3638	0.234	0.507	2	45.26	0.893946	0	0	0
ethanediol-1,2	298.15	25.3	0.001003	62.068	470.5	82	0.3638	0.234	0.507	2	45.26	0.893946	0	0	0
ethanol	508.15	154	0.1883	46.069	351.5	61.48	0.2759	0.24	0.645	1	23.83	0.84893	0	0	0
ethanol	508.15	151.5	0.17	46.069	351.5	61.48	0.2759	0.24	0.645	1	23.83	0.84893	0	0	0
ethanol	508.15	146.8	0.1518	46.069	351.5	61.48	0.2759	0.24	0.645	1	23.83	0.84893	0	0	0
ethanol	508.15	140.7	0.1349	46.069	351.5	61.48	0.2759	0.24	0.645	1	23.83	0.84893	0	0	0
ethanol	508.15	132.6	0.1169	46.069	351.5	61.48	0.2759	0.24	0.645	1	23.83	0.84893	0	0	0
ethanol	503.15	237	0.2999	46.069	351.5	61.48	0.2759	0.24	0.645	1	23.83	0.84893	0	0	0
ethanol	503.15	237	0.342	46.069	351.5	61.48	0.2759	0.24	0.645	1	23.83	0.84893	0	0	0
ethanol	503.15	231.5	0.2533	46.069	351.5	61.48	0.2759	0.24	0.645	1	23.83	0.84893	0	0	0
ethanol	503.15	220	0.2287	46.069	351.5	61.48	0.2759	0.24	0.645	1	23.83	0.84893	0	0	0
ethanol	498.15	282.1	0.2573	46.069	351.5	61.48	0.2759	0.24	0.645	1	23.83	0.84893	0	0	0
ethanol	498.15	244.5	0.2097	46.069	351.5	61.48	0.2759	0.24	0.645	1	23.83	0.84893	0	0	0
ethanol	498.15	201.2	0.1604	46.069	351.5	61.48	0.2759	0.24	0.645	1	23.83	0.84893	0	0	0
ethanol	498.15	155.1	0.1104	46.069	351.5	61.48	0.2759	0.24	0.645	1	23.83	0.84893	0	0	0
ethanol	498.15	102.9	0.05724	46.069	351.5	61.48	0.2759	0.24	0.645	1	23.83	0.84893	0	0	0
ethanol	476.5	82.4	0.0629	46.069	351.5	61.48	0.2759	0.24	0.645	1	23.83	0.84893	0	0	0
ethanol	475.8	90.3	0.0704	46.069	351.5	61.48	0.2759	0.24	0.645	1	23.83	0.84893	0	0	0
ethanol	463.6	82.6	0.0616	46.069	351.5	61.48	0.2759	0.24	0.645	1	23.83	0.84893	0	0	0
ethanol	463.4	74	0.055	46.069	351.5	61.48	0.2759	0.24	0.645	1	23.83	0.84893	0	0	0
ethanol	449.9	66.9	0.0485	46.069	351.5	61.48	0.2759	0.24	0.645	1	23.83	0.84893	0	0	0
ethanol	449.4	74.5	0.054	46.069	351.5	61.48	0.2759	0.24	0.645	1	23.83	0.84893	0	0	0
ethanol	448.15	288.3	0.1322	46.069	351.5	61.48	0.2759	0.24	0.645	1	23.83	0.84893	0	0	0
ethanol	448.15	219.9	0.1005	46.069	351.5	61.48	0.2759	0.24	0.645	1	23.83	0.84893	0	0	0
ethanol	448.15	148.4	0.06655	46.069	351.5	61.48	0.2759	0.24	0.645	1	23.83	0.84893	0	0	0
ethanol	448.15	93	0.03936	46.069	351.5	61.48	0.2759	0.24	0.645	1	23.83	0.84893	0	0	0
ethanol	448.15	55.4	0.02005	46.069	351.5	61.48	0.2759	0.24	0.645	1	23.83	0.84893	0	0	0
ethanol	438.2	61	0.0452	46.069	351.5	61.48	0.2759	0.24	0.645	1	23.83	0.84893	0	0	0
ethanol	426.5	55.7	0.0426	46.069	351.5	61.48	0.2759	0.24	0.645	1	23.83	0.84893	0	0	0
ethanol	411.2	51	0.038	46.069	351.5	61.48	0.2759	0.24	0.645	1	23.83	0.84893	0	0	0
ethanol	400.2	53.2	0.0386	46.069	351.5	61.48	0.2759	0.24	0.645	1	23.83	0.84893	0	0	0
ethanol	398.15	227.2	0.07437	46.069	351.5	61.48	0.2759	0.24	0.645	1	23.83	0.84893	0	0	0
ethanol	398.15	144.2	0.0479	46.069	351.5	61.48	0.2759	0.24	0.645	1	23.83	0.84893	0	0	0
ethanol	398.15	61.2	0.01989	46.069	351.5	61.48	0.2759	0.24	0.645	1	23.83	0.84893	0	0	0
ethanol	395.8	47.1	0.0342	46.069	351.5	61.48	0.2759	0.24	0.645	1	23.83	0.84893	0	0	0
ethanol	375.3	42.8	0.0302	46.069	351.5	61.48	0.2759	0.24	0.645	1	23.83	0.84893	0	0	0
ethanol	373.8	47.8	0.0326	46.069	351.5	61.48	0.2759	0.24	0.645	1	23.83	0.84893	0	0	0
ethanol	352.6	46.4	0.0269	46.069	351.5	61.48	0.2759	0.24	0.645	1	23.83	0.84893	0	0	0
ethanol	348.15	240.3	0.05957	46.069	351.5	61.48	0.2759	0.24	0.645	1	23.83	0.84893	0	0	0
ethanol	348.15	142.3	0.03533	46.069	351.5	61.48	0.2759	0.24	0.645	1	23.83	0.84893	0	0	0
ethanol	348.15	84.6	0.02082	46.069	351.5	61.48	0.2759	0.24	0.645	1	23.83	0.84893	0	0	0
ethanol	348.15	41	0.01051	46.069	351.5	61.48	0.2759	0.24	0.645	1	23.83	0.84893	0	0	0
ethanol	347.7	39.1	0.0237	46.069	351.5	61.48	0.2759	0.24	0.645	1	23.83	0.84893	0	0	0
ethanol	326.8	44.9	0.0204	46.069	351.5	61.48	0.2759	0.24	0.645	1	23.83	0.84893	0	0	0
ethanol	324.2	37	0.0177	46.069	351.5	61.48	0.2759	0.24	0.645	1	23.83	0.84893	0	0	0
ethanol	299.9	43.8	0.0132	46.069	351.5	61.48	0.2759	0.24	0.645	1	23.83	0.84893	0	0	0
ethanol	298.15	292.6	0.05463	46.069	351.5	61.48	0.2759	0.24	0.645	1	23.83	0.84893	0	0	0
ethanol	298.15	233.2	0.04429	46.069	351.5	61.48	0.2759	0.24	0.645	1	23.83	0.84893	0	0	0
ethanol	298.15	174.3	0.03381	46.069	351.5	61.48	0.2759	0.24	0.645	1	23.83	0.84893	0	0	0
ethanol	298.15	116	0.02292	46.069	351.5	61.48	0.2759	0.24	0.645	1	23.83	0.84893	0	0	0
ethanol	298.15	57.2	0.01161	46.069	351.5	61.48	0.2759	0.24	0.645	1	23.83	0.84893	0	0	0
ethanol	291	31.2	0.0067	46.069	351.5	61.48	0.2759	0.24	0.645	1	23.83	0.84893	0	0	0
ethanol	291	25.6	0.0057	46.069	351.5	61.48	0.2759	0.24	0.645	1	23.83	0.84893	0	0	0
ethanol	291	21.8	0.005	46.069	351.5	61.48	0.2759	0.24	0.645	1	23.83	0.84893	0	0	0
ethanol	291	13.9	0.0031	46.069	351.5	61.48	0.2759	0.24	0.645	1	23.83	0.84893	0	0	0
ethyl acetate	291	46	0.0155	88.106	350.2	38.8	0.3081	0.255	0.366	2	33.5	0.785075	0	1	0
ethyl acetate	291	36	0.0123	88.106	350.2	38.8	0.3081	0.255	0.366	2	33.5	0.785075	0	1	0
ethyl acetate	291	26	0.0095	88.106	350.2	38.8	0.3081	0.255	0.366	2	33.5	0.785075	0	1	0
ethyl acetate	291	16	0.0061	88.106	350.2	38.8	0.3081	0.255	0.366	2	33.5	0.785075	0	1	0
ethyl formate	291	41	0.0112	74.079	327	47.42	0.3235	0.257	0.285	2	32.3	0.814241	0	0	0
ethyl formate	291	31.1	0.0091	74.079	327	47.42	0.3235	0.257	0.285	2	32.3	0.814241	0	0	0
ethyl formate	291	26.1	0.0074	74.079	327	47.42	0.3235	0.257	0.285	2	32.3	0.814241	0	0	0
ethyl formate	291	16	0.0051	74.079	327	47.42	0.3235	0.257	0.285	2	32.3	0.814241	0	0	0
ethylbenzene	295	173.3	0.0547	106.167	409.35	36.09	0.2839	0.263	0.304	0	9.6	0	0	0	9
ethylbenzene	295	138.8	0.044	106.167	409.35	36.09	0.2839	0.263	0.304	0	9.6	0	0	0	9
ethylbenzene	295	104.4	0.0332	106.167	409.35	36.09	0.2839	0.263	0.304	0	9.6	0	0	0	9
ethylene	310.93	275.79	0.159	28.054	169.38	50.41	0.2142	0.281	0.086	0	2.4	0	0	0	0
ethylene	310.93	275.79	0.1622	28.054	169.38	50.41	0.2142	0.281	0.086	0	2.4	0	0	0	0
ethylene	310.93	275.79	0.1613	28.054	169.38	50.41	0.2142	0.281	0.086	0	2.4	0	0	0	0
ethylene	310.93	275.79	0.1615	28.054	169.38	50.41	0.2142	0.281	0.086	0	2.4	0	0	0	0
ethylene	310.93	137.89	0.0847	28.054	169.38	50.41	0.2142	0.281	0.086	0	2.4	0	0	0	0
ethylene	310.93	137.89	0.0846	28.054	169.38	50.41	0.2142	0.281	0.086	0	2.4	0	0	0	0
ethylene	310.93	137.89	0.085	28.054	169.38	50.41	0.2142	0.281	0.086	0	2.4	0	0	0	0
ethylene	310.93	68.95	0.042	28.054	169.38	50.41	0.2142	0.281	0.086	0	2.4	0	0	0	0
ethylene	310.93	68.95	0.0413	28.054	169.38	50.41	0.2142	0.281	0.086	0	2.4	0	0	0	0
ethylene	310.93	68.95	0.041	28.054	169.38	50.41	0.2142	0.281	0.086	0	2.4	0	0	0	0
ethylene	310.93	68.95	0.0421	28.054	169.38	50.41	0.2142	0.281	0.086	0	2.4	0	0	0	0
ethylene	310.93	34.47	0.0196	28.054	169.38	50.41	0.2142	0.281	0.086	0	2.4	0	0	0	0
ethylene	310.93	34.47	0.0194	28.054	169.38	50.41	0.2142	0.281	0.086	0	2.4	0	0	0	0
ethylene	310.93	34.47	0.0198	28.054	169.38	50.41	0.2142	0.281	0.086	0	2.4	0	0	0	0
ethylene	310.93	34.47	0.0201	28.054	169.38	50.41	0.2142	0.281	0.086	0	2.4	0	0	0	0
ethylene	310.93	17.24	0.0085	28.054	169.38	50.41	0.2142	0.281	0.086	0	2.4	0	0	0	0
ethylene	310.93	17.24	0.0081	28.054	169.38	50.41	0.2142	0.281	0.086	0	2.4	0	0	0	0
ethylene	310.93	17.24	0.0079	28.054	169.38	50.41	0.2142	0.281	0.086	0	2.4	0	0	0	0
ethylene	310.93	17.24	0.0074	28.054	169.38	50.41	0.2142	0.281	0.086	0	2.4	0	0	0	0
ethylene	248.15	40.53	0.0212	28.054	169.38	50.41	0.2142	0.281	0.086	0	2.4	0	0	0	0
ethylene	248.15	30.4	0.00988	28.054	169.38	50.41	0.2142	0.281	0.086	0	2.4	0	0	0	0
ethylene	247.15	280.1	0.357	28.054	169.38	50.41	0.2142	0.281	0.086	0	2.4	0	0	0	0
ethylene	247.15	267.2	0.3292	28.054	169.38	50.41	0.2142	0.281	0.086	0	2.4	0	0	0	0
ethylene	247.15	237.5	0.2739	28.054	169.38	50.41	0.2142	0.281	0.086	0	2.4	0	0	0	0
ethylene	247.15	189.2	0.2045	28.054	169.38	50.41	0.2142	0.281	0.086	0	2.4	0	0	0	0
ethylene	247.15	151.3	0.1551	28.054	169.38	50.41	0.2142	0.281	0.086	0	2.4	0	0	0	0
ethylene	247.15	143.6	0.1455	28.054	169.38	50.41	0.2142	0.281	0.086	0	2.4	0	0	0	0
ethylene	247.15	124.3	0.1205	28.054	169.38	50.41	0.2142	0.281	0.086	0	2.4	0	0	0	0
ethylene	247.15	91.2	0.0817	28.054	169.38	50.41	0.2142	0.281	0.086	0	2.4	0	0	0	0
ethylene	247.15	76.9	0.0648	28.054	169.38	50.41	0.2142	0.281	0.086	0	2.4	0	0	0	0
ethylene	247.15	51.8	0.0354	28.054	169.38	50.41	0.2142	0.281	0.086	0	2.4	0	0	0	0
ethylene	235.15	267.7	0.2554	28.054	169.38	50.41	0.2142	0.281	0.086	0	2.4	0	0	0	0
ethylene	235.15	254	0.2407	28.054	169.38	50.41	0.2142	0.281	0.086	0	2.4	0	0	0	0
ethylene	235.15	213.8	0.1979	28.054	169.38	50.41	0.2142	0.281	0.086	0	2.4	0	0	0	0
ethylene	235.15	203.3	0.1866	28.054	169.38	50.41	0.2142	0.281	0.086	0	2.4	0	0	0	0
ethylene	235.15	182.4	0.1662	28.054	169.38	50.41	0.2142	0.281	0.086	0	2.4	0	0	0	0
ethylene	235.15	136.7	0.1205	28.054	169.38	50.41	0.2142	0.281	0.086	0	2.4	0	0	0	0
ethylene	235.15	128.9	0.1116	28.054	169.38	50.41	0.2142	0.281	0.086	0	2.4	0	0	0	0
ethylene	235.15	84.3	0.0683	28.054	169.38	50.41	0.2142	0.281	0.086	0	2.4	0	0	0	0
ethylene	235.15	53.3	0.0327	28.054	169.38	50.41	0.2142	0.281	0.086	0	2.4	0	0	0	0
ethylene	223.15	81.06	0.0603	28.054	169.38	50.41	0.2142	0.281	0.086	0	2.4	0	0	0	0
ethylene	223.15	60.8	0.0448	28.054	169.38	50.41	0.2142	0.281	0.086	0	2.4	0	0	0	0
ethylene	223.15	40.53	0.0265	28.054	169.38	50.41	0.2142	0.281	0.086	0	2.4	0	0	0	0
ethylene	223.15	20.27	0.00843	28.054	169.38	50.41	0.2142	0.281	0.086	0	2.4	0	0	0	0
ethylene	220.15	274.3	0.2112	28.054	169.38	50.41	0.2142	0.281	0.086	0	2.4	0	0	0	0
ethylene	220.15	207.9	0.1594	28.054	169.38	50.41	0.2142	0.281	0.086	0	2.4	0	0	0	0
ethylene	220.15	146.3	0.1105	28.054	169.38	50.41	0.2142	0.281	0.086	0	2.4	0	0	0	0
ethylene	220.15	126.2	0.0954	28.054	169.38	50.41	0.2142	0.281	0.086	0	2.4	0	0	0	0
ethylene	220.15	92.7	0.0676	28.054	169.38	50.41	0.2142	0.281	0.086	0	2.4	0	0	0	0
ethylene	220.15	74.7	0.0535	28.054	169.38	50.41	0.2142	0.281	0.086	0	2.4	0	0	0	0
ethylene	220.15	48.2	0.032	28.054	169.38	50.41	0.2142	0.281	0.086	0	2.4	0	0	0	0
ethylene	220.15	46.3	0.0306	28.054	169.38	50.41	0.2142	0.281	0.086	0	2.4	0	0	0	0
ethylene	205.15	292.7	0.1843	28.054	169.38	50.41	0.2142	0.281	0.086	0	2.4	0	0	0	0
ethylene	205.15	185.8	0.1191	28.054	169.38	50.41	0.2142	0.281	0.086	0	2.4	0	0	0	0
ethylene	205.15	92.7	0.0596	28.054	169.38	50.41	0.2142	0.281	0.086	0	2.4	0	0	0	0
ethylene	205.15	48.5	0.0297	28.054	169.38	50.41	0.2142	0.281	0.086	0	2.4	0	0	0	0
ethylene	198.15	81.06	0.0489	28.054	169.38	50.41	0.2142	0.281	0.086	0	2.4	0	0	0	0
ethylene	198.15	60.8	0.037	28.054	169.38	50.41	0.2142	0.281	0.086	0	2.4	0	0	0	0
ethylene	198.15	40.53	0.0207	28.054	169.38	50.41	0.2142	0.281	0.086	0	2.4	0	0	0	0
ethylene	198.15	20.27	0.01	28.054	169.38	50.41	0.2142	0.281	0.086	0	2.4	0	0	0	0
ethylene	189.55	201.3	0.0998	28.054	169.38	50.41	0.2142	0.281	0.086	0	2.4	0	0	0	0
ethylene	189.55	118.6	0.0655	28.054	169.38	50.41	0.2142	0.281	0.086	0	2.4	0	0	0	0
ethylene	175.15	272.3	0.1123	28.054	169.38	50.41	0.2142	0.281	0.086	0	2.4	0	0	0	0
ethylene	175.15	172.4	0.0682	28.054	169.38	50.41	0.2142	0.281	0.086	0	2.4	0	0	0	0
ethylene	173.15	81.06	0.0361	28.054	169.38	50.41	0.2142	0.281	0.086	0	2.4	0	0	0	0
ethylene	173.15	60.8	0.0281	28.054	169.38	50.41	0.2142	0.281	0.086	0	2.4	0	0	0	0
ethylene	173.15	40.53	0.0164	28.054	169.38	50.41	0.2142	0.281	0.086	0	2.4	0	0	0	0
ethylene	173.15	20.27	0.00865	28.054	169.38	50.41	0.2142	0.281	0.086	0	2.4	0	0	0	0
ethylene	166.15	215.8	0.0786	28.054	169.38	50.41	0.2142	0.281	0.086	0	2.4	0	0	0	0
ethylene	158.15	299.1	0.0957	28.054	169.38	50.41	0.2142	0.281	0.086	0	2.4	0	0	0	0
ethylene	158.15	154.1	0.0533	28.054	169.38	50.41	0.2142	0.281	0.086	0	2.4	0	0	0	0
ethylene	148.15	81.06	0.0266	28.054	169.38	50.41	0.2142	0.281	0.086	0	2.4	0	0	0	0
ethylene	148.15	60.8	0.0185	28.054	169.38	50.41	0.2142	0.281	0.086	0	2.4	0	0	0	0
ethylene	148.15	40.53	0.0131	28.054	169.38	50.41	0.2142	0.281	0.086	0	2.4	0	0	0	0
ethylene	148.15	20.27	0.00743	28.054	169.38	50.41	0.2142	0.281	0.086	0	2.4	0	0	0	0
ethylene	123.15	81.06	0.0146	28.054	169.38	50.41	0.2142	0.281	0.086	0	2.4	0	0	0	0
ethylene	123.15	60.8	0.0127	28.054	169.38	50.41	0.2142	0.281	0.086	0	2.4	0	0	0	0
ethylene	123.15	40.53	0.00932	28.054	169.38	50.41	0.2142	0.281	0.086	0	2.4	0	0	0	0
ethylene	123.15	20.27	0.00531	28.054	169.38	50.41	0.2142	0.281	0.086	0	2.4	0	0	0	0
ethylene	114.15	185.9	0.0249	28.054	169.38	50.41	0.2142	0.281	0.086	0	2.4	0	0	0	0
ethylene glycol dimethyl ether	373.15	97.3	0.05473	90.122	358	38.71	0.333	0.235	0.346	3	47.09	0.821618	0	0	0
ethylene glycol dimethyl ether	373.15	79.6	0.04501	90.122	358	38.71	0.333	0.235	0.346	3	47.09	0.821618	0	0	0
ethylene glycol dimethyl ether	373.15	45.16	0.02583	90.122	358	38.71	0.333	0.235	0.346	3	47.09	0.821618	0	0	0
ethylene glycol dimethyl ether	373.15	22.19	0.0128	90.122	358	38.71	0.333	0.235	0.346	3	47.09	0.821618	0	0	0
ethylene glycol dimethyl ether	373.15	21.27	0.01183	90.122	358	38.71	0.333	0.235	0.346	3	47.09	0.821618	0	0	0
ethylene glycol dimethyl ether	323.15	98.2	0.04028	90.122	358	38.71	0.333	0.235	0.346	3	47.09	0.821618	0	0	0
ethylene glycol dimethyl ether	323.15	70.8	0.02947	90.122	358	38.71	0.333	0.235	0.346	3	47.09	0.821618	0	0	0
ethylene glycol dimethyl ether	323.15	49.16	0.02085	90.122	358	38.71	0.333	0.235	0.346	3	47.09	0.821618	0	0	0
ethylene glycol dimethyl ether	323.15	44.79	0.0188	90.122	358	38.71	0.333	0.235	0.346	3	47.09	0.821618	0	0	0
ethylene glycol dimethyl ether	323.15	17.82	0.007757	90.122	358	38.71	0.333	0.235	0.346	3	47.09	0.821618	0	0	0
ethylene glycol dimethyl ether	323.15	17.07	0.007352	90.122	358	38.71	0.333	0.235	0.346	3	47.09	0.821618	0	0	0
ethylene glycol dimethyl ether	298.15	95.3	0.03272	90.122	358	38.71	0.333	0.235	0.346	3	47.09	0.821618	0	0	0
ethylene glycol dimethyl ether	298.15	74.3	0.0257	90.122	358	38.71	0.333	0.235	0.346	3	47.09	0.821618	0	0	0
ethylene glycol dimethyl ether	298.15	45.82	0.01623	90.122	358	38.71	0.333	0.235	0.346	3	47.09	0.821618	0	0	0
ethylene glycol dimethyl ether	298.15	11.59	0.004189	90.122	358	38.71	0.333	0.235	0.346	3	47.09	0.821618	0	0	0
fluoroheptane	308.15	1.01	0.001492	118.195	391.15	31.75	0.3057	0.267	0.319	0	9.6	0	0	0	5
fluoroheptane	298.15	1.01	0.0014007	118.195	391.15	31.75	0.3057	0.267	0.319	0	9.6	0	0	0	5
fluoroheptane	285.25	1.01	0.0012922	118.195	391.15	31.75	0.3057	0.267	0.319	0	9.6	0	0	0	5
fluoroheptane	273.15	1.01	0.0011927	118.195	391.15	31.75	0.3057	0.267	0.319	0	9.6	0	0	0	5
fluoroheptane	248.15	1.01	0.0010037	118.195	391.15	31.75	0.3057	0.267	0.319	0	9.6	0	0	0	5
furan	402	139.5	0.0805	68.075	304.7	55	0.3123	0.294	0.202	1	15.23	0.606041	0	0	2
furan	402	127.3	0.0727	68.075	304.7	55	0.3123	0.294	0.202	1	15.23	0.606041	0	0	2
furan	402	106.5	0.059	68.075	304.7	55	0.3123	0.294	0.202	1	15.23	0.606041	0	0	2
furan	402	80.3	0.0426	68.075	304.7	55	0.3123	0.294	0.202	1	15.23	0.606041	0	0	2
furan	402	38.9	0.0144	68.075	304.7	55	0.3123	0.294	0.202	1	15.23	0.606041	0	0	2
furan	371.5	132.2	0.062	68.075	304.7	55	0.3123	0.294	0.202	1	15.23	0.606041	0	0	2
furan	371.5	121.6	0.0569	68.075	304.7	55	0.3123	0.294	0.202	1	15.23	0.606041	0	0	2
furan	371.5	96.8	0.0433	68.075	304.7	55	0.3123	0.294	0.202	1	15.23	0.606041	0	0	2
furan	371.5	73	0.0317	68.075	304.7	55	0.3123	0.294	0.202	1	15.23	0.606041	0	0	2
furan	342.5	149.3	0.0554	68.075	304.7	55	0.3123	0.294	0.202	1	15.23	0.606041	0	0	2
furan	342.5	119.4	0.0439	68.075	304.7	55	0.3123	0.294	0.202	1	15.23	0.606041	0	0	2
furan	342.5	100.8	0.036	68.075	304.7	55	0.3123	0.294	0.202	1	15.23	0.606041	0	0	2
furan	342.5	88.5	0.0332	68.075	304.7	55	0.3123	0.294	0.202	1	15.23	0.606041	0	0	2
furan	342.5	52.1	0.0174	68.075	304.7	55	0.3123	0.294	0.202	1	15.23	0.606041	0	0	2
furfural	476.1	124.5	0.0381	96.086	434.7	56.6	0.3813	0.256	0.368	2	38.61	0.78244	0	0	38
furfural	476.1	99.5	0.0305	96.086	434.7	56.6	0.3813	0.256	0.368	2	38.61	0.78244	0	0	38
furfural	476.1	69.6	0.0229	96.086	434.7	56.6	0.3813	0.256	0.368	2	38.61	0.78244	0	0	38
furfural	423.15	265.65	0.068	96.086	434.7	56.6	0.3813	0.256	0.368	2	38.61	0.78244	0	0	8
furfural	423.15	232.58	0.0633	96.086	434.7	56.6	0.3813	0.256	0.368	2	38.61	0.78244	0	0	0
furfural	423.15	222.91	0.0596	96.086	434.7	56.6	0.3813	0.256	0.368	2	38.61	0.78244	0	0	0
furfural	423.15	211.23	0.0565	96.086	434.7	56.6	0.3813	0.256	0.368	2	38.61	0.78244	0	0	0
furfural	423.15	151.23	0.0418	96.086	434.7	56.6	0.3813	0.256	0.368	2	38.61	0.78244	0	0	0
furfural	423.15	139.9	0.0396	96.086	434.7	56.6	0.3813	0.256	0.368	2	38.61	0.78244	0	0	0
furfural	423.15	128.86	0.037	96.086	434.7	56.6	0.3813	0.256	0.368	2	38.61	0.78244	0	0	0
furfural	423.15	111.37	0.0315	96.086	434.7	56.6	0.3813	0.256	0.368	2	38.61	0.78244	0	0	0
furfural	423.15	108.82	0.0325	96.086	434.7	56.6	0.3813	0.256	0.368	2	38.61	0.78244	0	0	0
furfural	423.15	107.01	0.0286	96.086	434.7	56.6	0.3813	0.256	0.368	2	38.61	0.78244	0	0	0
furfural	423.15	70.17	0.0211	96.086	434.7	56.6	0.3813	0.256	0.368	2	38.61	0.78244	0	0	0
furfural	423.15	68.95	0.0201	96.086	434.7	56.6	0.3813	0.256	0.368	2	38.61	0.78244	0	0	0
furfural	423.15	67.02	0.0203	96.086	434.7	56.6	0.3813	0.256	0.368	2	38.61	0.78244	0	0	0
furfural	423.15	54.47	0.0164	96.086	434.7	56.6	0.3813	0.256	0.368	2	38.61	0.78244	0	0	0
furfural	399.2	124.4	0.029	96.086	434.7	56.6	0.3813	0.256	0.368	2	38.61	0.78244	0	0	38
furfural	399.2	99.5	0.0229	96.086	434.7	56.6	0.3813	0.256	0.368	2	38.61	0.78244	0	0	38
furfural	399.2	69.7	0.0154	96.086	434.7	56.6	0.3813	0.256	0.368	2	38.61	0.78244	0	0	38
furfural	399.15	252.54	0.0568	96.086	434.7	56.6	0.3813	0.256	0.368	2	38.61	0.78244	0	0	0
furfural	399.15	206.83	0.0476	96.086	434.7	56.6	0.3813	0.256	0.368	2	38.61	0.78244	0	0	0
furfural	399.15	201.34	0.0464	96.086	434.7	56.6	0.3813	0.256	0.368	2	38.61	0.78244	0	0	0
furfural	399.15	196.7	0.0461	96.086	434.7	56.6	0.3813	0.256	0.368	2	38.61	0.78244	0	0	0
furfural	399.15	173.12	0.0408	96.086	434.7	56.6	0.3813	0.256	0.368	2	38.61	0.78244	0	0	0
furfural	399.15	165.03	0.0373	96.086	434.7	56.6	0.3813	0.256	0.368	2	38.61	0.78244	0	0	0
furfural	399.15	155.98	0.0365	96.086	434.7	56.6	0.3813	0.256	0.368	2	38.61	0.78244	0	0	0
furfural	399.15	143.55	0.0319	96.086	434.7	56.6	0.3813	0.256	0.368	2	38.61	0.78244	0	0	0
furfural	399.15	114.8	0.0271	96.086	434.7	56.6	0.3813	0.256	0.368	2	38.61	0.78244	0	0	0
furfural	399.15	111.4	0.027	96.086	434.7	56.6	0.3813	0.256	0.368	2	38.61	0.78244	0	0	0
furfural	399.15	87.33	0.0228	96.086	434.7	56.6	0.3813	0.256	0.368	2	38.61	0.78244	0	0	0
furfural	399.15	84.15	0.0206	96.086	434.7	56.6	0.3813	0.256	0.368	2	38.61	0.78244	0	0	0
furfural	399.15	64.9	0.0158	96.086	434.7	56.6	0.3813	0.256	0.368	2	38.61	0.78244	0	0	0
furfural	399.15	63.7	0.0158	96.086	434.7	56.6	0.3813	0.256	0.368	2	38.61	0.78244	0	0	0
furfural	323.8	121.32	0.0611	96.086	434.7	56.6	0.3813	0.256	0.368	2	38.61	0.78244	0	0	38
furfural	323.8	108.95	0.0572	96.086	434.7	56.6	0.3813	0.256	0.368	2	38.61	0.78244	0	0	38
furfural	323.8	101.44	0.0541	96.086	434.7	56.6	0.3813	0.256	0.368	2	38.61	0.78244	0	0	38
furfural	323.15	250.88	0.037	96.086	434.7	56.6	0.3813	0.256	0.368	2	38.61	0.78244	0	0	0
furfural	323.15	242.6	0.0345	96.086	434.7	56.6	0.3813	0.256	0.368	2	38.61	0.78244	0	0	0
furfural	323.15	227.15	0.0332	96.086	434.7	56.6	0.3813	0.256	0.368	2	38.61	0.78244	0	0	0
furfural	323.15	188.65	0.0291	96.086	434.7	56.6	0.3813	0.256	0.368	2	38.61	0.78244	0	0	0
furfural	323.15	182.66	0.0268	96.086	434.7	56.6	0.3813	0.256	0.368	2	38.61	0.78244	0	0	0
furfural	323.15	150.78	0.0243	96.086	434.7	56.6	0.3813	0.256	0.368	2	38.61	0.78244	0	0	0
furfural	323.15	108.9	0.0164	96.086	434.7	56.6	0.3813	0.256	0.368	2	38.61	0.78244	0	0	38
furfural	323.15	78.43	0.0135	96.086	434.7	56.6	0.3813	0.256	0.368	2	38.61	0.78244	0	0	38
furfural	323.15	54.14	0.0094	96.086	434.7	56.6	0.3813	0.256	0.368	2	38.61	0.78244	0	0	38
furfural	323.15	52.86	0.0086	96.086	434.7	56.6	0.3813	0.256	0.368	2	38.61	0.78244	0	0	38
furfural	323.15	51.11	0.009	96.086	434.7	56.6	0.3813	0.256	0.368	2	38.61	0.78244	0	0	38
furfural	323.1	124.5	0.0138	96.086	434.7	56.6	0.3813	0.256	0.368	2	38.61	0.78244	0	0	38
furfuryl alcohol	423.15	260.48	0.0617	98.101	443.65	51	0.373	0.255	0.521	2	41.77	0.798899	0	0	0
furfuryl alcohol	423.15	240.02	0.0558	98.101	443.65	51	0.373	0.255	0.521	2	41.77	0.798899	0	0	0
furfuryl alcohol	423.15	204.67	0.0496	98.101	443.65	51	0.373	0.255	0.521	2	41.77	0.798899	0	0	0
furfuryl alcohol	423.15	198.48	0.0467	98.101	443.65	51	0.373	0.255	0.521	2	41.77	0.798899	0	0	0
furfuryl alcohol	423.15	194.19	0.0459	98.101	443.65	51	0.373	0.255	0.521	2	41.77	0.798899	0	0	0
furfuryl alcohol	423.15	162.25	0.0384	98.101	443.65	51	0.373	0.255	0.521	2	41.77	0.798899	0	0	0
furfuryl alcohol	423.15	159.12	0.0368	98.101	443.65	51	0.373	0.255	0.521	2	41.77	0.798899	0	0	0
furfuryl alcohol	423.15	154.34	0.0362	98.101	443.65	51	0.373	0.255	0.521	2	41.77	0.798899	0	0	0
furfuryl alcohol	423.15	104.82	0.0257	98.101	443.65	51	0.373	0.255	0.521	2	41.77	0.798899	0	0	0
furfuryl alcohol	423.15	102.11	0.0254	98.101	443.65	51	0.373	0.255	0.521	2	41.77	0.798899	0	0	0
furfuryl alcohol	423.15	61.36	0.0158	98.101	443.65	51	0.373	0.255	0.521	2	41.77	0.798899	0	0	0
furfuryl alcohol	423.15	54.68	0.0134	98.101	443.65	51	0.373	0.255	0.521	2	41.77	0.798899	0	0	0
furfuryl alcohol	423.15	51.97	0.0116	98.101	443.65	51	0.373	0.255	0.521	2	41.77	0.798899	0	0	0
furfuryl alcohol	373.15	259.05	0.044	98.101	443.65	51	0.373	0.255	0.521	2	41.77	0.798899	0	0	0
furfuryl alcohol	373.15	249.49	0.0419	98.101	443.65	51	0.373	0.255	0.521	2	41.77	0.798899	0	0	0
furfuryl alcohol	373.15	211.5	0.0384	98.101	443.65	51	0.373	0.255	0.521	2	41.77	0.798899	0	0	0
furfuryl alcohol	373.15	206.98	0.037	98.101	443.65	51	0.373	0.255	0.521	2	41.77	0.798899	0	0	0
furfuryl alcohol	373.15	199.13	0.0351	98.101	443.65	51	0.373	0.255	0.521	2	41.77	0.798899	0	0	0
furfuryl alcohol	373.15	159.4	0.0289	98.101	443.65	51	0.373	0.255	0.521	2	41.77	0.798899	0	0	0
furfuryl alcohol	373.15	155.74	0.0274	98.101	443.65	51	0.373	0.255	0.521	2	41.77	0.798899	0	0	0
furfuryl alcohol	373.15	114.45	0.0215	98.101	443.65	51	0.373	0.255	0.521	2	41.77	0.798899	0	0	0
furfuryl alcohol	373.15	113.11	0.0204	98.101	443.65	51	0.373	0.255	0.521	2	41.77	0.798899	0	0	0
furfuryl alcohol	373.15	107.29	0.0202	98.101	443.65	51	0.373	0.255	0.521	2	41.77	0.798899	0	0	0
furfuryl alcohol	373.15	62.96	0.0117	98.101	443.65	51	0.373	0.255	0.521	2	41.77	0.798899	0	0	0
furfuryl alcohol	373.15	61.54	0.0115	98.101	443.65	51	0.373	0.255	0.521	2	41.77	0.798899	0	0	0
furfuryl alcohol	323.15	263.48	0.0334	98.101	443.65	51	0.373	0.255	0.521	2	41.77	0.798899	0	0	0
furfuryl alcohol	323.15	257	0.0319	98.101	443.65	51	0.373	0.255	0.521	2	41.77	0.798899	0	0	0
furfuryl alcohol	323.15	215.3	0.0269	98.101	443.65	51	0.373	0.255	0.521	2	41.77	0.798899	0	0	0
furfuryl alcohol	323.15	200.96	0.026	98.101	443.65	51	0.373	0.255	0.521	2	41.77	0.798899	0	0	0
furfuryl alcohol	323.15	196.8	0.0255	98.101	443.65	51	0.373	0.255	0.521	2	41.77	0.798899	0	0	0
furfuryl alcohol	323.15	182.19	0.0234	98.101	443.65	51	0.373	0.255	0.521	2	41.77	0.798899	0	0	0
furfuryl alcohol	323.15	160.33	0.0211	98.101	443.65	51	0.373	0.255	0.521	2	41.77	0.798899	0	0	0
furfuryl alcohol	323.15	154.86	0.0201	98.101	443.65	51	0.373	0.255	0.521	2	41.77	0.798899	0	0	0
furfuryl alcohol	323.15	150.38	0.0194	98.101	443.65	51	0.373	0.255	0.521	2	41.77	0.798899	0	0	0
furfuryl alcohol	323.15	117.47	0.0153	98.101	443.65	51	0.373	0.255	0.521	2	41.77	0.798899	0	0	0
furfuryl alcohol	323.15	107.67	0.0144	98.101	443.65	51	0.373	0.255	0.521	2	41.77	0.798899	0	0	0
furfuryl alcohol	323.15	58.18	0.0084	98.101	443.65	51	0.373	0.255	0.521	2	41.77	0.798899	0	0	0
furfuryl alcohol	323.15	55.55	0.0076	98.101	443.65	51	0.373	0.255	0.521	2	41.77	0.798899	0	0	0
furfuryl alcohol	323.15	53.57	0.0069	98.101	443.65	51	0.373	0.255	0.521	2	41.77	0.798899	0	0	0
guaiacol	424.65	78.31	0.0422	124.139	478.2	40.57	0.3517	0.247	0.654	2	40.26	0.731744	0	0	6
guaiacol	424.53	146.6	0.0808	124.139	478.2	40.57	0.3517	0.247	0.654	2	40.26	0.731744	0	0	6
guaiacol	423.98	84.87	0.0435	124.139	478.2	40.57	0.3517	0.247	0.654	2	40.26	0.731744	0	0	6
guaiacol	423.35	69.04	0.0395	124.139	478.2	40.57	0.3517	0.247	0.654	2	40.26	0.731744	0	0	6
guaiacol	422.78	62	0.035	124.139	478.2	40.57	0.3517	0.247	0.654	2	40.26	0.731744	0	0	6
guaiacol	422.67	68.28	0.0371	124.139	478.2	40.57	0.3517	0.247	0.654	2	40.26	0.731744	0	0	6
guaiacol	422.17	153.91	0.0816	124.139	478.2	40.57	0.3517	0.247	0.654	2	40.26	0.731744	0	0	6
guaiacol	421.73	120.5	0.068	124.139	478.2	40.57	0.3517	0.247	0.654	2	40.26	0.731744	0	0	6
guaiacol	421.65	118.5	0.0625	124.139	478.2	40.57	0.3517	0.247	0.654	2	40.26	0.731744	0	0	6
guaiacol	421.51	144.14	0.0745	124.139	478.2	40.57	0.3517	0.247	0.654	2	40.26	0.731744	0	0	6
guaiacol	421.22	99.12	0.0552	124.139	478.2	40.57	0.3517	0.247	0.654	2	40.26	0.731744	0	0	6
guaiacol	421.15	57.5	0.034	124.139	478.2	40.57	0.3517	0.247	0.654	2	40.26	0.731744	0	0	6
guaiacol	421.11	106.9	0.0563	124.139	478.2	40.57	0.3517	0.247	0.654	2	40.26	0.731744	0	0	6
guaiacol	421.05	59.84	0.0348	124.139	478.2	40.57	0.3517	0.247	0.654	2	40.26	0.731744	0	0	6
guaiacol	420.65	49.35	0.0289	124.139	478.2	40.57	0.3517	0.247	0.654	2	40.26	0.731744	0	0	6
guaiacol	374.94	119.33	0.047	124.139	478.2	40.57	0.3517	0.247	0.654	2	40.26	0.731744	0	0	6
guaiacol	374.85	133.38	0.0523	124.139	478.2	40.57	0.3517	0.247	0.654	2	40.26	0.731744	0	0	6
guaiacol	373.83	71.21	0.0312	124.139	478.2	40.57	0.3517	0.247	0.654	2	40.26	0.731744	0	0	6
guaiacol	373.75	60.65	0.0255	124.139	478.2	40.57	0.3517	0.247	0.654	2	40.26	0.731744	0	0	6
guaiacol	373.7	78.05	0.031	124.139	478.2	40.57	0.3517	0.247	0.654	2	40.26	0.731744	0	0	6
guaiacol	373.7	68.25	0.0278	124.139	478.2	40.57	0.3517	0.247	0.654	2	40.26	0.731744	0	0	6
guaiacol	373.23	95.59	0.0412	124.139	478.2	40.57	0.3517	0.247	0.654	2	40.26	0.731744	0	0	6
guaiacol	373.02	106.95	0.0424	124.139	478.2	40.57	0.3517	0.247	0.654	2	40.26	0.731744	0	0	6
guaiacol	372.85	64.5	0.0275	124.139	478.2	40.57	0.3517	0.247	0.654	2	40.26	0.731744	0	0	6
guaiacol	372.59	60.2	0.0245	124.139	478.2	40.57	0.3517	0.247	0.654	2	40.26	0.731744	0	0	6
guaiacol	372.57	57.23	0.0236	124.139	478.2	40.57	0.3517	0.247	0.654	2	40.26	0.731744	0	0	6
guaiacol	371.58	91.92	0.0384	124.139	478.2	40.57	0.3517	0.247	0.654	2	40.26	0.731744	0	0	6
guaiacol	371.52	164.32	0.0634	124.139	478.2	40.57	0.3517	0.247	0.654	2	40.26	0.731744	0	0	6
guaiacol	370.39	125.65	0.0509	124.139	478.2	40.57	0.3517	0.247	0.654	2	40.26	0.731744	0	0	6
guaiacol	370.35	122.24	0.0468	124.139	478.2	40.57	0.3517	0.247	0.654	2	40.26	0.731744	0	0	6
guaiacol	370.34	143.74	0.0576	124.139	478.2	40.57	0.3517	0.247	0.654	2	40.26	0.731744	0	0	6
guaiacol	326.21	123.18	0.0429	124.139	478.2	40.57	0.3517	0.247	0.654	2	40.26	0.731744	0	0	6
guaiacol	324.5	178.38	0.0613	124.139	478.2	40.57	0.3517	0.247	0.654	2	40.26	0.731744	0	0	6
guaiacol	324.22	150.2	0.0488	124.139	478.2	40.57	0.3517	0.247	0.654	2	40.26	0.731744	0	0	6
guaiacol	324.05	160.5	0.0561	124.139	478.2	40.57	0.3517	0.247	0.654	2	40.26	0.731744	0	0	6
guaiacol	323.35	50	0.0184	124.139	478.2	40.57	0.3517	0.247	0.654	2	40.26	0.731744	0	0	6
guaiacol	323.3	52.02	0.0187	124.139	478.2	40.57	0.3517	0.247	0.654	2	40.26	0.731744	0	0	6
guaiacol	323.12	72.31	0.0249	124.139	478.2	40.57	0.3517	0.247	0.654	2	40.26	0.731744	0	0	6
guaiacol	322.95	75.5	0.027	124.139	478.2	40.57	0.3517	0.247	0.654	2	40.26	0.731744	0	0	6
guaiacol	322.51	110.28	0.0355	124.139	478.2	40.57	0.3517	0.247	0.654	2	40.26	0.731744	0	0	6
guaiacol	322.11	68.51	0.0222	124.139	478.2	40.57	0.3517	0.247	0.654	2	40.26	0.731744	0	0	6
guaiacol	322.01	58.52	0.0203	124.139	478.2	40.57	0.3517	0.247	0.654	2	40.26	0.731744	0	0	6
guaiacol	322	62.28	0.0212	124.139	478.2	40.57	0.3517	0.247	0.654	2	40.26	0.731744	0	0	6
guaiacol	321.65	80.76	0.0282	124.139	478.2	40.57	0.3517	0.247	0.654	2	40.26	0.731744	0	0	6
guaiacol	321.63	96.89	0.0309	124.139	478.2	40.57	0.3517	0.247	0.654	2	40.26	0.731744	0	0	6
guaiacol	321.52	142.48	0.0449	124.139	478.2	40.57	0.3517	0.247	0.654	2	40.26	0.731744	0	0	6
guaiacol	321.52	137.78	0.0439	124.139	478.2	40.57	0.3517	0.247	0.654	2	40.26	0.731744	0	0	6
guaiacol	321.47	204.83	0.0674	124.139	478.2	40.57	0.3517	0.247	0.654	2	40.26	0.731744	0	0	6
methane	183.12	75.39	0.1487	16.043	111.67	45.99	0.1627	0.286	0.012	0	1.2	0	0	0	0
methane	183.12	74.33	0.1257	16.043	111.67	45.99	0.1627	0.286	0.012	0	1.2	0	0	0	0
methane	183.12	74.12	0.1269	16.043	111.67	45.99	0.1627	0.286	0.012	0	1.2	0	0	0	0
methane	183.12	73.42	0.1234	16.043	111.67	45.99	0.1627	0.286	0.012	0	1.2	0	0	0	0
methane	183.12	71.05	0.1084	16.043	111.67	45.99	0.1627	0.286	0.012	0	1.2	0	0	0	0
methane	183.12	69.02	0.0994	16.043	111.67	45.99	0.1627	0.286	0.012	0	1.2	0	0	0	0
methane	183.12	63.43	0.0734	16.043	111.67	45.99	0.1627	0.286	0.012	0	1.2	0	0	0	0
methane	183.12	63.09	0.074	16.043	111.67	45.99	0.1627	0.286	0.012	0	1.2	0	0	0	0
methane	183.12	56.19	0.0529	16.043	111.67	45.99	0.1627	0.286	0.012	0	1.2	0	0	0	0
methane	183.12	49.26	0.0328	16.043	111.67	45.99	0.1627	0.286	0.012	0	1.2	0	0	0	0
methane	183.12	44.88	0.0203	16.043	111.67	45.99	0.1627	0.286	0.012	0	1.2	0	0	0	0
methane	183.12	43.44	0.0173	16.043	111.67	45.99	0.1627	0.286	0.012	0	1.2	0	0	0	0
methane	183.12	41.99	0.0117	16.043	111.67	45.99	0.1627	0.286	0.012	0	1.2	0	0	0	0
methane	183.12	40.16	0.0107	16.043	111.67	45.99	0.1627	0.286	0.012	0	1.2	0	0	0	0
methane	183.12	40.16	0.0107	16.043	111.67	45.99	0.1627	0.286	0.012	0	1.2	0	0	0	0
methane	183.12	39.16	0.0068	16.043	111.67	45.99	0.1627	0.286	0.012	0	1.2	0	0	0	0
methane	180	86.7	0.181	16.043	111.67	45.99	0.1627	0.286	0.012	0	1.2	0	0	0	0
methane	180	83.3	0.1517	16.043	111.67	45.99	0.1627	0.286	0.012	0	1.2	0	0	0	0
methane	180	77.7	0.1241	16.043	111.67	45.99	0.1627	0.286	0.012	0	1.2	0	0	0	0
methane	180	72.1	0.1023	16.043	111.67	45.99	0.1627	0.286	0.012	0	1.2	0	0	0	0
methane	180	67.3	0.0873	16.043	111.67	45.99	0.1627	0.286	0.012	0	1.2	0	0	0	0
methane	180	61.9	0.07	16.043	111.67	45.99	0.1627	0.286	0.012	0	1.2	0	0	0	0
methane	180	58	0.0589	16.043	111.67	45.99	0.1627	0.286	0.012	0	1.2	0	0	0	0
methane	180	53	0.046	16.043	111.67	45.99	0.1627	0.286	0.012	0	1.2	0	0	0	0
methane	180	47.6	0.0332	16.043	111.67	45.99	0.1627	0.286	0.012	0	1.2	0	0	0	0
methane	173.65	108.32	0.225	16.043	111.67	45.99	0.1627	0.286	0.012	0	1.2	0	0	0	0
methane	173.65	103.35	0.205	16.043	111.67	45.99	0.1627	0.286	0.012	0	1.2	0	0	0	0
methane	173.65	100.51	0.19	16.043	111.67	45.99	0.1627	0.286	0.012	0	1.2	0	0	0	0
methane	173.65	83.8	0.131	16.043	111.67	45.99	0.1627	0.286	0.012	0	1.2	0	0	0	0
methane	173.65	81.67	0.124	16.043	111.67	45.99	0.1627	0.286	0.012	0	1.2	0	0	0	0
methane	173.65	71.03	0.0938	16.043	111.67	45.99	0.1627	0.286	0.012	0	1.2	0	0	0	0
methane	173.65	60.69	0.0709	16.043	111.67	45.99	0.1627	0.286	0.012	0	1.2	0	0	0	0
methane	173.65	40.63	0.0257	16.043	111.67	45.99	0.1627	0.286	0.012	0	1.2	0	0	0	0
methane	173.65	35.67	0.0168	16.043	111.67	45.99	0.1627	0.286	0.012	0	1.2	0	0	0	0
methane	173.25	114.83	0.2623	16.043	111.67	45.99	0.1627	0.286	0.012	0	1.2	0	0	0	0
methane	173.25	114	0.2487	16.043	111.67	45.99	0.1627	0.286	0.012	0	1.2	0	0	0	0
methane	173.25	110.32	0.2272	16.043	111.67	45.99	0.1627	0.286	0.012	0	1.2	0	0	0	0
methane	173.25	103.42	0.1941	16.043	111.67	45.99	0.1627	0.286	0.012	0	1.2	0	0	0	0
methane	173.25	97.56	0.1685	16.043	111.67	45.99	0.1627	0.286	0.012	0	1.2	0	0	0	0
methane	173.25	83.74	0.1358	16.043	111.67	45.99	0.1627	0.286	0.012	0	1.2	0	0	0	0
methane	173.25	69.95	0.0973	16.043	111.67	45.99	0.1627	0.286	0.012	0	1.2	0	0	0	0
methane	173.25	62.05	0.0745	16.043	111.67	45.99	0.1627	0.286	0.012	0	1.2	0	0	0	0
methane	173.25	55.33	0.059	16.043	111.67	45.99	0.1627	0.286	0.012	0	1.2	0	0	0	0
methane	173.25	49.06	0.0442	16.043	111.67	45.99	0.1627	0.286	0.012	0	1.2	0	0	0	0
methane	173.25	42.37	0.0327	16.043	111.67	45.99	0.1627	0.286	0.012	0	1.2	0	0	0	0
methane	173.25	36.44	0.0196	16.043	111.67	45.99	0.1627	0.286	0.012	0	1.2	0	0	0	0
methane	173.25	30.64	0.0087	16.043	111.67	45.99	0.1627	0.286	0.012	0	1.2	0	0	0	0
methane	172.05	103.55	0.201	16.043	111.67	45.99	0.1627	0.286	0.012	0	1.2	0	0	0	0
methane	172.05	87.54	0.136	16.043	111.67	45.99	0.1627	0.286	0.012	0	1.2	0	0	0	0
methane	172.04	103.42	0.1622	16.043	111.67	45.99	0.1627	0.286	0.012	0	1.2	0	0	0	0
methane	172.04	88.25	0.1255	16.043	111.67	45.99	0.1627	0.286	0.012	0	1.2	0	0	0	0
methane	172.04	68.95	0.0877	16.043	111.67	45.99	0.1627	0.286	0.012	0	1.2	0	0	0	0
methane	172.04	34.47	0.017	16.043	111.67	45.99	0.1627	0.286	0.012	0	1.2	0	0	0	0
methane	170	128.2	0.2933	16.043	111.67	45.99	0.1627	0.286	0.012	0	1.2	0	0	0	0
methane	170	125.8	0.2702	16.043	111.67	45.99	0.1627	0.286	0.012	0	1.2	0	0	0	0
methane	170	117.9	0.2275	16.043	111.67	45.99	0.1627	0.286	0.012	0	1.2	0	0	0	0
methane	170	111.4	0.2066	16.043	111.67	45.99	0.1627	0.286	0.012	0	1.2	0	0	0	0
methane	170	97.8	0.1617	16.043	111.67	45.99	0.1627	0.286	0.012	0	1.2	0	0	0	0
methane	170	85.6	0.1307	16.043	111.67	45.99	0.1627	0.286	0.012	0	1.2	0	0	0	0
methane	170	71	0.0949	16.043	111.67	45.99	0.1627	0.286	0.012	0	1.2	0	0	0	0
methane	170	57.6	0.0662	16.043	111.67	45.99	0.1627	0.286	0.012	0	1.2	0	0	0	0
methane	170	44.4	0.0405	16.043	111.67	45.99	0.1627	0.286	0.012	0	1.2	0	0	0	0
methane	170	37.4	0.0271	16.043	111.67	45.99	0.1627	0.286	0.012	0	1.2	0	0	0	0
methane	163.17	159.58	0.38	16.043	111.67	45.99	0.1627	0.286	0.012	0	1.2	0	0	0	0
methane	163.17	158.89	0.3661	16.043	111.67	45.99	0.1627	0.286	0.012	0	1.2	0	0	0	0
methane	163.17	155.44	0.3283	16.043	111.67	45.99	0.1627	0.286	0.012	0	1.2	0	0	0	0
methane	163.17	151.99	0.3095	16.043	111.67	45.99	0.1627	0.286	0.012	0	1.2	0	0	0	0
methane	163.17	138.2	0.2506	16.043	111.67	45.99	0.1627	0.286	0.012	0	1.2	0	0	0	0
methane	163.17	125.11	0.2155	16.043	111.67	45.99	0.1627	0.286	0.012	0	1.2	0	0	0	0
methane	163.17	111.32	0.1802	16.043	111.67	45.99	0.1627	0.286	0.012	0	1.2	0	0	0	0
methane	163.17	97.53	0.1495	16.043	111.67	45.99	0.1627	0.286	0.012	0	1.2	0	0	0	0
methane	163.17	83.74	0.1222	16.043	111.67	45.99	0.1627	0.286	0.012	0	1.2	0	0	0	0
methane	163.17	69.95	0.097	16.043	111.67	45.99	0.1627	0.286	0.012	0	1.2	0	0	0	0
methane	163.17	56.16	0.0688	16.043	111.67	45.99	0.1627	0.286	0.012	0	1.2	0	0	0	0
methane	163.17	40.4	0.0403	16.043	111.67	45.99	0.1627	0.286	0.012	0	1.2	0	0	0	0
methane	163.17	28.72	0.0188	16.043	111.67	45.99	0.1627	0.286	0.012	0	1.2	0	0	0	0
methane	163.17	24.44	0.0111	16.043	111.67	45.99	0.1627	0.286	0.012	0	1.2	0	0	0	0
methane	163.17	21.68	0.0063	16.043	111.67	45.99	0.1627	0.286	0.012	0	1.2	0	0	0	0
methane	159.2	173.2	0.3629	16.043	111.67	45.99	0.1627	0.286	0.012	0	1.2	0	0	0	0
methane	159.2	166.4	0.3238	16.043	111.67	45.99	0.1627	0.286	0.012	0	1.2	0	0	0	0
methane	159.2	160.6	0.3006	16.043	111.67	45.99	0.1627	0.286	0.012	0	1.2	0	0	0	0
methane	159.2	152.7	0.2725	16.043	111.67	45.99	0.1627	0.286	0.012	0	1.2	0	0	0	0
methane	159.2	140.3	0.2364	16.043	111.67	45.99	0.1627	0.286	0.012	0	1.2	0	0	0	0
methane	159.2	127.9	0.2059	16.043	111.67	45.99	0.1627	0.286	0.012	0	1.2	0	0	0	0
methane	159.2	117.5	0.1838	16.043	111.67	45.99	0.1627	0.286	0.012	0	1.2	0	0	0	0
methane	159.2	104.3	0.1569	16.043	111.67	45.99	0.1627	0.286	0.012	0	1.2	0	0	0	0
methane	159.2	87.1	0.1231	16.043	111.67	45.99	0.1627	0.286	0.012	0	1.2	0	0	0	0
methane	159.2	62.6	0.0793	16.043	111.67	45.99	0.1627	0.286	0.012	0	1.2	0	0	0	0
methane	159.2	50.7	0.0582	16.043	111.67	45.99	0.1627	0.286	0.012	0	1.2	0	0	0	0
methane	159.2	36.8	0.0355	16.043	111.67	45.99	0.1627	0.286	0.012	0	1.2	0	0	0	0
methane	159.2	28.4	0.0204	16.043	111.67	45.99	0.1627	0.286	0.012	0	1.2	0	0	0	0
methane	159.2	24.3	0.0146	16.043	111.67	45.99	0.1627	0.286	0.012	0	1.2	0	0	0	0
methane	153.21	207.19	0.4434	16.043	111.67	45.99	0.1627	0.286	0.012	0	1.2	0	0	0	0
methane	153.21	205.12	0.4131	16.043	111.67	45.99	0.1627	0.286	0.012	0	1.2	0	0	0	0
methane	153.21	202.71	0.3964	16.043	111.67	45.99	0.1627	0.286	0.012	0	1.2	0	0	0	0
methane	153.21	198.91	0.3773	16.043	111.67	45.99	0.1627	0.286	0.012	0	1.2	0	0	0	0
methane	153.21	190.99	0.3385	16.043	111.67	45.99	0.1627	0.286	0.012	0	1.2	0	0	0	0
methane	153.21	172.37	0.2843	16.043	111.67	45.99	0.1627	0.286	0.012	0	1.2	0	0	0	0
methane	153.21	155.13	0.2425	16.043	111.67	45.99	0.1627	0.286	0.012	0	1.2	0	0	0	0
methane	153.21	137.89	0.2071	16.043	111.67	45.99	0.1627	0.286	0.012	0	1.2	0	0	0	0
methane	153.21	117.21	0.1674	16.043	111.67	45.99	0.1627	0.286	0.012	0	1.2	0	0	0	0
methane	153.21	103.42	0.1417	16.043	111.67	45.99	0.1627	0.286	0.012	0	1.2	0	0	0	0
methane	153.21	89.63	0.1202	16.043	111.67	45.99	0.1627	0.286	0.012	0	1.2	0	0	0	0
methane	153.21	82.74	0.1067	16.043	111.67	45.99	0.1627	0.286	0.012	0	1.2	0	0	0	0
methane	153.21	75.91	0.0974	16.043	111.67	45.99	0.1627	0.286	0.012	0	1.2	0	0	0	0
methane	153.21	63.74	0.0795	16.043	111.67	45.99	0.1627	0.286	0.012	0	1.2	0	0	0	0
methane	153.21	62.05	0.0744	16.043	111.67	45.99	0.1627	0.286	0.012	0	1.2	0	0	0	0
methane	153.21	52.37	0.0622	16.043	111.67	45.99	0.1627	0.286	0.012	0	1.2	0	0	0	0
methane	153.21	41.37	0.0443	16.043	111.67	45.99	0.1627	0.286	0.012	0	1.2	0	0	0	0
methane	153.21	41.37	0.0446	16.043	111.67	45.99	0.1627	0.286	0.012	0	1.2	0	0	0	0
methane	153.21	36.16	0.0357	16.043	111.67	45.99	0.1627	0.286	0.012	0	1.2	0	0	0	0
methane	150	224.1	0.4708	16.043	111.67	45.99	0.1627	0.286	0.012	0	1.2	0	0	0	0
methane	150	215.9	0.3985	16.043	111.67	45.99	0.1627	0.286	0.012	0	1.2	0	0	0	0
methane	150	209	0.3695	16.043	111.67	45.99	0.1627	0.286	0.012	0	1.2	0	0	0	0
methane	150	202.1	0.3449	16.043	111.67	45.99	0.1627	0.286	0.012	0	1.2	0	0	0	0
methane	150	177.7	0.2782	16.043	111.67	45.99	0.1627	0.286	0.012	0	1.2	0	0	0	0
methane	150	153.8	0.2305	16.043	111.67	45.99	0.1627	0.286	0.012	0	1.2	0	0	0	0
methane	150	125.2	0.1784	16.043	111.67	45.99	0.1627	0.286	0.012	0	1.2	0	0	0	0
methane	150	97	0.1311	16.043	111.67	45.99	0.1627	0.286	0.012	0	1.2	0	0	0	0
methane	150	84.7	0.1102	16.043	111.67	45.99	0.1627	0.286	0.012	0	1.2	0	0	0	0
methane	150	70.1	0.0871	16.043	111.67	45.99	0.1627	0.286	0.012	0	1.2	0	0	0	0
methane	150	55.8	0.0657	16.043	111.67	45.99	0.1627	0.286	0.012	0	1.2	0	0	0	0
methane	150	42.6	0.0468	16.043	111.67	45.99	0.1627	0.286	0.012	0	1.2	0	0	0	0
methane	150	32.2	0.0325	16.043	111.67	45.99	0.1627	0.286	0.012	0	1.2	0	0	0	0
methane	150	15.5	0.0089	16.043	111.67	45.99	0.1627	0.286	0.012	0	1.2	0	0	0	0
methane	144.26	206.84	0.3499	16.043	111.67	45.99	0.1627	0.286	0.012	0	1.2	0	0	0	0
methane	144.26	137.21	0.1805	16.043	111.67	45.99	0.1627	0.286	0.012	0	1.2	0	0	0	0
methane	144.26	102.73	0.131	16.043	111.67	45.99	0.1627	0.286	0.012	0	1.2	0	0	0	0
methane	144.26	68.95	0.0781	16.043	111.67	45.99	0.1627	0.286	0.012	0	1.2	0	0	0	0
methane	144.26	34.47	0.0343	16.043	111.67	45.99	0.1627	0.286	0.012	0	1.2	0	0	0	0
methane	143.48	263.03	0.4892	16.043	111.67	45.99	0.1627	0.286	0.012	0	1.2	0	0	0	0
methane	143.48	258.65	0.4608	16.043	111.67	45.99	0.1627	0.286	0.012	0	1.2	0	0	0	0
methane	143.48	241.32	0.3788	16.043	111.67	45.99	0.1627	0.286	0.012	0	1.2	0	0	0	0
methane	143.48	224.08	0.3327	16.043	111.67	45.99	0.1627	0.286	0.012	0	1.2	0	0	0	0
methane	143.48	206.84	0.2983	16.043	111.67	45.99	0.1627	0.286	0.012	0	1.2	0	0	0	0
methane	143.48	172.37	0.2366	16.043	111.67	45.99	0.1627	0.286	0.012	0	1.2	0	0	0	0
methane	143.48	137.89	0.1794	16.043	111.67	45.99	0.1627	0.286	0.012	0	1.2	0	0	0	0
methane	143.48	103.42	0.1283	16.043	111.67	45.99	0.1627	0.286	0.012	0	1.2	0	0	0	0
methane	143.48	86.18	0.1067	16.043	111.67	45.99	0.1627	0.286	0.012	0	1.2	0	0	0	0
methane	143.48	82.74	0.1019	16.043	111.67	45.99	0.1627	0.286	0.012	0	1.2	0	0	0	0
methane	143.48	68.91	0.0842	16.043	111.67	45.99	0.1627	0.286	0.012	0	1.2	0	0	0	0
methane	143.48	55.26	0.0657	16.043	111.67	45.99	0.1627	0.286	0.012	0	1.2	0	0	0	0
methane	143.48	41.54	0.0461	16.043	111.67	45.99	0.1627	0.286	0.012	0	1.2	0	0	0	0
methane	143.48	34.51	0.0366	16.043	111.67	45.99	0.1627	0.286	0.012	0	1.2	0	0	0	0
methane	143.48	13.86	0.0079	16.043	111.67	45.99	0.1627	0.286	0.012	0	1.2	0	0	0	0
methane	143.05	101.53	0.127	16.043	111.67	45.99	0.1627	0.286	0.012	0	1.2	0	0	0	0
methane	143.05	79.74	0.0992	16.043	111.67	45.99	0.1627	0.286	0.012	0	1.2	0	0	0	0
methane	143.05	59.88	0.0684	16.043	111.67	45.99	0.1627	0.286	0.012	0	1.2	0	0	0	0
methane	143.05	40.73	0.0477	16.043	111.67	45.99	0.1627	0.286	0.012	0	1.2	0	0	0	0
methane	143.05	20.16	0.0168	16.043	111.67	45.99	0.1627	0.286	0.012	0	1.2	0	0	0	0
methane	143.05	10.74	0.0031	16.043	111.67	45.99	0.1627	0.286	0.012	0	1.2	0	0	0	0
methane	140	278.5	0.4751	16.043	111.67	45.99	0.1627	0.286	0.012	0	1.2	0	0	0	0
methane	140	258.3	0.3923	16.043	111.67	45.99	0.1627	0.286	0.012	0	1.2	0	0	0	0
methane	140	229.5	0.3242	16.043	111.67	45.99	0.1627	0.286	0.012	0	1.2	0	0	0	0
methane	140	211.7	0.2912	16.043	111.67	45.99	0.1627	0.286	0.012	0	1.2	0	0	0	0
methane	140	202.4	0.2746	16.043	111.67	45.99	0.1627	0.286	0.012	0	1.2	0	0	0	0
methane	140	172.8	0.2278	16.043	111.67	45.99	0.1627	0.286	0.012	0	1.2	0	0	0	0
methane	140	139	0.178	16.043	111.67	45.99	0.1627	0.286	0.012	0	1.2	0	0	0	0
methane	140	111.5	0.1386	16.043	111.67	45.99	0.1627	0.286	0.012	0	1.2	0	0	0	0
methane	140	83.3	0.0998	16.043	111.67	45.99	0.1627	0.286	0.012	0	1.2	0	0	0	0
methane	140	56.6	0.0635	16.043	111.67	45.99	0.1627	0.286	0.012	0	1.2	0	0	0	0
methane	140	42.6	0.0464	16.043	111.67	45.99	0.1627	0.286	0.012	0	1.2	0	0	0	0
methane	140	28.9	0.0285	16.043	111.67	45.99	0.1627	0.286	0.012	0	1.2	0	0	0	0
methane	140	18.5	0.0152	16.043	111.67	45.99	0.1627	0.286	0.012	0	1.2	0	0	0	0
methane	140	15.9	0.0124	16.043	111.67	45.99	0.1627	0.286	0.012	0	1.2	0	0	0	0
methane	133.14	275.8	0.3565	16.043	111.67	45.99	0.1627	0.286	0.012	0	1.2	0	0	0	0
methane	133.14	241.32	0.2959	16.043	111.67	45.99	0.1627	0.286	0.012	0	1.2	0	0	0	0
methane	133.14	207.39	0.2385	16.043	111.67	45.99	0.1627	0.286	0.012	0	1.2	0	0	0	0
methane	133.14	172.37	0.1972	16.043	111.67	45.99	0.1627	0.286	0.012	0	1.2	0	0	0	0
methane	133.14	137.55	0.1488	16.043	111.67	45.99	0.1627	0.286	0.012	0	1.2	0	0	0	0
methane	133.14	96.42	0.1068	16.043	111.67	45.99	0.1627	0.286	0.012	0	1.2	0	0	0	0
methane	133.14	69.53	0.0776	16.043	111.67	45.99	0.1627	0.286	0.012	0	1.2	0	0	0	0
methane	133.14	68.6	0.0738	16.043	111.67	45.99	0.1627	0.286	0.012	0	1.2	0	0	0	0
methane	133.14	55.19	0.0604	16.043	111.67	45.99	0.1627	0.286	0.012	0	1.2	0	0	0	0
methane	133.14	41.4	0.0436	16.043	111.67	45.99	0.1627	0.286	0.012	0	1.2	0	0	0	0
methane	133.14	35.51	0.0376	16.043	111.67	45.99	0.1627	0.286	0.012	0	1.2	0	0	0	0
methane	133.14	27.54	0.0268	16.043	111.67	45.99	0.1627	0.286	0.012	0	1.2	0	0	0	0
methane	130	276.3	0.3295	16.043	111.67	45.99	0.1627	0.286	0.012	0	1.2	0	0	0	0
methane	130	244.1	0.2834	16.043	111.67	45.99	0.1627	0.286	0.012	0	1.2	0	0	0	0
methane	130	209.7	0.2386	16.043	111.67	45.99	0.1627	0.286	0.012	0	1.2	0	0	0	0
methane	130	152.6	0.1719	16.043	111.67	45.99	0.1627	0.286	0.012	0	1.2	0	0	0	0
methane	130	124.9	0.1394	16.043	111.67	45.99	0.1627	0.286	0.012	0	1.2	0	0	0	0
methane	130	97.5	0.107	16.043	111.67	45.99	0.1627	0.286	0.012	0	1.2	0	0	0	0
methane	130	69.9	0.0748	16.043	111.67	45.99	0.1627	0.286	0.012	0	1.2	0	0	0	0
methane	130	56.6	0.0602	16.043	111.67	45.99	0.1627	0.286	0.012	0	1.2	0	0	0	0
methane	130	42	0.0444	16.043	111.67	45.99	0.1627	0.286	0.012	0	1.2	0	0	0	0
methane	130	28.7	0.0289	16.043	111.67	45.99	0.1627	0.286	0.012	0	1.2	0	0	0	0
methane	130	21.7	0.0212	16.043	111.67	45.99	0.1627	0.286	0.012	0	1.2	0	0	0	0
methane	130	14.8	0.0139	16.043	111.67	45.99	0.1627	0.286	0.012	0	1.2	0	0	0	0
methane	130	8.1	0.0053	16.043	111.67	45.99	0.1627	0.286	0.012	0	1.2	0	0	0	0
methane	123.15	101.83	0.101	16.043	111.67	45.99	0.1627	0.286	0.012	0	1.2	0	0	0	0
methane	123.15	81.77	0.0816	16.043	111.67	45.99	0.1627	0.286	0.012	0	1.2	0	0	0	0
methane	123.15	60.59	0.0616	16.043	111.67	45.99	0.1627	0.286	0.012	0	1.2	0	0	0	0
methane	123.15	40.33	0.0385	16.043	111.67	45.99	0.1627	0.286	0.012	0	1.2	0	0	0	0
methane	123.15	20.27	0.0192	16.043	111.67	45.99	0.1627	0.286	0.012	0	1.2	0	0	0	0
methane	123.15	10.23	0.0073	16.043	111.67	45.99	0.1627	0.286	0.012	0	1.2	0	0	0	0
methane	123.05	206.15	0.2146	16.043	111.67	45.99	0.1627	0.286	0.012	0	1.2	0	0	0	0
methane	123.05	172.02	0.1724	16.043	111.67	45.99	0.1627	0.286	0.012	0	1.2	0	0	0	0
methane	123.05	138.58	0.1402	16.043	111.67	45.99	0.1627	0.286	0.012	0	1.2	0	0	0	0
methane	123.05	138.45	0.1411	16.043	111.67	45.99	0.1627	0.286	0.012	0	1.2	0	0	0	0
methane	123.05	103.42	0.1037	16.043	111.67	45.99	0.1627	0.286	0.012	0	1.2	0	0	0	0
methane	123.05	86.18	0.0841	16.043	111.67	45.99	0.1627	0.286	0.012	0	1.2	0	0	0	0
methane	123.05	68.95	0.0691	16.043	111.67	45.99	0.1627	0.286	0.012	0	1.2	0	0	0	0
methane	123.05	68.95	0.0693	16.043	111.67	45.99	0.1627	0.286	0.012	0	1.2	0	0	0	0
methane	123.05	58.95	0.0611	16.043	111.67	45.99	0.1627	0.286	0.012	0	1.2	0	0	0	0
methane	123.05	55.16	0.0554	16.043	111.67	45.99	0.1627	0.286	0.012	0	1.2	0	0	0	0
methane	123.05	45.16	0.0439	16.043	111.67	45.99	0.1627	0.286	0.012	0	1.2	0	0	0	0
methane	120	278.2	0.2693	16.043	111.67	45.99	0.1627	0.286	0.012	0	1.2	0	0	0	0
methane	120	242.1	0.2332	16.043	111.67	45.99	0.1627	0.286	0.012	0	1.2	0	0	0	0
methane	120	209.4	0.2027	16.043	111.67	45.99	0.1627	0.286	0.012	0	1.2	0	0	0	0
methane	120	175.3	0.171	16.043	111.67	45.99	0.1627	0.286	0.012	0	1.2	0	0	0	0
methane	120	139.5	0.1362	16.043	111.67	45.99	0.1627	0.286	0.012	0	1.2	0	0	0	0
methane	120	122.2	0.1204	16.043	111.67	45.99	0.1627	0.286	0.012	0	1.2	0	0	0	0
methane	120	95.4	0.0942	16.043	111.67	45.99	0.1627	0.286	0.012	0	1.2	0	0	0	0
methane	120	72	0.0702	16.043	111.67	45.99	0.1627	0.286	0.012	0	1.2	0	0	0	0
methane	120	56.5	0.0549	16.043	111.67	45.99	0.1627	0.286	0.012	0	1.2	0	0	0	0
methane	120	35.8	0.0345	16.043	111.67	45.99	0.1627	0.286	0.012	0	1.2	0	0	0	0
methane	120	21.8	0.0206	16.043	111.67	45.99	0.1627	0.286	0.012	0	1.2	0	0	0	0
methane	120	15.1	0.0138	16.043	111.67	45.99	0.1627	0.286	0.012	0	1.2	0	0	0	0
methane	120	11.3	0.0101	16.043	111.67	45.99	0.1627	0.286	0.012	0	1.2	0	0	0	0
methane	120	7.9	0.0062	16.043	111.67	45.99	0.1627	0.286	0.012	0	1.2	0	0	0	0
methane	118.19	206.84	0.1925	16.043	111.67	45.99	0.1627	0.286	0.012	0	1.2	0	0	0	0
methane	118.19	206.5	0.1941	16.043	111.67	45.99	0.1627	0.286	0.012	0	1.2	0	0	0	0
methane	118.19	172.37	0.1611	16.043	111.67	45.99	0.1627	0.286	0.012	0	1.2	0	0	0	0
methane	118.19	138.24	0.1304	16.043	111.67	45.99	0.1627	0.286	0.012	0	1.2	0	0	0	0
methane	118.19	103.42	0.0975	16.043	111.67	45.99	0.1627	0.286	0.012	0	1.2	0	0	0	0
methane	118.19	69.22	0.0662	16.043	111.67	45.99	0.1627	0.286	0.012	0	1.2	0	0	0	0
methane	118.19	55.43	0.0518	16.043	111.67	45.99	0.1627	0.286	0.012	0	1.2	0	0	0	0
methane	118.19	41.71	0.0386	16.043	111.67	45.99	0.1627	0.286	0.012	0	1.2	0	0	0	0
methane	116.48	275.79	0.317	16.043	111.67	45.99	0.1627	0.286	0.012	0	1.2	0	0	0	0
methane	116.48	158.58	0.1394	16.043	111.67	45.99	0.1627	0.286	0.012	0	1.2	0	0	0	0
methane	116.48	102.73	0.095	16.043	111.67	45.99	0.1627	0.286	0.012	0	1.2	0	0	0	0
methane	116.48	33.78	0.0318	16.043	111.67	45.99	0.1627	0.286	0.012	0	1.2	0	0	0	0
methane	113.14	284.06	0.2335	16.043	111.67	45.99	0.1627	0.286	0.012	0	1.2	0	0	0	0
methane	113.14	246.14	0.2074	16.043	111.67	45.99	0.1627	0.286	0.012	0	1.2	0	0	0	0
methane	113.14	206.84	0.1792	16.043	111.67	45.99	0.1627	0.286	0.012	0	1.2	0	0	0	0
methane	113.14	172.71	0.1485	16.043	111.67	45.99	0.1627	0.286	0.012	0	1.2	0	0	0	0
methane	113.14	137.34	0.1189	16.043	111.67	45.99	0.1627	0.286	0.012	0	1.2	0	0	0	0
methane	113.14	103.56	0.09	16.043	111.67	45.99	0.1627	0.286	0.012	0	1.2	0	0	0	0
methane	113.14	85.91	0.0752	16.043	111.67	45.99	0.1627	0.286	0.012	0	1.2	0	0	0	0
methane	113.14	69.09	0.0594	16.043	111.67	45.99	0.1627	0.286	0.012	0	1.2	0	0	0	0
methane	113.14	55.3	0.0459	16.043	111.67	45.99	0.1627	0.286	0.012	0	1.2	0	0	0	0
methane	113.14	41.64	0.0352	16.043	111.67	45.99	0.1627	0.286	0.012	0	1.2	0	0	0	0
methane	113.14	28.2	0.024	16.043	111.67	45.99	0.1627	0.286	0.012	0	1.2	0	0	0	0
methane	110	276.4	0.2164	16.043	111.67	45.99	0.1627	0.286	0.012	0	1.2	0	0	0	0
methane	110	208.6	0.1684	16.043	111.67	45.99	0.1627	0.286	0.012	0	1.2	0	0	0	0
methane	110	173.4	0.1417	16.043	111.67	45.99	0.1627	0.286	0.012	0	1.2	0	0	0	0
methane	110	139.7	0.1153	16.043	111.67	45.99	0.1627	0.286	0.012	0	1.2	0	0	0	0
methane	110	90.7	0.078	16.043	111.67	45.99	0.1627	0.286	0.012	0	1.2	0	0	0	0
methane	110	77.8	0.0672	16.043	111.67	45.99	0.1627	0.286	0.012	0	1.2	0	0	0	0
methane	110	63.7	0.0556	16.043	111.67	45.99	0.1627	0.286	0.012	0	1.2	0	0	0	0
methane	110	49.8	0.0442	16.043	111.67	45.99	0.1627	0.286	0.012	0	1.2	0	0	0	0
methane	110	35.6	0.0318	16.043	111.67	45.99	0.1627	0.286	0.012	0	1.2	0	0	0	0
methane	110	28.2	0.0252	16.043	111.67	45.99	0.1627	0.286	0.012	0	1.2	0	0	0	0
methane	110	21.8	0.0198	16.043	111.67	45.99	0.1627	0.286	0.012	0	1.2	0	0	0	0
methane	110	18.3	0.0165	16.043	111.67	45.99	0.1627	0.286	0.012	0	1.2	0	0	0	0
methane	110	14.9	0.0136	16.043	111.67	45.99	0.1627	0.286	0.012	0	1.2	0	0	0	0
methane	110	11.1	0.0096	16.043	111.67	45.99	0.1627	0.286	0.012	0	1.2	0	0	0	0
methane	110	7.8	0.0068	16.043	111.67	45.99	0.1627	0.286	0.012	0	1.2	0	0	0	0
methane	110	5.8	0.0046	16.043	111.67	45.99	0.1627	0.286	0.012	0	1.2	0	0	0	0
methane	110	4.5	0.0032	16.043	111.67	45.99	0.1627	0.286	0.012	0	1.2	0	0	0	0
methane	110	3.4	0.0021	16.043	111.67	45.99	0.1627	0.286	0.012	0	1.2	0	0	0	0
methane	108.13	204.74	0.1591	16.043	111.67	45.99	0.1627	0.286	0.012	0	1.2	0	0	0	0
methane	108.13	170.3	0.1345	16.043	111.67	45.99	0.1627	0.286	0.012	0	1.2	0	0	0	0
methane	108.13	137.89	0.1056	16.043	111.67	45.99	0.1627	0.286	0.012	0	1.2	0	0	0	0
methane	108.13	96.53	0.0762	16.043	111.67	45.99	0.1627	0.286	0.012	0	1.2	0	0	0	0
methane	108.13	85.7	0.0684	16.043	111.67	45.99	0.1627	0.286	0.012	0	1.2	0	0	0	0
methane	108.13	78.94	0.0622	16.043	111.67	45.99	0.1627	0.286	0.012	0	1.2	0	0	0	0
methane	108.13	69.29	0.0546	16.043	111.67	45.99	0.1627	0.286	0.012	0	1.2	0	0	0	0
methane	108.13	55.36	0.0435	16.043	111.67	45.99	0.1627	0.286	0.012	0	1.2	0	0	0	0
methane	108.13	41.79	0.0327	16.043	111.67	45.99	0.1627	0.286	0.012	0	1.2	0	0	0	0
methane	108.13	35.85	0.028	16.043	111.67	45.99	0.1627	0.286	0.012	0	1.2	0	0	0	0
methane	103.15	91.19	0.0819	16.043	111.67	45.99	0.1627	0.286	0.012	0	1.2	0	0	0	0
methane	103.15	81.97	0.0708	16.043	111.67	45.99	0.1627	0.286	0.012	0	1.2	0	0	0	0
methane	103.15	61.2	0.0569	16.043	111.67	45.99	0.1627	0.286	0.012	0	1.2	0	0	0	0
methane	103.15	41.34	0.0337	16.043	111.67	45.99	0.1627	0.286	0.012	0	1.2	0	0	0	0
methane	103.15	19.96	0.0142	16.043	111.67	45.99	0.1627	0.286	0.012	0	1.2	0	0	0	0
methane	100	277.1	0.1755	16.043	111.67	45.99	0.1627	0.286	0.012	0	1.2	0	0	0	0
methane	100	243.5	0.1579	16.043	111.67	45.99	0.1627	0.286	0.012	0	1.2	0	0	0	0
methane	100	209.1	0.1396	16.043	111.67	45.99	0.1627	0.286	0.012	0	1.2	0	0	0	0
methane	100	173.2	0.1162	16.043	111.67	45.99	0.1627	0.286	0.012	0	1.2	0	0	0	0
methane	100	139.4	0.0965	16.043	111.67	45.99	0.1627	0.286	0.012	0	1.2	0	0	0	0
methane	100	104.2	0.0753	16.043	111.67	45.99	0.1627	0.286	0.012	0	1.2	0	0	0	0
methane	100	70.4	0.053	16.043	111.67	45.99	0.1627	0.286	0.012	0	1.2	0	0	0	0
methane	100	56.3	0.0436	16.043	111.67	45.99	0.1627	0.286	0.012	0	1.2	0	0	0	0
methane	100	49.2	0.0388	16.043	111.67	45.99	0.1627	0.286	0.012	0	1.2	0	0	0	0
methane	100	42.3	0.0331	16.043	111.67	45.99	0.1627	0.286	0.012	0	1.2	0	0	0	0
methane	100	35.6	0.0283	16.043	111.67	45.99	0.1627	0.286	0.012	0	1.2	0	0	0	0
methane	100	28.6	0.023	16.043	111.67	45.99	0.1627	0.286	0.012	0	1.2	0	0	0	0
methane	100	19.6	0.0163	16.043	111.67	45.99	0.1627	0.286	0.012	0	1.2	0	0	0	0
methane	100	16.7	0.014	16.043	111.67	45.99	0.1627	0.286	0.012	0	1.2	0	0	0	0
methane	100	14	0.0116	16.043	111.67	45.99	0.1627	0.286	0.012	0	1.2	0	0	0	0
methane	100	11.2	0.0094	16.043	111.67	45.99	0.1627	0.286	0.012	0	1.2	0	0	0	0
methane	100	7.7	0.0063	16.043	111.67	45.99	0.1627	0.286	0.012	0	1.2	0	0	0	0
methane	100	6.7	0.0055	16.043	111.67	45.99	0.1627	0.286	0.012	0	1.2	0	0	0	0
methane	100	6	0.005	16.043	111.67	45.99	0.1627	0.286	0.012	0	1.2	0	0	0	0
methane	100	5.1	0.0041	16.043	111.67	45.99	0.1627	0.286	0.012	0	1.2	0	0	0	0
methane	92.3	278.7	0.1416	16.043	111.67	45.99	0.1627	0.286	0.012	0	1.2	0	0	0	0
methane	92.3	208.3	0.1134	16.043	111.67	45.99	0.1627	0.286	0.012	0	1.2	0	0	0	0
methane	92.3	174.7	0.0988	16.043	111.67	45.99	0.1627	0.286	0.012	0	1.2	0	0	0	0
methane	92.3	139.1	0.0826	16.043	111.67	45.99	0.1627	0.286	0.012	0	1.2	0	0	0	0
methane	92.3	104.2	0.0647	16.043	111.67	45.99	0.1627	0.286	0.012	0	1.2	0	0	0	0
methane	92.3	70.2	0.0461	16.043	111.67	45.99	0.1627	0.286	0.012	0	1.2	0	0	0	0
methane	92.3	56.3	0.0382	16.043	111.67	45.99	0.1627	0.286	0.012	0	1.2	0	0	0	0
methane	92.3	42.2	0.0293	16.043	111.67	45.99	0.1627	0.286	0.012	0	1.2	0	0	0	0
methane	92.3	35.6	0.0251	16.043	111.67	45.99	0.1627	0.286	0.012	0	1.2	0	0	0	0
methane	92.3	28.7	0.0209	16.043	111.67	45.99	0.1627	0.286	0.012	0	1.2	0	0	0	0
methane	92.3	21.8	0.0163	16.043	111.67	45.99	0.1627	0.286	0.012	0	1.2	0	0	0	0
methane	92.3	18.3	0.014	16.043	111.67	45.99	0.1627	0.286	0.012	0	1.2	0	0	0	0
methane	92.3	14.8	0.0113	16.043	111.67	45.99	0.1627	0.286	0.012	0	1.2	0	0	0	0
methane	92.3	11.4	0.0085	16.043	111.67	45.99	0.1627	0.286	0.012	0	1.2	0	0	0	0
methane	92.3	7.9	0.006	16.043	111.67	45.99	0.1627	0.286	0.012	0	1.2	0	0	0	0
methane	92.3	6.5	0.005	16.043	111.67	45.99	0.1627	0.286	0.012	0	1.2	0	0	0	0
methane	92.3	5.9	0.0044	16.043	111.67	45.99	0.1627	0.286	0.012	0	1.2	0	0	0	0
methane	92.3	5.2	0.004	16.043	111.67	45.99	0.1627	0.286	0.012	0	1.2	0	0	0	0
methane	92.3	4.5	0.0035	16.043	111.67	45.99	0.1627	0.286	0.012	0	1.2	0	0	0	0
methane	92.3	3.8	0.0031	16.043	111.67	45.99	0.1627	0.286	0.012	0	1.2	0	0	0	0
methane	92.3	3.1	0.0023	16.043	111.67	45.99	0.1627	0.286	0.012	0	1.2	0	0	0	0
methane	92.3	2.2	0.0018	16.043	111.67	45.99	0.1627	0.286	0.012	0	1.2	0	0	0	0
methanol	476.6	109.8	0.0525	32.042	337.8	80.97	0.2715	0.224	0.564	1	22.63	0.893946	0	0	0
methanol	475.3	104.4	0.0498	32.042	337.8	80.97	0.2715	0.224	0.564	1	22.63	0.893946	0	0	0
methanol	460.7	96.8	0.0431	32.042	337.8	80.97	0.2715	0.224	0.564	1	22.63	0.893946	0	0	0
methanol	458.9	91.1	0.0412	32.042	337.8	80.97	0.2715	0.224	0.564	1	22.63	0.893946	0	0	0
methanol	450.8	88.9	0.0388	32.042	337.8	80.97	0.2715	0.224	0.564	1	22.63	0.893946	0	0	0
methanol	448.6	83.8	0.0371	32.042	337.8	80.97	0.2715	0.224	0.564	1	22.63	0.893946	0	0	0
methanol	438.9	78.1	0.0339	32.042	337.8	80.97	0.2715	0.224	0.564	1	22.63	0.893946	0	0	0
methanol	437.5	80.3	0.0341	32.042	337.8	80.97	0.2715	0.224	0.564	1	22.63	0.893946	0	0	0
methanol	425.3	72	0.0298	32.042	337.8	80.97	0.2715	0.224	0.564	1	22.63	0.893946	0	0	0
methanol	424.6	74.5	0.0302	32.042	337.8	80.97	0.2715	0.224	0.564	1	22.63	0.893946	0	0	0
methanol	415.2	68.6	0.0281	32.042	337.8	80.97	0.2715	0.224	0.564	1	22.63	0.893946	0	0	0
methanol	414.5	67.3	0.0271	32.042	337.8	80.97	0.2715	0.224	0.564	1	22.63	0.893946	0	0	0
methanol	413.45	10.71	0.00634	32.042	337.8	80.97	0.2715	0.224	0.564	1	22.63	0.893946	0	0	0
methanol	402.25	11.86	0.00437	32.042	337.8	80.97	0.2715	0.224	0.564	1	22.63	0.893946	0	0	0
methanol	400.7	64.4	0.0245	32.042	337.8	80.97	0.2715	0.224	0.564	1	22.63	0.893946	0	0	0
methanol	395.8	60	0.0233	32.042	337.8	80.97	0.2715	0.224	0.564	1	22.63	0.893946	0	0	0
methanol	392.85	11.91	0.00376	32.042	337.8	80.97	0.2715	0.224	0.564	1	22.63	0.893946	0	0	0
methanol	385.4	58.3	0.0219	32.042	337.8	80.97	0.2715	0.224	0.564	1	22.63	0.893946	0	0	0
methanol	382.95	11.41	0.00374	32.042	337.8	80.97	0.2715	0.224	0.564	1	22.63	0.893946	0	0	0
methanol	374.2	53.9	0.0195	32.042	337.8	80.97	0.2715	0.224	0.564	1	22.63	0.893946	0	0	0
methanol	374.05	16.59	0.00433	32.042	337.8	80.97	0.2715	0.224	0.564	1	22.63	0.893946	0	0	0
methanol	374.05	11.42	0.00327	32.042	337.8	80.97	0.2715	0.224	0.564	1	22.63	0.893946	0	0	0
methanol	373.95	5.96	0.00219	32.042	337.8	80.97	0.2715	0.224	0.564	1	22.63	0.893946	0	0	0
methanol	373.9	55	0.0201	32.042	337.8	80.97	0.2715	0.224	0.564	1	22.63	0.893946	0	0	0
methanol	373.15	253	0.05542	32.042	337.8	80.97	0.2715	0.224	0.564	1	22.63	0.893946	0	0	0
methanol	373.15	189.5	0.04228	32.042	337.8	80.97	0.2715	0.224	0.564	1	22.63	0.893946	0	0	0
methanol	373.15	128	0.0285	32.042	337.8	80.97	0.2715	0.224	0.564	1	22.63	0.893946	0	0	0
methanol	373.15	95.3	0.02126	32.042	337.8	80.97	0.2715	0.224	0.564	1	22.63	0.893946	0	0	0
methanol	373.15	64.8	0.01429	32.042	337.8	80.97	0.2715	0.224	0.564	1	22.63	0.893946	0	0	0
methanol	373.15	34.4	0.0072	32.042	337.8	80.97	0.2715	0.224	0.564	1	22.63	0.893946	0	0	0
methanol	372.5	54.3	0.02	32.042	337.8	80.97	0.2715	0.224	0.564	1	22.63	0.893946	0	0	0
methanol	363.55	11.36	0.00274	32.042	337.8	80.97	0.2715	0.224	0.564	1	22.63	0.893946	0	0	0
methanol	363.55	5.94	0.00188	32.042	337.8	80.97	0.2715	0.224	0.564	1	22.63	0.893946	0	0	0
methanol	363.45	16.28	0.00378	32.042	337.8	80.97	0.2715	0.224	0.564	1	22.63	0.893946	0	0	0
methanol	358.5	50	0.0174	32.042	337.8	80.97	0.2715	0.224	0.564	1	22.63	0.893946	0	0	0
methanol	354.15	5.86	0.00167	32.042	337.8	80.97	0.2715	0.224	0.564	1	22.63	0.893946	0	0	0
methanol	353.15	10.89	0.00262	32.042	337.8	80.97	0.2715	0.224	0.564	1	22.63	0.893946	0	0	0
methanol	353.05	15.42	0.00375	32.042	337.8	80.97	0.2715	0.224	0.564	1	22.63	0.893946	0	0	0
methanol	348.2	47.8	0.0161	32.042	337.8	80.97	0.2715	0.224	0.564	1	22.63	0.893946	0	0	0
methanol	348.15	122.6	0.0256	32.042	337.8	80.97	0.2715	0.224	0.564	1	22.63	0.893946	0	0	0
methanol	348.15	85.11	0.0184	32.042	337.8	80.97	0.2715	0.224	0.564	1	22.63	0.893946	0	0	0
methanol	347.6	50	0.0158	32.042	337.8	80.97	0.2715	0.224	0.564	1	22.63	0.893946	0	0	0
methanol	344.95	5.82	0.00142	32.042	337.8	80.97	0.2715	0.224	0.564	1	22.63	0.893946	0	0	0
methanol	343.45	15.18	0.0034	32.042	337.8	80.97	0.2715	0.224	0.564	1	22.63	0.893946	0	0	0
methanol	342.45	10.56	0.00235	32.042	337.8	80.97	0.2715	0.224	0.564	1	22.63	0.893946	0	0	0
methanol	335.15	5.67	0.00134	32.042	337.8	80.97	0.2715	0.224	0.564	1	22.63	0.893946	0	0	0
methanol	333.65	14.68	0.00308	32.042	337.8	80.97	0.2715	0.224	0.564	1	22.63	0.893946	0	0	0
methanol	333.05	10.24	0.00215	32.042	337.8	80.97	0.2715	0.224	0.564	1	22.63	0.893946	0	0	0
methanol	324.7	45.6	0.012	32.042	337.8	80.97	0.2715	0.224	0.564	1	22.63	0.893946	0	0	0
methanol	323.8	47.8	0.0116	32.042	337.8	80.97	0.2715	0.224	0.564	1	22.63	0.893946	0	0	0
methanol	323.45	14.25	0.00285	32.042	337.8	80.97	0.2715	0.224	0.564	1	22.63	0.893946	0	0	0
methanol	323.25	5.5	0.00113	32.042	337.8	80.97	0.2715	0.224	0.564	1	22.63	0.893946	0	0	0
methanol	323.15	266	0.04484	32.042	337.8	80.97	0.2715	0.224	0.564	1	22.63	0.893946	0	0	0
methanol	323.15	177	0.03056	32.042	337.8	80.97	0.2715	0.224	0.564	1	22.63	0.893946	0	0	0
methanol	323.15	86.4	0.01519	32.042	337.8	80.97	0.2715	0.224	0.564	1	22.63	0.893946	0	0	0
methanol	323.15	61.2	0.01073	32.042	337.8	80.97	0.2715	0.224	0.564	1	22.63	0.893946	0	0	0
methanol	323.15	44	0.00773	32.042	337.8	80.97	0.2715	0.224	0.564	1	22.63	0.893946	0	0	0
methanol	322.85	9.96	0.00193	32.042	337.8	80.97	0.2715	0.224	0.564	1	22.63	0.893946	0	0	0
methanol	314.4	44.9	0.0102	32.042	337.8	80.97	0.2715	0.224	0.564	1	22.63	0.893946	0	0	0
methanol	314.25	14.07	0.00249	32.042	337.8	80.97	0.2715	0.224	0.564	1	22.63	0.893946	0	0	0
methanol	313.95	5.36	0.00103	32.042	337.8	80.97	0.2715	0.224	0.564	1	22.63	0.893946	0	0	0
methanol	313.35	9.67	0.00175	32.042	337.8	80.97	0.2715	0.224	0.564	1	22.63	0.893946	0	0	0
methanol	308.2	34.27	0.00619	32.042	337.8	80.97	0.2715	0.224	0.564	1	22.63	0.893946	0	0	0
methanol	308.2	26.35	0.00484	32.042	337.8	80.97	0.2715	0.224	0.564	1	22.63	0.893946	0	0	0
methanol	308.2	13.83	0.0026	32.042	337.8	80.97	0.2715	0.224	0.564	1	22.63	0.893946	0	0	0
methanol	308.2	7.52	0.00134	32.042	337.8	80.97	0.2715	0.224	0.564	1	22.63	0.893946	0	0	0
methanol	308.15	110	0.0211	32.042	337.8	80.97	0.2715	0.224	0.564	1	22.63	0.893946	0	0	0
methanol	308.15	90	0.0173	32.042	337.8	80.97	0.2715	0.224	0.564	1	22.63	0.893946	0	0	0
methanol	308.15	70	0.0135	32.042	337.8	80.97	0.2715	0.224	0.564	1	22.63	0.893946	0	0	0
methanol	308.15	50	0.01	32.042	337.8	80.97	0.2715	0.224	0.564	1	22.63	0.893946	0	0	0
methanol	308.15	30	0.0067	32.042	337.8	80.97	0.2715	0.224	0.564	1	22.63	0.893946	0	0	0
methanol	308.15	20	0.0037	32.042	337.8	80.97	0.2715	0.224	0.564	1	22.63	0.893946	0	0	0
methanol	303.95	9.36	0.00159	32.042	337.8	80.97	0.2715	0.224	0.564	1	22.63	0.893946	0	0	0
methanol	303.65	5.17	0.00092	32.042	337.8	80.97	0.2715	0.224	0.564	1	22.63	0.893946	0	0	0
methanol	302.15	13.26	0.00219	32.042	337.8	80.97	0.2715	0.224	0.564	1	22.63	0.893946	0	0	0
methanol	299.65	13.37	0.00212	32.042	337.8	80.97	0.2715	0.224	0.564	1	22.63	0.893946	0	0	0
methanol	298.15	212.5	0.032	32.042	337.8	80.97	0.2715	0.224	0.564	1	22.63	0.893946	0	0	0
methanol	298.15	166	0.1007	32.042	337.8	80.97	0.2715	0.224	0.564	1	22.63	0.893946	0	0	0
methanol	298.15	110.1	0.0203	32.042	337.8	80.97	0.2715	0.224	0.564	1	22.63	0.893946	0	0	0
methanol	298.15	104.5	0.01637	32.042	337.8	80.97	0.2715	0.224	0.564	1	22.63	0.893946	0	0	0
methanol	298.15	90	0.0163	32.042	337.8	80.97	0.2715	0.224	0.564	1	22.63	0.893946	0	0	0
methanol	298.15	69.93	0.0134	32.042	337.8	80.97	0.2715	0.224	0.564	1	22.63	0.893946	0	0	0
methanol	298.15	50.8	0.00809	32.042	337.8	80.97	0.2715	0.224	0.564	1	22.63	0.893946	0	0	0
methanol	298.15	50.14	0.0101	32.042	337.8	80.97	0.2715	0.224	0.564	1	22.63	0.893946	0	0	0
methanol	298.15	30	0.0067	32.042	337.8	80.97	0.2715	0.224	0.564	1	22.63	0.893946	0	0	0
methanol	298.15	20	0.0035	32.042	337.8	80.97	0.2715	0.224	0.564	1	22.63	0.893946	0	0	0
methanol	297.55	151.99	0.0253	32.042	337.8	80.97	0.2715	0.224	0.564	1	22.63	0.893946	0	0	0
methanol	296.35	9.15	0.0015	32.042	337.8	80.97	0.2715	0.224	0.564	1	22.63	0.893946	0	0	0
methanol	296.25	5.06	0.00079	32.042	337.8	80.97	0.2715	0.224	0.564	1	22.63	0.893946	0	0	0
methanol	291.2	31.04	0.00477	32.042	337.8	80.97	0.2715	0.224	0.564	1	22.63	0.893946	0	0	0
methanol	291.2	25.14	0.00375	32.042	337.8	80.97	0.2715	0.224	0.564	1	22.63	0.893946	0	0	0
methanol	291.2	12.92	0.00196	32.042	337.8	80.97	0.2715	0.224	0.564	1	22.63	0.893946	0	0	0
methanol	291.2	4.33	0.0007	32.042	337.8	80.97	0.2715	0.224	0.564	1	22.63	0.893946	0	0	0
methanol	291	48.5	0.0055	32.042	337.8	80.97	0.2715	0.224	0.564	1	22.63	0.893946	0	0	0
methanol	291	45.5	0.0052	32.042	337.8	80.97	0.2715	0.224	0.564	1	22.63	0.893946	0	0	0
methanol	291	43.2	0.0049	32.042	337.8	80.97	0.2715	0.224	0.564	1	22.63	0.893946	0	0	0
methanol	291	36.2	0.0061	32.042	337.8	80.97	0.2715	0.224	0.564	1	22.63	0.893946	0	0	0
methanol	291	33.1	0.0038	32.042	337.8	80.97	0.2715	0.224	0.564	1	22.63	0.893946	0	0	0
methanol	291	31	0.0052	32.042	337.8	80.97	0.2715	0.224	0.564	1	22.63	0.893946	0	0	0
methanol	291	27.9	0.0032	32.042	337.8	80.97	0.2715	0.224	0.564	1	22.63	0.893946	0	0	0
methanol	291	27.1	0.0031	32.042	337.8	80.97	0.2715	0.224	0.564	1	22.63	0.893946	0	0	0
methanol	291	26.1	0.0045	32.042	337.8	80.97	0.2715	0.224	0.564	1	22.63	0.893946	0	0	0
methanol	291	26	0.0044	32.042	337.8	80.97	0.2715	0.224	0.564	1	22.63	0.893946	0	0	0
methanol	291	21.9	0.0037	32.042	337.8	80.97	0.2715	0.224	0.564	1	22.63	0.893946	0	0	0
methanol	291	20.8	0.0035	32.042	337.8	80.97	0.2715	0.224	0.564	1	22.63	0.893946	0	0	0
methanol	291	18.1	0.0031	32.042	337.8	80.97	0.2715	0.224	0.564	1	22.63	0.893946	0	0	0
methanol	291	17.6	0.0021	32.042	337.8	80.97	0.2715	0.224	0.564	1	22.63	0.893946	0	0	0
methanol	291	17	0.0028	32.042	337.8	80.97	0.2715	0.224	0.564	1	22.63	0.893946	0	0	0
methanol	291	16.4	0.0019	32.042	337.8	80.97	0.2715	0.224	0.564	1	22.63	0.893946	0	0	0
methanol	291	16	0.0026	32.042	337.8	80.97	0.2715	0.224	0.564	1	22.63	0.893946	0	0	0
methanol	291	15.1	0.0025	32.042	337.8	80.97	0.2715	0.224	0.564	1	22.63	0.893946	0	0	0
methanol	291	11	0.0018	32.042	337.8	80.97	0.2715	0.224	0.564	1	22.63	0.893946	0	0	0
methanol	288.15	110.2	0.0192	32.042	337.8	80.97	0.2715	0.224	0.564	1	22.63	0.893946	0	0	0
methanol	288.15	89.81	0.0152	32.042	337.8	80.97	0.2715	0.224	0.564	1	22.63	0.893946	0	0	0
methanol	288.15	69.73	0.0126	32.042	337.8	80.97	0.2715	0.224	0.564	1	22.63	0.893946	0	0	0
methanol	288.15	50	0.0098	32.042	337.8	80.97	0.2715	0.224	0.564	1	22.63	0.893946	0	0	0
methanol	288.15	30	0.0057	32.042	337.8	80.97	0.2715	0.224	0.564	1	22.63	0.893946	0	0	0
methanol	288.15	20	0.0034	32.042	337.8	80.97	0.2715	0.224	0.564	1	22.63	0.893946	0	0	0
methanol	278.15	110	0.0182	32.042	337.8	80.97	0.2715	0.224	0.564	1	22.63	0.893946	0	0	0
methanol	278.15	90	0.0153	32.042	337.8	80.97	0.2715	0.224	0.564	1	22.63	0.893946	0	0	0
[truncated: 1,762 more rows]
