# Supplementary material for: Mechanism-driven interpretable modeling of hydrogen solubility in organic compounds via a hierarchical transformer
Source: Royal Society of Chemistry journal article supplement (doi:10.1039/d5ta05515f), 2025-12-08
Supplement: d5ta05515f3.xlsx [file d5ta05515f3.xlsx]

## Sheet: Sheet1
Name	T (K)	P (bar)	x
1,2,3,4-tetrahydronaphthalene	623.15	73.81	0.085
1,2,3,4-tetrahydronaphthalene	623.15	60.53	0.072
1,2,3,4-tetrahydronaphthalene	623.15	47.43	0.058
1,2,3,4-tetrahydronaphthalene	623.15	30.93	0.041
1,2,3,4-tetrahydronaphthalene	623.15	15.3	0.025
1,2,3,4-tetrahydronaphthalene	543.15	88.06	0.071
1,2,3,4-tetrahydronaphthalene	543.15	67.35	0.055
1,2,3,4-tetrahydronaphthalene	543.15	54.86	0.045
1,2,3,4-tetrahydronaphthalene	543.15	36.73	0.03
1,2,3,4-tetrahydronaphthalene	543.15	18.26	0.017
1,2,3,4-tetrahydronaphthalene	453.15	91.91	0.054
1,2,3,4-tetrahydronaphthalene	453.15	77.3	0.046
1,2,3,4-tetrahydronaphthalene	453.15	54.39	0.034
1,2,3,4-tetrahydronaphthalene	453.15	41.63	0.024
1,2,3,4-tetrahydronaphthalene	453.15	21.73	0.014
1,2,4-trimethylbenzene	295	173.3	0.0571
1,2,4-trimethylbenzene	295	138.8	0.0467
1,2,4-trimethylbenzene	295	104.4	0.0354
1,2,4-trimethylbenzene	295	69.9	0.0248
1,3-propanediol	373.15	102.2	0.009577
1,3-propanediol	373.15	75.8	0.007135
1,3-propanediol	373.15	46.07	0.004343
1,3-propanediol	373.15	18.77	0.001808
1,3-propanediol	323.15	103.2	0.007404
1,3-propanediol	323.15	75.3	0.005486
1,3-propanediol	323.15	45.19	0.003281
1,3-propanediol	323.15	17.06	0.00125
1,3-propanediol	298.15	103.1	0.006502
1,3-propanediol	298.15	72.6	0.004621
1,3-propanediol	298.15	46.74	0.00296
1,3-propanediol	298.15	45.07	0.002868
1,3-propanediol	298.15	19.3	0.001238
1,4-butanediol	373.15	94.2	0.01187
1,4-butanediol	373.15	81.3	0.01034
1,4-butanediol	373.15	80.3	0.01014
1,4-butanediol	373.15	54.7	0.006937
1,4-butanediol	373.15	52.5	0.006668
1,4-butanediol	373.15	25.29	0.003243
1,4-butanediol	323.15	96	0.0093
1,4-butanediol	323.15	64.1	0.006221
1,4-butanediol	323.15	62.7	0.006155
1,4-butanediol	323.15	50.8	0.005
1,4-butanediol	323.15	46.48	0.004535
1,4-butanediol	323.15	36.08	0.003559
1,4-butanediol	323.15	21.69	0.002149
1,4-butanediol	298.15	98.9	0.00847
1,4-butanediol	298.15	78.6	0.006794
1,4-butanediol	298.15	75.8	0.006535
1,4-butanediol	298.15	44.6	0.003827
1,4-butanediol	298.15	15.42	0.00132
1,4-diethylbenzene	573.15	118.86	0.15494
1,4-diethylbenzene	573.15	96.68	0.12688
1,4-diethylbenzene	573.15	76.81	0.1
1,4-diethylbenzene	573.15	59.11	0.07567
1,4-diethylbenzene	573.15	41.89	0.05078
1,4-diethylbenzene	573.15	27.03	0.02808
1,4-diethylbenzene	563.15	124.34	0.15494
1,4-diethylbenzene	563.15	100.74	0.12688
1,4-diethylbenzene	563.15	79.55	0.1
1,4-diethylbenzene	563.15	60.82	0.07567
1,4-diethylbenzene	563.15	42.57	0.05078
1,4-diethylbenzene	563.15	26.79	0.02808
1,4-diethylbenzene	553.15	129.96	0.15494
1,4-diethylbenzene	553.15	104.91	0.12688
1,4-diethylbenzene	553.15	82.6	0.1
1,4-diethylbenzene	553.15	62.66	0.07567
1,4-diethylbenzene	553.15	43.38	0.05078
1,4-diethylbenzene	553.15	26.65	0.02808
1,4-diethylbenzene	543.15	135.97	0.15494
1,4-diethylbenzene	543.15	109.36	0.12688
1,4-diethylbenzene	543.15	85.67	0.1
1,4-diethylbenzene	543.15	64.63	0.07567
1,4-diethylbenzene	543.15	44.32	0.05078
1,4-diethylbenzene	543.15	26.69	0.02808
1,4-diethylbenzene	533.15	142.02	0.15494
1,4-diethylbenzene	533.15	114.03	0.12688
1,4-diethylbenzene	533.15	88.95	0.1
1,4-diethylbenzene	533.15	66.86	0.07567
1,4-diethylbenzene	533.15	45.45	0.05078
1,4-diethylbenzene	533.15	26.9	0.02808
1,4-diethylbenzene	523.15	148.39	0.15494
1,4-diethylbenzene	523.15	118.83	0.12688
1,4-diethylbenzene	523.15	92.54	0.1
1,4-diethylbenzene	523.15	69.2	0.07567
1,4-diethylbenzene	523.15	46.71	0.05078
1,4-diethylbenzene	523.15	27.21	0.02808
1,4-diethylbenzene	513.15	123.99	0.12688
1,4-diethylbenzene	513.15	96.28	0.1
1,4-diethylbenzene	513.15	71.73	0.07567
1,4-diethylbenzene	513.15	48.11	0.05078
1,4-diethylbenzene	513.15	27.65	0.02808
1,4-diethylbenzene	503.15	129.34	0.12688
1,4-diethylbenzene	503.15	100.22	0.1
1,4-diethylbenzene	503.15	74.48	0.07567
1,4-diethylbenzene	503.15	49.7	0.05078
1,4-diethylbenzene	503.15	28.21	0.02808
1,4-diethylbenzene	493.15	135.04	0.12688
1,4-diethylbenzene	493.15	104.46	0.1
1,4-diethylbenzene	493.15	77.43	0.07567
1,4-diethylbenzene	493.15	51.41	0.05078
1,4-diethylbenzene	493.15	28.91	0.02808
1,4-diethylbenzene	483.15	141.04	0.12688
1,4-diethylbenzene	483.15	108.8	0.1
1,4-diethylbenzene	483.15	80.53	0.07567
1,4-diethylbenzene	483.15	53.27	0.05078
1,4-diethylbenzene	483.15	29.74	0.02808
1,4-diethylbenzene	473.15	147.38	0.12688
1,4-diethylbenzene	473.15	113.51	0.1
1,4-diethylbenzene	473.15	84	0.07567
1,4-diethylbenzene	473.15	55.08	0.05078
1,4-diethylbenzene	473.15	33.18	0.03046
1,4-diethylbenzene	473.15	30.62	0.02808
1,4-diethylbenzene	463.15	118.46	0.1
1,4-diethylbenzene	463.15	87.33	0.07567
1,4-diethylbenzene	463.15	57.29	0.05078
1,4-diethylbenzene	463.15	31.66	0.02808
1,4-diethylbenzene	453.15	123.77	0.1
1,4-diethylbenzene	453.15	91.1	0.07567
1,4-diethylbenzene	453.15	59.67	0.05078
1,4-diethylbenzene	453.15	35.67	0.03046
1,4-diethylbenzene	453.15	32.83	0.02808
1,4-diethylbenzene	443.15	129.46	0.1
1,4-diethylbenzene	443.15	95.17	0.07567
1,4-diethylbenzene	443.15	62.18	0.05078
1,4-diethylbenzene	443.15	34.07	0.02808
1,4-diethylbenzene	433.15	135.45	0.1
1,4-diethylbenzene	433.15	99.46	0.07567
1,4-diethylbenzene	433.15	65.07	0.05078
1,4-diethylbenzene	433.15	38.6	0.03046
1,4-diethylbenzene	433.15	35.45	0.02808
1,4-diethylbenzene	423.15	203.93	0.1
1,4-diethylbenzene	423.15	104.06	0.07567
1,4-diethylbenzene	423.15	67.86	0.05078
1,4-diethylbenzene	423.15	37	0.02808
1,4-diethylbenzene	413.15	148.75	0.1
1,4-diethylbenzene	413.15	109.02	0.07567
1,4-diethylbenzene	413.15	70.97	0.05078
1,4-diethylbenzene	413.15	42.04	0.03046
1,4-diethylbenzene	413.15	38.59	0.02808
1,4-diethylbenzene	403.15	114.09	0.07567
1,4-diethylbenzene	403.15	74.12	0.05078
1,4-diethylbenzene	403.15	40.31	0.02808
1,4-diethylbenzene	393.15	120.08	0.07567
1,4-diethylbenzene	393.15	77.9	0.05078
1,4-diethylbenzene	393.15	42.24	0.02808
1,4-diethylbenzene	383.15	126.23	0.07567
1,4-diethylbenzene	383.15	81.83	0.05078
1,4-diethylbenzene	383.15	44.35	0.02808
1,4-diethylbenzene	373.15	132.92	0.07567
1,4-diethylbenzene	373.15	86.02	0.05078
1,4-diethylbenzene	373.15	46.61	0.02808
1,4-diethylbenzene	363.15	140	0.07567
1,4-diethylbenzene	363.15	90.62	0.05078
1,4-diethylbenzene	363.15	48.98	0.02808
1,4-diethylbenzene	353.15	147.75	0.07567
1,4-diethylbenzene	353.15	95.59	0.05078
1,4-diethylbenzene	353.15	51.66	0.02808
1,4-diethylbenzene	343.15	100.98	0.05078
1,4-diethylbenzene	343.15	54.5	0.02808
1,4-diethylbenzene	333.15	106.92	0.05078
1,4-diethylbenzene	333.15	57.6	0.02808
1,4-diethylbenzene	323.15	113.65	0.05078
1,4-diethylbenzene	323.15	68.08	0.02808
1,4-diethylbenzene	313.15	120.97	0.05078
1,4-diethylbenzene	313.15	65.03	0.02808
1,4-diethylbenzene	308.15	124.92	0.05078
1,4-diethylbenzene	308.15	67.13	0.02808
1,4-dioxane	373.15	91.2	0.02914
1,4-dioxane	373.15	63.8	0.02049
1,4-dioxane	373.15	27.8	0.00896
1,4-dioxane	323.15	99.4	0.02248
1,4-dioxane	323.15	57.1	0.01297
1,4-dioxane	323.15	28.6	0.00648
1,4-dioxane	298.15	94.6	0.01707
1,4-dioxane	298.15	65.85	0.01205
1,4-dioxane	298.15	18.95	0.00345
1-butanol	524.9	88.2	0.1064
1-butanol	512.6	81.7	0.0938
1-butanol	497.9	76.3	0.082
1-butanol	472.6	66.5	0.068
1-butanol	452.2	61.5	0.0584
1-butanol	421.6	54.3	0.0481
1-butanol	373.2	45.6	0.0367
1-butanol	373.15	78	0.02874
1-butanol	373.15	33.8	0.01294
1-butanol	373.15	30.4	0.01202
1-butanol	373.15	28.9	0.0111
1-butanol	373.15	22.3	0.008504
1-butanol	373.15	21.7	0.008243
1-butanol	373.15	18.8	0.007139
1-butanol	373.15	12.83	0.005024
1-butanol	373.15	9.82	0.003793
1-butanol	368.8	44.9	0.036
1-butanol	349.4	42	0.0327
1-butanol	323.15	99.3	0.0288
1-butanol	323.15	68.2	0.02006
1-butanol	323.15	43.5	0.01305
1-butanol	323.15	30.4	0.009293
1-butanol	323.15	25.4	0.007802
1-butanol	323.15	21.7	0.006734
1-butanol	323.15	15.61	0.004844
1-butanol	323.15	11.71	0.003669
1-butanol	323.15	8.33	0.002599
1-butanol	323.15	4.92	0.001561
1-butanol	322.6	40.6	0.0236
1-butanol	298.15	97.3	0.02488
1-butanol	298.15	80.7	0.02096
1-butanol	298.15	77.1	0.0199
1-butanol	298.15	28.5	0.0076
1-butanol	298.15	13.42	0.003697
1-butanol	298.15	13.41	0.003687
1-butanol	298.15	9.08	0.002492
1-butanol	298.15	5.79	0.001595
1-butanol	295.3	39.1	0.0137
1-butanol	291	31	0.0087
1-butanol	291	26	0.0071
1-butanol	291	21.5	0.006
1-butanol	291	15.2	0.0044
1-butyl acetate	291	31	0.014
1-butyl acetate	291	26.5	0.0109
1-butyl acetate	291	20.7	0.0084
1-butyl acetate	291	14.2	0.006
1-hexadecanol	514.9	48.61	0.0674
1-hexadecanol	509.5	48.08	0.0664
1-hexadecanol	504.4	47.6	0.0652
1-hexadecanol	500.2	47.2	0.0644
1-hexadecanol	494	46.61	0.0631
1-hexadecanol	490	46.24	0.0623
1-hexadecanol	485.1	45.8	0.0612
1-hexadecanol	480.3	45.35	0.0602
1-hexadecanol	474.5	44.81	0.0591
1-hexadecanol	469.9	44.37	0.0583
1-hexadecanol	465	43.88	0.0576
1-hexadecanol	459.8	43.36	0.0569
1-hexadecanol	454.9	42.87	0.0563
1-hexadecanol	450	42.38	0.0556
1-hexadecanol	445.1	41.89	0.0551
1-hexadecanol	440.5	41.44	0.0544
1-hexadecanol	435.3	40.95	0.0536
1-hexadecanol	429.9	40.44	0.0529
1-hexadecanol	425.2	39.99	0.0522
1-hexadecanol	420.3	39.52	0.0515
1-hexadecanol	415.3	39.02	0.051
1-hexadecanol	410	38.51	0.0505
1-hexadecanol	404.5	37.94	0.0501
1-hexadecanol	399.9	37.48	0.0497
1-hexadecanol	395.6	37.05	0.0493
1-hexadecanol	391.2	36.61	0.049
1-hexadecanol	385.8	36.12	0.0482
1-hexadecanol	380.9	35.67	0.0475
1-hexadecanol	376.3	35.24	0.0469
1-hexadecanol	372.1	34.82	0.0466
1-hexanol	373.15	102.4	0.04782
1-hexanol	373.15	87.1	0.04062
1-hexanol	373.15	73.7	0.03404
1-hexanol	373.15	32.6	0.01552
1-hexanol	323.15	103.4	0.03741
1-hexanol	323.15	83.1	0.02964
1-hexanol	323.15	66.6	0.02504
1-hexanol	323.15	44.3	0.01646
1-hexanol	323.15	34	0.01135
1-hexanol	298.15	98.7	0.03058
1-hexanol	298.15	79.9	0.02519
1-hexanol	298.15	57.1	0.0185
1-hexanol	298.15	51	0.01822
1-hexanol	298.15	30.1	0.00995
1-methyinaphthalene	573.15	125.75	0.08816
1-methyinaphthalene	573.15	91.51	0.06525
1-methyinaphthalene	573.15	75.92	0.05445
1-methyinaphthalene	573.15	55.07	0.0394
1-methyinaphthalene	573.15	31.87	0.02222
1-methyinaphthalene	563.15	130.6	0.08816
1-methyinaphthalene	563.15	94.82	0.06525
1-methyinaphthalene	563.15	56.83	0.0394
1-methyinaphthalene	563.15	32.64	0.02222
1-methyinaphthalene	553.15	135.58	0.08816
1-methyinaphthalene	553.15	98.29	0.06525
1-methyinaphthalene	553.15	58.67	0.0394
1-methyinaphthalene	553.15	33.45	0.02222
1-methyinaphthalene	543.15	140.91	0.08816
1-methyinaphthalene	543.15	102.67	0.06525
1-methyinaphthalene	543.15	60.71	0.0394
1-methyinaphthalene	543.15	34.38	0.02222
1-methyinaphthalene	533.15	146.45	0.08816
1-methyinaphthalene	533.15	106	0.06525
1-methyinaphthalene	533.15	62.87	0.0394
1-methyinaphthalene	533.15	35.37	0.02222
1-methyinaphthalene	523.15	152.37	0.08816
1-methyinaphthalene	523.15	110.07	0.06525
1-methyinaphthalene	523.15	65.14	0.0394
1-methyinaphthalene	523.15	36.54	0.02222
1-methyinaphthalene	513.15	158.56	0.08816
1-methyinaphthalene	513.15	114.53	0.06525
1-methyinaphthalene	513.15	94.6	0.05445
1-methyinaphthalene	513.15	67.64	0.0394
1-methyinaphthalene	513.15	37.8	0.02222
1-methyinaphthalene	503.15	119.24	0.06525
1-methyinaphthalene	503.15	70.26	0.0394
1-methyinaphthalene	503.15	39.13	0.02222
1-methyinaphthalene	493.15	124.18	0.06525
1-methyinaphthalene	493.15	73.08	0.0394
1-methyinaphthalene	493.15	40.59	0.02222
1-methyinaphthalene	483.15	129.38	0.06525
1-methyinaphthalene	483.15	76.06	0.0394
1-methyinaphthalene	483.15	42.22	0.02222
1-methyinaphthalene	473.15	134.98	0.06525
1-methyinaphthalene	473.15	79.19	0.0394
1-methyinaphthalene	473.15	44.2	0.02222
1-methyinaphthalene	463.15	140.38	0.06525
1-methyinaphthalene	463.15	82.32	0.0394
1-methyinaphthalene	463.15	45.49	0.02222
1-methyinaphthalene	453.15	147	0.06525
1-methyinaphthalene	453.15	86.13	0.0394
1-methyinaphthalene	453.15	47.44	0.02222
1-methyinaphthalene	443.15	153.85	0.06525
1-methyinaphthalene	443.15	89.89	0.0394
1-methyinaphthalene	443.15	49.5	0.02222
1-methyinaphthalene	433.15	161.47	0.06525
1-methyinaphthalene	433.15	94.02	0.0394
1-methyinaphthalene	433.15	51.78	0.02222
1-methyinaphthalene	423.15	98.57	0.0394
1-methyinaphthalene	423.15	52.32	0.02222
1-methyinaphthalene	413.15	103.36	0.0394
1-methyinaphthalene	413.15	56.79	0.02222
1-methyinaphthalene	403.15	108.31	0.0394
1-methyinaphthalene	403.15	59.71	0.02222
1-methyinaphthalene	393.15	114.46	0.0394
1-methyinaphthalene	393.15	62.64	0.02222
1-methyl-pyrrolidone-2	373.15	97.4	0.02297
1-methyl-pyrrolidone-2	373.15	69.6	0.01661
1-methyl-pyrrolidone-2	373.15	27.9	0.00663
1-methyl-pyrrolidone-2	373.15	14.1	0.00335
1-methyl-pyrrolidone-2	323.15	87.2	0.01459
1-methyl-pyrrolidone-2	323.15	43.4	0.00739
1-methyl-pyrrolidone-2	323.15	21.7	0.00372
1-methyl-pyrrolidone-2	298.15	83.4	0.01164
1-methyl-pyrrolidone-2	298.15	54.7	0.00778
1-methyl-pyrrolidone-2	298.15	27.8	0.00387
1-octanol	317.9	84.61	0.0341
1-octanol	317.9	70.22	0.0295
1-octanol	317.9	58.34	0.0256
1-octanol	317.9	47.27	0.0197
1-octanol	317.9	36.49	0.0156
1-octanol	317.9	25.73	0.0105
1-octanol	303.12	82.48	0.0304
1-octanol	303.12	70.83	0.027
1-octanol	303.12	58.75	0.0231
1-octanol	303.12	47.31	0.0184
1-octanol	303.12	36.49	0.0148
1-octanol	303.12	25.69	0.0106
1-octanol	295.15	13.79	0.00541
1-octanol	295.15	12.07	0.00426
1-octanol	295.15	10.34	0.0041
1-octanol	295.15	8.62	0.00336
1-octanol	295.15	6.9	0.00246
1-octanol	288.41	80.55	0.0271
1-octanol	288.41	69.41	0.0238
1-octanol	288.41	58.04	0.0205
1-octanol	288.41	47.19	0.0174
1-octanol	288.41	36.41	0.0127
1-octanol	288.41	25.7	0.0096
1-octanol	273.32	81.47	0.0245
1-octanol	273.32	69.81	0.0218
1-octanol	273.32	58.43	0.0191
1-octanol	273.32	47.5	0.0148
1-octanol	273.32	36.57	0.0122
1-octanol	273.32	25.89	0.0086
1-octene	333.15	70	0.059
1-octene	333.15	58.6	0.05
1-octene	333.15	44.8	0.038
1-octene	333.15	28.1	0.024
1-octene	333.15	9.4	0.008
1-octene	313.15	73.6	0.06
1-octene	313.15	53.5	0.043
1-octene	313.15	36.3	0.031
1-octene	313.15	22.7	0.019
1-octene	313.15	9.3	0.008
1-octene	295	207.8	0.1209
1-octene	295	173.3	0.1048
1-octene	295	138.8	0.0865
1-octene	295	104.4	0.0642
1-octene	295	69.9	0.0435
1-pentanol	373.15	79.7	0.0333
1-pentanol	373.15	60.5	0.0256
1-pentanol	373.15	33.4	0.0143
1-pentanol	323.15	88.4	0.0288
1-pentanol	323.15	55.3	0.0181
1-pentanol	323.15	25.4	0.0087
1-pentanol	298.15	98	0.0279
1-pentanol	298.15	78.6	0.023
1-pentanol	298.15	59.7	0.0171
1-pentanol	298.15	27.2	0.008
1-propanol	513.6	101.9	0.1052
1-propanol	504.2	96.1	0.0901
1-propanol	500.2	86	0.0767
1-propanol	494.8	90.3	0.08
1-propanol	488.7	79.3	0.0679
1-propanol	486.6	86.7	0.0727
1-propanol	475.6	81.3	0.0646
1-propanol	474.6	73.4	0.0578
1-propanol	463.5	76.6	0.0577
1-propanol	462.3	67.7	0.0524
1-propanol	452.5	73	0.0519
1-propanol	439.5	59.4	0.0438
1-propanol	433.2	65.8	0.0441
1-propanol	423.5	62.9	0.0407
1-propanol	412.5	59.7	0.0374
1-propanol	402.7	57.5	0.0344
1-propanol	387.9	54.3	0.0305
1-propanol	374.4	51.4	0.0277
1-propanol	373.15	97.7	0.0327
1-propanol	373.15	86.2	0.02891
1-propanol	373.15	47.5	0.0162
1-propanol	373.15	22.9	0.007441
1-propanol	363.7	49.2	0.0257
1-propanol	353.7	42.5	0.0213
1-propanol	348.4	47.1	0.0223
1-propanol	338.4	44.9	0.0214
1-propanol	326.1	43.5	0.0187
1-propanol	323.15	106	0.0266
1-propanol	323.15	74.7	0.01915
1-propanol	323.15	51.8	0.01357
1-propanol	323.15	36	0.00949
1-propanol	323.15	23.7	0.006296
1-propanol	301	36.4	0.0111
1-propanol	299.9	41.3	0.0119
1-propanol	298.15	99.3	0.022
1-propanol	298.15	77.4	0.0176
1-propanol	298.15	49.8	0.01153
1-propanol	298.15	24.6	0.005824
1-propanol	291	30.4	0.0074
1-propanol	291	22.5	0.0054
1-propanol	291	17.8	0.0044
1-propanol	291	12.7	0.0031
1-propyl acetate	291	40.9	0.0166
1-propyl acetate	291	31	0.0129
1-propyl acetate	291	23.5	0.0098
1-propyl acetate	291	15.9	0.0073
2,2,4-trimethylpentane	348.15	66.67	0.00869
2,2,4-trimethylpentane	348.15	52.28	0.0108
2,2,4-trimethylpentane	348.15	35.77	0.0155
2,2,4-trimethylpentane	323.15	62.82	0.00401
2,2,4-trimethylpentane	323.15	45.8	0.00506
2,2,4-trimethylpentane	323.15	33.34	0.00677
2,2,4-trimethylpentane	308.15	1.01	0.0008258
2,2,4-trimethylpentane	298.15	1.01	0.0007815
2,2,4-trimethylpentane	295	207.8	0.1452
2,2,4-trimethylpentane	295	173.3	0.1261
2,2,4-trimethylpentane	295	138.8	0.1013
2,2,4-trimethylpentane	295	104.4	0.0774
2,2,4-trimethylpentane	295	69.9	0.052
2,2,4-trimethylpentane	273.15	1.01	0.0006779
2,2,4-trimethylpentane	248.15	1.01	0.0005801
2,3-dimethylbutane	483.15	75.1	0.12728
2,3-dimethylbutane	483.15	66.05	0.10488
2,3-dimethylbutane	483.15	55.03	0.07759
2,3-dimethylbutane	483.15	43.79	0.04901
2,3-dimethylbutane	483.15	35.01	0.02679
2,3-dimethylbutane	473.15	80.53	0.12728
2,3-dimethylbutane	473.15	69.66	0.10488
2,3-dimethylbutane	473.15	56.62	0.07759
2,3-dimethylbutane	473.15	43.36	0.04901
2,3-dimethylbutane	473.15	33.2	0.02679
2,3-dimethylbutane	463.15	85.14	0.12728
2,3-dimethylbutane	463.15	72.72	0.10488
2,3-dimethylbutane	463.15	57.94	0.07759
2,3-dimethylbutane	463.15	43	0.04901
2,3-dimethylbutane	463.15	31.58	0.02679
2,3-dimethylbutane	453.15	89.51	0.12728
2,3-dimethylbutane	453.15	75.7	0.10488
2,3-dimethylbutane	453.15	59.28	0.07759
2,3-dimethylbutane	453.15	42.77	0.04901
2,3-dimethylbutane	453.15	30.21	0.02679
2,3-dimethylbutane	443.15	93.91	0.12728
2,3-dimethylbutane	443.15	78.74	0.10488
2,3-dimethylbutane	443.15	60.79	0.07759
2,3-dimethylbutane	443.15	42.77	0.04901
2,3-dimethylbutane	443.15	29.1	0.02679
2,3-dimethylbutane	433.15	101.9	0.12728
2,3-dimethylbutane	433.15	81.96	0.10488
2,3-dimethylbutane	433.15	62.51	0.07759
2,3-dimethylbutane	433.15	43	0.04901
2,3-dimethylbutane	433.15	28.24	0.02679
2,3-dimethylbutane	423.15	103.23	0.12728
2,3-dimethylbutane	423.15	85.45	0.10488
2,3-dimethylbutane	423.15	64.45	0.07759
2,3-dimethylbutane	423.15	43.48	0.04901
2,3-dimethylbutane	423.15	27.65	0.02679
2,3-dimethylbutane	413.15	108.31	0.12728
2,3-dimethylbutane	413.15	89.16	0.10488
2,3-dimethylbutane	413.15	66.67	0.07759
2,3-dimethylbutane	413.15	44.22	0.04901
2,3-dimethylbutane	413.15	27.29	0.02679
2,3-dimethylbutane	403.15	113.94	0.12728
2,3-dimethylbutane	403.15	93.36	0.10488
2,3-dimethylbutane	403.15	69.28	0.07759
2,3-dimethylbutane	403.15	45.26	0.04901
2,3-dimethylbutane	403.15	27.16	0.02679
2,3-dimethylbutane	393.15	119.46	0.12728
2,3-dimethylbutane	393.15	97.59	0.10488
2,3-dimethylbutane	393.15	72.32	0.07759
2,3-dimethylbutane	393.15	46.44	0.04901
2,3-dimethylbutane	393.15	27.27	0.02679
2,3-dimethylbutane	383.15	125.6	0.12728
2,3-dimethylbutane	383.15	102.32	0.10488
2,3-dimethylbutane	383.15	75.05	0.07759
2,3-dimethylbutane	383.15	47.95	0.04901
2,3-dimethylbutane	383.15	27.59	0.02679
2,3-dimethylbutane	373.15	132.24	0.12728
2,3-dimethylbutane	373.15	107.45	0.10488
2,3-dimethylbutane	373.15	78.47	0.07759
2,3-dimethylbutane	373.15	49.69	0.04901
2,3-dimethylbutane	373.15	27.79	0.02679
2,3-dimethylbutane	363.15	139.37	0.12728
2,3-dimethylbutane	363.15	113.02	0.10488
2,3-dimethylbutane	363.15	82.2	0.07759
2,3-dimethylbutane	363.15	51.7	0.04901
2,3-dimethylbutane	363.15	28.85	0.02679
2,3-dimethylbutane	353.15	147.15	0.12728
2,3-dimethylbutane	353.15	119.08	0.10488
2,3-dimethylbutane	353.15	86.36	0.07759
2,3-dimethylbutane	353.15	53.98	0.04901
2,3-dimethylbutane	353.15	29.77	0.02679
2,3-dimethylbutane	343.15	155.41	0.12728
2,3-dimethylbutane	343.15	125.65	0.10488
2,3-dimethylbutane	343.15	90.59	0.07759
2,3-dimethylbutane	343.15	56.52	0.04901
2,3-dimethylbutane	343.15	30.94	0.02679
2,3-dimethylbutane	333.15	164.49	0.12728
2,3-dimethylbutane	333.15	132.74	0.10488
2,3-dimethylbutane	333.15	95.83	0.07759
2,3-dimethylbutane	333.15	59.36	0.04901
2,3-dimethylbutane	333.15	32.22	0.02679
2,3-dimethylbutane	323.15	140.5	0.10488
2,3-dimethylbutane	323.15	101.2	0.07759
2,3-dimethylbutane	323.15	62.51	0.04901
2,3-dimethylbutane	323.15	33.78	0.02679
2,3-dimethylbutane	313.15	149.06	0.10488
2,3-dimethylbutane	313.15	107.07	0.07759
2,3-dimethylbutane	313.15	66	0.04901
2,3-dimethylbutane	313.15	35.49	0.02679
2,3-dimethylbutane	308.15	153.54	0.10488
2,3-dimethylbutane	308.15	110.32	0.07759
2,3-dimethylbutane	308.15	67.86	0.04901
2,3-dimethylbutane	308.15	36.44	0.02679
2-aminoethanol	423.15	117.2	0.01342
2-aminoethanol	423.15	69.9	0.00792
2-aminoethanol	423.15	54.6	0.006214
2-aminoethanol	423.15	43.5	0.0049
2-aminoethanol	423.15	41.3	0.00478
2-aminoethanol	423.15	40.4	0.00467
2-aminoethanol	398.15	90.8	0.00898
2-aminoethanol	398.15	76.7	0.00756
2-aminoethanol	398.15	68	0.00669
2-aminoethanol	373.15	82.9	0.00668
2-aminoethanol	373.15	70.5	0.00563
2-aminoethanol	373.15	59.9	0.0049
2-aminoethanol	373.15	48.5	0.00391
2-aminoethanol	373.15	33.1	0.00265
2-aminoethanol	348.15	106.2	0.00699
2-aminoethanol	348.15	94.4	0.00614
2-aminoethanol	348.15	73.4	0.00477
2-aminoethanol	348.15	69.1	0.00449
2-aminoethanol	323.15	159.3	0.00841
2-aminoethanol	323.15	117.9	0.00634
2-aminoethanol	323.15	97.1	0.00529
2-aminoethanol	323.15	74.7	0.00397
2-aminoethanol	323.15	50.8	0.0027
2-aminoethanol	323.15	30.7	0.00161
2-butanol	373.15	100	0.0419
2-butanol	373.15	52.6	0.02266
2-butanol	373.15	19.8	0.00851
2-butanol	323.15	98.6	0.03
2-butanol	323.15	50.7	0.0158
2-butanol	323.15	30.1	0.0093
2-butanol	298.15	98.6	0.0261
2-butanol	298.15	76.8	0.0205
2-butanol	298.15	52.1	0.0139
2-butanol	298.15	28.1	0.0075
2-butoxyethanol	373.15	84	0.03815
2-butoxyethanol	373.15	65.9	0.03031
2-butoxyethanol	373.15	36.2	0.01701
2-butoxyethanol	323.15	102.7	0.03367
2-butoxyethanol	323.15	77.1	0.02608
2-butoxyethanol	323.15	56.8	0.01954
2-butoxyethanol	323.15	35.5	0.01245
2-butoxyethanol	323.15	34.4	0.01207
2-butoxyethanol	298.15	84.4	0.02484
2-butoxyethanol	298.15	70.7	0.02086
2-butoxyethanol	298.15	63.8	0.01911
2-butoxyethanol	298.15	44.1	0.01341
2-ethoxyethanol	373.15	102	0.0323
2-ethoxyethanol	373.15	101.7	0.0326
2-ethoxyethanol	373.15	56.1	0.0188
2-ethoxyethanol	323.15	103	0.0241
2-ethoxyethanol	323.15	75.6	0.01848
2-ethoxyethanol	323.15	66	0.01601
2-ethoxyethanol	323.15	41.4	0.01049
2-ethoxyethanol	323.15	26.2	0.006192
2-ethoxyethanol	298.15	108.2	0.0216
2-ethoxyethanol	298.15	59.3	0.01247
2-ethoxyethanol	298.15	40.4	0.008661
2-ethoxyethanol	298.15	23.9	0.005241
2-ethylhexanol-1	393.15	46.1	0.02877
2-ethylhexanol-1	393.15	26.9	0.01713
2-ethylhexanol-1	373.15	96.5	0.0524
2-ethylhexanol-1	373.15	62.6	0.0349
2-ethylhexanol-1	323.15	97.8	0.041
2-ethylhexanol-1	323.15	50.3	0.0222
2-ethylhexanol-1	298.15	94.6	0.0343
2-ethylhexanol-1	298.15	77.4	0.0289
2-ethylhexanol-1	298.15	44.2	0.01708
2-ethylhexanol-1	298.15	34.3	0.01321
2-ethylhexanol-1	298.15	19.72	0.00758
2-methoxyethanol	373.15	87.8	0.02117
2-methoxyethanol	373.15	45.4	0.011
2-methoxyethanol	373.15	27.5	0.0067
2-methoxyethanol	323.15	81	0.01399
2-methoxyethanol	323.15	71.6	0.01253
2-methoxyethanol	323.15	56.5	0.009865
2-methoxyethanol	323.15	33.6	0.005911
2-methoxyethanol	298.15	101	0.0143
2-methoxyethanol	298.15	56.9	0.0082
2-methoxyethanol	298.15	34.2	0.0049
2-methyl-1-propanol	373.15	88.9	0.0354
2-methyl-1-propanol	373.15	26.5	0.0111
2-methyl-1-propanol	323.15	82.5	0.0255
2-methyl-1-propanol	323.15	34.5	0.0113
2-methyl-1-propanol	298.15	97.2	0.0263
2-methyl-1-propanol	298.15	52.8	0.0145
2-methyl-1-propanol	298.15	26.5	0.0014
2-methylbutanal	383.15	101.3	0.097
2-methylbutanal	383.15	81	0.082
2-methylbutanal	383.15	50.7	0.055
2-methylbutanal	383.15	10.1	0.01
2-methylbutanal	383.15	5.1	0.0035
2-methylbutanal	363.15	101.3	0.091
2-methylbutanal	363.15	81	0.07
2-methylbutanal	363.15	50.7	0.05
2-methylbutanal	363.15	10.1	0.0102
2-methylbutanal	363.15	5.1	0.0046
2-methylbutanal	363.15	1	0.0001
2-methylbutanal	343.15	101.3	0.08
2-methylbutanal	343.15	81	0.071
2-methylbutanal	343.15	50.7	0.047
2-methylbutanal	343.15	10.1	0.01
2-methylbutanal	343.15	5.1	0.0048
2-methylbutanal	343.15	1	0.0006
2-methylbutanal	323.15	101.3	0.08
2-methylbutanal	323.15	81	0.066
2-methylbutanal	323.15	50.7	0.043
2-methylbutanal	323.15	10.1	0.01
2-methylbutanal	323.15	5.1	0.0047
2-methylbutanal	323.15	1	0.0008
2-methylbutanal	303.15	10.1	0.009
2-methylbutanal	303.15	5.1	0.0045
2-methylbutanal	303.15	1	0.001
2-propanol	476.1	69.7	0.0365
2-propanol	475.9	124.4	0.0637
2-propanol	399.1	124.7	0.0501
2-propanol	399.1	99.6	0.0395
2-propanol	399.1	69.7	0.0305
2-propanol	373.15	89.2	0.03446
2-propanol	373.15	61.7	0.02403
2-propanol	373.15	36.7	0.01429
2-propanol	373.15	30.9	0.01201
2-propanol	373.15	26.1	0.01021
2-propanol	373.15	12	0.004289
2-propanol	373.15	9.35	0.003198
2-propanol	323.5	69.7	0.0199
2-propanol	323.5	53	0.0139
2-propanol	323.4	124.7	0.0347
2-propanol	323.4	124.5	0.035
2-propanol	323.4	99.6	0.0288
2-propanol	323.4	53	0.0139
2-propanol	323.15	92.4	0.02455
2-propanol	323.15	83.1	0.02453
2-propanol	323.15	73.3	0.02193
2-propanol	323.15	53.3	0.01608
2-propanol	323.15	40.4	0.01211
2-propanol	323.15	27	0.008469
2-propanol	323.15	24.3	0.007467
2-propanol	323.15	12.2	0.003714
2-propanol	323.15	6.98	0.00212
2-propanol	298.15	97.2	0.02454
2-propanol	298.15	74.2	0.01886
2-propanol	298.15	63.5	0.01634
2-propanol	298.15	45.2	0.01174
2-propanol	298.15	45.1	0.01165
2-propanol	298.15	36.5	0.009626
2-propanol	298.15	21.2	0.005658
2-propanol	298.15	20.2	0.005385
2-propanol	298.15	15.9	0.00424
2-propanol	298.15	10.8	0.002933
2-propanol	298.15	10.2	0.002771
2-propanol	298.15	7.51	0.002068
2-propyl acetate	291	30.4	0.0147
2-propyl acetate	291	23.8	0.0114
2-propyl acetate	291	18	0.0085
2-propyl acetate	291	13.1	0.0066
acetic acid	348.15	74	0.0203
acetic acid	348.15	68.8	0.0187
acetic acid	348.15	62.6	0.0174
acetic acid	348.15	56.7	0.0166
acetic acid	348.15	50.2	0.0154
acetic acid	348.15	43.6	0.0131
acetic acid	348.15	36.8	0.0115
acetic acid	348.15	29.6	0.0086
acetic acid	348.15	24	0.0072
acetic acid	348.15	17.8	0.0055
acetic acid	348.15	14	0.004
acetic acid	348.15	10.7	0.0037
acetic acid	348.15	8.1	0.003
acetic acid	348.15	6.3	0.0022
acetic acid	348.15	4.9	0.002
acetic acid	348.15	3.5	0.0016
acetic acid	348.15	2.7	0.0012
acetic acid	323.15	74.5	0.0215
acetic acid	323.15	69.6	0.0194
acetic acid	323.15	64.9	0.0187
acetic acid	323.15	60.4	0.017
acetic acid	323.15	55.6	0.0158
acetic acid	323.15	50.7	0.0142
acetic acid	323.15	45.7	0.0128
acetic acid	323.15	40.6	0.0114
acetic acid	323.15	35.5	0.0099
acetic acid	323.15	30.5	0.0085
acetic acid	323.15	25.5	0.0073
acetic acid	323.15	21.7	0.0065
acetic acid	323.15	17.5	0.005
acetic acid	323.15	14.3	0.0041
acetic acid	298.15	70.4	0.0197
acetic acid	298.15	63.9	0.0175
acetic acid	298.15	58.2	0.0161
acetic acid	298.15	52	0.0144
acetic acid	298.15	46.2	0.0133
acetic acid	298.15	39.9	0.0117
acetic acid	298.15	33.5	0.0102
acetic acid	298.15	28.5	0.0088
acetic acid	298.15	24.7	0.0075
acetic acid	298.15	21	0.0067
acetic acid	298.15	17.4	0.0057
acetic acid	298.15	12.8	0.004
acetic acid	298.15	7.7	0.0029
acetic acid	298.15	5.5	0.0023
acetone	373.15	84.4	0.03914
acetone	373.15	69.7	0.03236
acetone	373.15	43.6	0.02107
acetone	373.15	31.4	0.0137
acetone	323.15	99.6	0.03371
acetone	323.15	67.1	0.02258
acetone	323.15	67	0.02286
acetone	323.15	42.4	0.01435
acetone	323.15	40.5	0.01378
acetone	323.15	17.62	0.00589
acetone	298.15	94.8	0.02657
acetone	298.15	88.1	0.02455
acetone	298.15	73.4	0.02091
acetone	298.15	54.1	0.0152
acetone	298.15	52.8	0.01494
acetone	298.15	47.3	0.01321
acetone	298.15	32.3	0.0091
acetone	298.15	27.5	0.00787
acetone	298.15	14.73	0.00418
acetonitrile	373.15	103.9	0.02939
acetonitrile	373.15	84.8	0.02391
acetonitrile	373.15	41.2	0.01166
acetonitrile	373.15	21.1	0.00582
acetonitrile	373.15	9.46	0.00233
acetonitrile	323.15	100.5	0.02049
acetonitrile	323.15	86.8	0.01829
acetonitrile	323.15	76.1	0.01558
acetonitrile	323.15	57.8	0.01225
acetonitrile	323.15	38.3	0.00794
acetonitrile	323.15	29.2	0.0062
acetonitrile	323.15	15.54	0.00324
acetonitrile	298.15	102.5	0.01736
acetonitrile	298.15	97.2	0.0169
acetonitrile	298.15	67.7	0.01161
acetonitrile	298.15	60.8	0.01067
acetonitrile	298.15	36.6	0.00647
acetonitrile	298.15	35.9	0.00619
acetonitrile	298.15	15.94	0.0028
allyl alcohol	473	103.9	0.0488
allyl alcohol	473	87	0.0388
allyl alcohol	473	73.4	0.0315
allyl alcohol	473	63.1	0.0259
allyl alcohol	473	44	0.0144
allyl alcohol	443	152.5	0.0616
allyl alcohol	443	133.4	0.053
allyl alcohol	443	123.2	0.0487
allyl alcohol	443	105.8	0.0415
allyl alcohol	443	80.1	0.0302
allyl alcohol	443	62.2	0.0223
allyl alcohol	402	150.1	0.0472
allyl alcohol	401.9	135.6	0.0423
allyl alcohol	401.9	116	0.0359
allyl alcohol	401.9	105.7	0.0322
allyl alcohol	401.9	85.5	0.0266
allyl alcohol	341.5	146.2	0.0315
allyl alcohol	341.5	126.7	0.0273
allyl alcohol	341.5	109	0.023
allyl alcohol	341.5	80.2	0.0172
allyl alcohol	341.5	69.3	0.0143
alpha-methylstyrene	373.15	68.95	0.0304
alpha-methylstyrene	373.15	55.16	0.0247
alpha-methylstyrene	373.15	34.47	0.0155
alpha-methylstyrene	373.15	20.68	0.00945
alpha-methylstyrene	373.15	6.89	0.00336
alpha-methylstyrene	333.15	68.95	0.0254
alpha-methylstyrene	333.15	55.16	0.0203
alpha-methylstyrene	333.15	34.47	0.0129
alpha-methylstyrene	333.15	20.68	0.00788
alpha-methylstyrene	333.15	6.89	0.00284
alpha-methylstyrene	323	130	0.0407
alpha-methylstyrene	323	90.1	0.0289
alpha-methylstyrene	323	70.1	0.022
alpha-methylstyrene	323	50.1	0.0157
alpha-methylstyrene	323	30	0.0098
alpha-methylstyrene	323	20	0.0068
alpha-methylstyrene	323	10	0.0033
alpha-methylstyrene	308	130	0.0371
alpha-methylstyrene	308	90.3	0.0271
alpha-methylstyrene	308	70	0.0209
alpha-methylstyrene	308	30.2	0.0089
alpha-methylstyrene	303.15	68.95	0.0212
alpha-methylstyrene	303.15	55.16	0.0171
alpha-methylstyrene	303.15	34.47	0.0108
alpha-methylstyrene	303.15	20.68	0.00655
alpha-methylstyrene	303.15	6.89	0.00239
benzene	423.2	107.3	0.0585
benzene	423.2	104.4	0.0569
benzene	423.2	74	0.04
benzene	423.2	70.7	0.0381
benzene	423.2	48.5	0.0254
benzene	423.2	40.5	0.0207
benzene	373.2	127.1	0.0523
benzene	373.2	115.1	0.0477
benzene	373.2	75.7	0.0316
benzene	373.2	56	0.0233
benzene	373.2	41.5	0.0173
benzene	373.2	25.5	0.0103
benzene	323.2	157.3	0.0455
benzene	323.2	119.7	0.0351
benzene	323.2	98	0.029
benzene	323.2	82.2	0.0245
benzene	323.2	45.6	0.0138
benzene	323.2	40.7	0.0123
benzene	308.15	1.01	0.0002805
benzene	303.15	46.01	0.01268
benzene	303.15	39.04	0.010775
benzene	303.15	35.44	0.009835
benzene	303.15	27.44	0.007616
benzene	303.15	22.07	0.006012
benzene	303.15	20.22	0.005606
benzene	303.15	16.84	0.004687
benzene	303.15	11.43	0.003951
benzene	303.15	9.89	0.002673
benzene	298.15	1.01	0.0002578
benzene	295	173.3	0.0424
benzene	295	138.8	0.0341
benzene	295	104.4	0.0269
benzene	295	69.9	0.0172
benzene	283.15	1.01	0.0002253
cumene	373.15	68.95	0.0397
cumene	373.15	55.16	0.0327
cumene	373.15	34.47	0.0205
cumene	373.15	20.68	0.0125
cumene	373.15	6.89	0.00415
cumene	333.15	68.95	0.0324
cumene	333.15	55.16	0.026
cumene	333.15	34.47	0.0167
cumene	333.15	20.68	0.0102
cumene	333.15	6.89	0.00344
cumene	323	117	0.0486
cumene	323	90.2	0.0367
cumene	323	49.7	0.0217
cumene	323	30.1	0.0132
cumene	323	10.2	0.004
cyclohexane	523.15	107.58	0.12996
cyclohexane	523.15	88.45	0.10019
cyclohexane	523.15	74.74	0.07817
cyclohexane	523.15	53.49	0.04349
cyclohexane	523.15	39.33	0.01982
cyclohexane	523.15	39.02	0.01931
cyclohexane	513.15	113.71	0.12996
cyclohexane	513.15	92.04	0.10019
cyclohexane	513.15	76.61	0.07817
cyclohexane	513.15	52.85	0.04349
cyclohexane	513.15	37.1	0.01982
cyclohexane	503.15	119.44	0.12996
cyclohexane	503.15	95.55	0.10019
cyclohexane	503.15	78.48	0.07817
cyclohexane	503.15	52.37	0.04349
cyclohexane	503.15	35.14	0.01982
cyclohexane	493.15	125.23	0.12996
cyclohexane	493.15	99.14	0.10019
cyclohexane	493.15	80.52	0.07817
cyclohexane	493.15	52.2	0.04349
cyclohexane	493.15	33.49	0.01982
cyclohexane	483.15	131.36	0.12996
cyclohexane	483.15	102.96	0.10019
cyclohexane	483.15	82.89	0.07817
cyclohexane	483.15	52.22	0.04349
cyclohexane	483.15	32.09	0.01982
cyclohexane	483.15	31.66	0.01931
cyclohexane	473.15	137.67	0.12996
cyclohexane	473.15	106.93	0.10019
cyclohexane	473.15	85.37	0.07817
cyclohexane	473.15	48.38	0.04349
cyclohexane	473.15	30.96	0.01982
cyclohexane	463.15	144.28	0.12996
cyclohexane	463.15	111.52	0.10019
cyclohexane	463.15	88.3	0.07817
cyclohexane	463.15	53.13	0.04349
cyclohexane	463.15	30.1	0.01982
cyclohexane	453.15	151.51	0.12996
cyclohexane	453.15	116.25	0.10019
cyclohexane	453.15	91.47	0.07817
cyclohexane	453.15	54.01	0.04349
cyclohexane	453.15	29.51	0.01982
cyclohexane	443.15	159.14	0.12996
cyclohexane	443.15	121.64	0.10019
cyclohexane	443.15	95.17	0.07817
cyclohexane	443.15	55.21	0.04349
cyclohexane	443.15	29.19	0.01982
cyclohexane	433.15	127.36	0.10019
cyclohexane	433.15	99.17	0.07817
cyclohexane	433.15	56.71	0.04349
cyclohexane	433.15	29.05	0.01982
cyclohexane	423.15	133.6	0.10019
cyclohexane	423.15	103.61	0.07817
cyclohexane	423.15	58.51	0.04349
cyclohexane	423.15	29.19	0.01982
cyclohexane	413.15	140.45	0.10019
cyclohexane	413.15	108.54	0.07817
cyclohexane	413.15	60.66	0.04349
cyclohexane	413.15	29.53	0.01982
cyclohexane	403.15	147.45	0.10019
cyclohexane	403.15	113.62	0.07817
cyclohexane	403.15	62.8	0.04349
cyclohexane	403.15	30.06	0.01982
cyclohexane	393.15	155.89	0.10019
cyclohexane	393.15	119.86	0.07817
cyclohexane	393.15	65.89	0.04349
cyclohexane	393.15	30.93	0.01982
cyclohexane	383.15	164.81	0.10019
cyclohexane	383.15	126.32	0.07817
cyclohexane	383.15	71.06	0.04349
cyclohexane	383.15	31.97	0.01982
cyclohexane	373.15	133.49	0.07817
cyclohexane	373.15	72.61	0.04349
cyclohexane	373.15	68.95	0.03686
cyclohexane	373.15	55.16	0.0299
cyclohexane	373.15	34.47	0.0186
cyclohexane	373.15	33.25	0.01982
cyclohexane	373.15	20.68	0.0112
cyclohexane	373.15	6.89	0.0032
cyclohexane	373	43.9	0.02951
cyclohexane	373	26.9	0.01785
cyclohexane	373	5	0.00261
cyclohexane	363.15	141.47	0.07817
cyclohexane	363.15	76.6	0.04349
cyclohexane	363.15	34.78	0.01982
cyclohexane	353.15	150.28	0.07817
cyclohexane	353.15	81	0.04349
cyclohexane	353.15	36.52	0.01982
cyclohexane	343.15	160.12	0.07817
cyclohexane	343.15	85.96	0.04349
cyclohexane	343.15	38.63	0.01982
cyclohexane	333.15	91.6	0.04349
cyclohexane	333.15	68.95	0.0293
cyclohexane	333.15	55.16	0.0258
cyclohexane	333.15	40.86	0.01982
cyclohexane	333.15	34.47	0.0159
cyclohexane	333.15	20.68	0.0094
cyclohexane	333.15	6.89	0.00311
cyclohexane	332	46	0.02345
cyclohexane	332	24	0.01247
cyclohexane	332	5.67	0.0029
cyclohexane	323.15	98.52	0.04349
cyclohexane	323.15	43.62	0.01982
cyclohexane	313.15	105.01	0.04349
cyclohexane	313.15	46.55	0.01982
cyclohexane	308.15	108.87	0.04349
cyclohexane	308.15	48.2	0.01982
cyclohexane	304	44.9	0.01887
cyclohexane	304	26.8	0.01124
cyclohexane	304	6.42	0.00291
cyclohexane	304	1.31	0.00063
cyclohexane	303.15	68.95	0.0248
cyclohexane	303.15	55.16	0.0202
cyclohexane	303.15	47.43	0.019661
cyclohexane	303.15	42.07	0.017368
cyclohexane	303.15	35.47	0.014731
cyclohexane	303.15	34.47	0.0127
cyclohexane	303.15	30.05	0.012547
cyclohexane	303.15	26.87	0.011268
cyclohexane	303.15	21.43	0.008771
cyclohexane	303.15	20.9	0.008597
cyclohexane	303.15	20.68	0.00769
cyclohexane	303.15	17.16	0.00713
cyclohexane	303.15	14.68	0.005955
cyclohexane	303.15	12.02	0.004833
cyclohexane	303.15	8.87	0.003456
cyclohexane	303.15	6.89	0.00273
cyclohexane	295	173.3	0.0683
cyclohexane	295	138.8	0.0556
cyclohexane	295	104.4	0.0417
cyclohexane	295	69.9	0.0287
cyclohexanone	373.15	68.95	0.0243
cyclohexanone	373.15	55.16	0.02
cyclohexanone	373.15	34.47	0.0125
cyclohexanone	373.15	20.68	0.00748
cyclohexanone	373.15	6.89	0.00263
cyclohexanone	333.15	68.95	0.0185
cyclohexanone	333.15	55.16	0.0157
cyclohexanone	333.15	34.47	0.0101
cyclohexanone	333.15	20.68	0.00615
cyclohexanone	333.15	6.89	0.00203
cyclohexanone	303.15	68.95	0.0151
cyclohexanone	303.15	55.16	0.0124
cyclohexanone	303.15	34.47	0.00787
cyclohexanone	303.15	20.68	0.00472
cyclohexanone	303.15	6.89	0.00158
cyclohexene	373.15	68.95	0.0349
cyclohexene	373.15	55.16	0.028
cyclohexene	373.15	34.47	0.0176
cyclohexene	373.15	20.68	0.0103
cyclohexene	373.15	6.89	0.00303
cyclohexene	303.15	68.95	0.0225
cyclohexene	303.15	55.16	0.0178
cyclohexene	303.15	34.47	0.0115
cyclohexene	303.15	20.68	0.00702
cyclohexene	303.15	6.89	0.00238
dicyclohexylmethane	473.15	98.13	0.1014
dicyclohexylmethane	473.15	56.05	0.0593
dicyclohexylmethane	473.15	42.41	0.0454
dicyclohexylmethane	423.15	87.68	0.0775
dicyclohexylmethane	423.15	49.42	0.0456
dicyclohexylmethane	423.15	38.12	0.0339
dicyclohexylmethane	373.15	78.23	0.0582
dicyclohexylmethane	373.15	43.63	0.0339
dicyclohexylmethane	373.15	34.23	0.0233
dicyclohexylmethane	323.15	67.56	0.0374
dicyclohexylmethane	323.15	65.48	0.0431
dicyclohexylmethane	323.15	37.54	0.0218
dicyclohexylmethane	323.15	29.85	0.013
dicyclohexylmethane	323.15	15.39	0.0059
dicyclohexylmethane	323.15	8.95	0.0028
diethylene glycol	373.15	99.9	0.01189
diethylene glycol	373.15	80.7	0.009687
diethylene glycol	373.15	66	0.00797
diethylene glycol	373.15	24.1	0.002932
diethylene glycol	323.15	99.6	0.008741
diethylene glycol	323.15	76.3	0.006733
diethylene glycol	323.15	39.58	0.003533
diethylene glycol	323.15	27.44	0.002478
diethylene glycol	298.15	99.9	0.007358
diethylene glycol	298.15	89.1	0.006557
diethylene glycol	298.15	72.9	0.005417
diethylene glycol	298.15	45.47	0.003411
diethylene glycol	298.15	19.16	0.001452
diethylene glycol monomethyl ether	373.15	106.3	0.02991
diethylene glycol monomethyl ether	373.15	72.7	0.02085
diethylene glycol monomethyl ether	373.15	39.6	0.01153
diethylene glycol monomethyl ether	373.15	21.1	0.006214
diethylene glycol monomethyl ether	323.15	104.1	0.02107
diethylene glycol monomethyl ether	323.15	72.5	0.01489
diethylene glycol monomethyl ether	323.15	43.2	0.008947
diethylene glycol monomethyl ether	323.15	14.86	0.003119
diethylene glycol monomethyl ether	298.15	101.9	0.01691
diethylene glycol monomethyl ether	298.15	69.7	0.01176
diethylene glycol monomethyl ether	298.15	41.85	0.007176
diethylene glycol monomethyl ether	298.15	14.41	0.002478
dimethyl ether	316.15	68.4	0.068
dimethyl ether	316.15	61.4	0.061
dimethyl ether	316.15	54.8	0.052
dimethyl ether	316.15	48.4	0.042
dimethyl ether	316.15	41.9	0.037
dimethyl ether	316.15	36.2	0.028
dimethyl ether	316.15	30.9	0.021
dimethyl ether	316.15	26.4	0.016
dimethyl ether	316.15	22.4	0.011
dimethyl ether	316.15	18.8	0.007
dimethyl ether	316.15	15.9	0.005
dimethyl ether	316.15	13.4	0.003
dimethyl ether	316.15	11.5	0.001
dimethyl ether	316.15	10.3	0.001
dimethyl ether	306.15	79.9	0.072
dimethyl ether	306.15	72.1	0.063
dimethyl ether	306.15	65.6	0.06
dimethyl ether	306.15	58.7	0.052
dimethyl ether	306.15	52.1	0.046
dimethyl ether	306.15	45.5	0.039
dimethyl ether	306.15	38.7	0.03
dimethyl ether	306.15	32.2	0.024
dimethyl ether	306.15	27.3	0.018
dimethyl ether	306.15	23.2	0.013
dimethyl ether	306.15	19.6	0.01
dimethyl ether	306.15	16.5	0.007
dimethyl ether	306.15	14	0.005
dimethyl ether	306.15	11.8	0.003
dimethyl ether	306.15	9.6	0.002
dimethyl ether	306.15	8.5	0.001
dimethyl ether	288.15	71.4	0.058
dimethyl ether	288.15	64.4	0.047
dimethyl ether	288.15	57.4	0.043
dimethyl ether	288.15	50.4	0.038
dimethyl ether	288.15	43.5	0.032
dimethyl ether	288.15	36.9	0.025
dimethyl ether	288.15	30.9	0.02
dimethyl ether	288.15	25.6	0.015
dimethyl ether	288.15	20.9	0.011
dimethyl ether	288.15	16.9	0.008
dimethyl ether	288.15	11.7	0.006
dimethyl ether	288.15	11.2	0.004
dimethyl ether	288.15	9.3	0.003
dimethyl ether	288.15	7.7	0.002
dimethyl ether	288.15	6.3	0.001
dimethyl ether	288.15	5.1	0.001
diphenylmethane	470.65	78.83	0.0625
diphenylmethane	470.65	21.84	0.0175
diphenylmethane	425.35	72.27	0.0469
diphenylmethane	425.35	23.37	0.0155
diphenylmethane	425.35	19.73	0.0131
diphenylmethane	373.85	78.73	0.0414
diphenylmethane	373.85	64.12	0.0311
diphenylmethane	373.85	23.79	0.0117
diphenylmethane	373.85	17.41	0.0085
diphenylmethane	324.15	55.26	0.0179
diphenylmethane	324.15	24.47	0.0083
diphenylmethane	324.15	14.98	0.0049
ethane	283.15	193.05	0.3594
ethane	283.15	172.37	0.2447
ethane	283.15	137.89	0.1623
ethane	283.15	68.95	0.0578
ethane	283.15	41.37	0.0163
ethane	283.15	34.47	0.0051
ethane	255.37	283.7	0.2917
ethane	255.37	275.79	0.2785
ethane	255.37	204.9	0.2027
ethane	255.37	160.5	0.1551
ethane	255.37	137.89	0.1245
ethane	255.37	115.6	0.106
ethane	255.37	82.2	0.0696
ethane	255.37	71.4	0.061
ethane	255.37	68.95	0.0551
ethane	255.37	49.3	0.0347
ethane	255.37	38	0.0258
ethane	255.37	34.47	0.0204
ethane	255.37	20.68	0.0072
ethane	240.15	231.7	0.1969
ethane	240.15	144	0.1192
ethane	240.15	78.9	0.0632
ethane	240.15	49.2	0.0344
ethane	240.15	47.9	0.0341
ethane	228.15	214.5	0.1621
ethane	228.15	147.9	0.112
ethane	228.15	70.6	0.0535
ethane	228.15	31.8	0.0219
ethane	227.59	275.79	0.2011
ethane	227.59	137.89	0.098
ethane	227.59	68.95	0.034
ethane	227.59	34.47	0.0168
ethane	223.15	81.06	0.0557
ethane	223.15	60.8	0.0412
ethane	223.15	40.53	0.0257
ethane	223.15	20.27	0.0118
ethane	212.15	191.3	0.1224
ethane	212.15	87.7	0.0565
ethane	212.15	39.4	0.0263
ethane	198.15	81.06	0.0448
ethane	198.15	60.8	0.0319
ethane	198.15	40.53	0.021
ethane	198.15	20.27	0.0108
ethane	189.55	278.5	0.1353
ethane	189.55	227.1	0.1162
ethane	189.55	152	0.0789
ethane	189.55	127.6	0.068
ethane	189.55	98.6	0.0526
ethane	189.55	57.5	0.0325
ethane	185.93	275.79	0.1323
ethane	185.93	137.89	0.0696
ethane	185.93	68.95	0.034
ethane	185.93	34.47	0.0168
ethane	173.15	81.06	0.0336
ethane	173.15	60.8	0.024
ethane	173.15	40.53	0.0168
ethane	173.15	20.27	0.00888
ethane	169.4	245	0.0975
ethane	169.4	143.5	0.0611
ethane	169.4	67.4	0.0292
ethane	149.5	224	0.0685
ethane	149.5	112.3	0.0365
ethane	149.5	51.4	0.0147
ethane	148.15	81.06	0.0221
ethane	148.15	60.8	0.0156
ethane	148.15	40.53	0.0122
ethane	148.15	20.27	0.00618
ethane	144.26	275.79	0.0747
ethane	144.26	137.89	0.0417
ethane	144.26	68.95	0.0218
ethane	144.26	34.47	0.0114
ethane	129.8	284.3	0.0602
ethane	129.8	177.5	0.0402
ethane	129.8	75	0.0173
ethane	107.85	195	0.0267
ethane	107.85	81.7	0.0124
ethane	102.59	275.79	0.0293
ethane	102.59	137.89	0.017
ethane	102.59	68.95	0.0092
ethane	100.15	210.5	0.0242
ethane	100.15	114.4	0.0152
ethane	95.15	295.7	0.0263
ethane	95.15	219.5	0.0213
ethane	95.15	152.3	0.0161
ethane	95.15	129.6	0.0142
ethane	92.5	233.7	0.0209
ethane	92.5	189.6	0.0181
ethane	92.5	139.2	0.0142
ethane	92.5	75.8	0.0072
ethanediol-1,2	373.15	87.4	0.005388
ethanediol-1,2	373.15	87.4	0.005388
ethanediol-1,2	373.15	75	0.004685
ethanediol-1,2	373.15	75	0.004685
ethanediol-1,2	373.15	55.4	0.003471
ethanediol-1,2	373.15	55.4	0.003471
ethanediol-1,2	373.15	39.4	0.002502
ethanediol-1,2	373.15	39.4	0.002502
ethanediol-1,2	323.15	89.7	0.00404
ethanediol-1,2	323.15	89.7	0.00404
ethanediol-1,2	323.15	62.6	0.002878
ethanediol-1,2	323.15	62.6	0.002878
ethanediol-1,2	323.15	48.3	0.00223
ethanediol-1,2	323.15	48.3	0.00223
ethanediol-1,2	323.15	26.8	0.001269
ethanediol-1,2	323.15	26.8	0.001269
ethanediol-1,2	298.15	85.9	0.003273
ethanediol-1,2	298.15	85.9	0.003273
ethanediol-1,2	298.15	69.6	0.002695
ethanediol-1,2	298.15	69.6	0.002695
ethanediol-1,2	298.15	51.5	0.002026
ethanediol-1,2	298.15	51.5	0.002026
ethanediol-1,2	298.15	25.3	0.001003
ethanediol-1,2	298.15	25.3	0.001003
ethanol	508.15	154	0.1883
ethanol	508.15	151.5	0.17
ethanol	508.15	146.8	0.1518
ethanol	508.15	140.7	0.1349
ethanol	508.15	132.6	0.1169
ethanol	503.15	237	0.2999
ethanol	503.15	237	0.342
ethanol	503.15	231.5	0.2533
ethanol	503.15	220	0.2287
ethanol	498.15	282.1	0.2573
ethanol	498.15	244.5	0.2097
ethanol	498.15	201.2	0.1604
ethanol	498.15	155.1	0.1104
ethanol	498.15	102.9	0.05724
ethanol	476.5	82.4	0.0629
ethanol	475.8	90.3	0.0704
ethanol	463.6	82.6	0.0616
ethanol	463.4	74	0.055
ethanol	449.9	66.9	0.0485
ethanol	449.4	74.5	0.054
ethanol	448.15	288.3	0.1322
ethanol	448.15	219.9	0.1005
ethanol	448.15	148.4	0.06655
ethanol	448.15	93	0.03936
ethanol	448.15	55.4	0.02005
ethanol	438.2	61	0.0452
ethanol	426.5	55.7	0.0426
ethanol	411.2	51	0.038
ethanol	400.2	53.2	0.0386
ethanol	398.15	227.2	0.07437
ethanol	398.15	144.2	0.0479
ethanol	398.15	61.2	0.01989
ethanol	395.8	47.1	0.0342
ethanol	375.3	42.8	0.0302
ethanol	373.8	47.8	0.0326
ethanol	352.6	46.4	0.0269
ethanol	348.15	240.3	0.05957
ethanol	348.15	142.3	0.03533
ethanol	348.15	84.6	0.02082
ethanol	348.15	41	0.01051
ethanol	347.7	39.1	0.0237
ethanol	326.8	44.9	0.0204
ethanol	324.2	37	0.0177
ethanol	299.9	43.8	0.0132
ethanol	298.15	292.6	0.05463
ethanol	298.15	233.2	0.04429
ethanol	298.15	174.3	0.03381
ethanol	298.15	116	0.02292
ethanol	298.15	57.2	0.01161
ethanol	291	31.2	0.0067
ethanol	291	25.6	0.0057
ethanol	291	21.8	0.005
ethanol	291	13.9	0.0031
ethyl acetate	291	46	0.0155
ethyl acetate	291	36	0.0123
ethyl acetate	291	26	0.0095
ethyl acetate	291	16	0.0061
ethyl formate	291	41	0.0112
ethyl formate	291	31.1	0.0091
ethyl formate	291	26.1	0.0074
ethyl formate	291	16	0.0051
ethylbenzene	295	173.3	0.0547
ethylbenzene	295	138.8	0.044
ethylbenzene	295	104.4	0.0332
ethylene	310.93	275.79	0.159
ethylene	310.93	275.79	0.1622
ethylene	310.93	275.79	0.1613
ethylene	310.93	275.79	0.1615
ethylene	310.93	137.89	0.0847
ethylene	310.93	137.89	0.0846
ethylene	310.93	137.89	0.085
ethylene	310.93	68.95	0.042
ethylene	310.93	68.95	0.0413
ethylene	310.93	68.95	0.041
ethylene	310.93	68.95	0.0421
ethylene	310.93	34.47	0.0196
ethylene	310.93	34.47	0.0194
ethylene	310.93	34.47	0.0198
ethylene	310.93	34.47	0.0201
ethylene	310.93	17.24	0.0085
ethylene	310.93	17.24	0.0081
ethylene	310.93	17.24	0.0079
ethylene	310.93	17.24	0.0074
ethylene	248.15	40.53	0.0212
ethylene	248.15	30.4	0.00988
ethylene	247.15	280.1	0.357
ethylene	247.15	267.2	0.3292
ethylene	247.15	237.5	0.2739
ethylene	247.15	189.2	0.2045
ethylene	247.15	151.3	0.1551
ethylene	247.15	143.6	0.1455
ethylene	247.15	124.3	0.1205
ethylene	247.15	91.2	0.0817
ethylene	247.15	76.9	0.0648
ethylene	247.15	51.8	0.0354
ethylene	235.15	267.7	0.2554
ethylene	235.15	254	0.2407
ethylene	235.15	213.8	0.1979
ethylene	235.15	203.3	0.1866
ethylene	235.15	182.4	0.1662
ethylene	235.15	136.7	0.1205
ethylene	235.15	128.9	0.1116
ethylene	235.15	84.3	0.0683
ethylene	235.15	53.3	0.0327
ethylene	223.15	81.06	0.0603
ethylene	223.15	60.8	0.0448
ethylene	223.15	40.53	0.0265
ethylene	223.15	20.27	0.00843
ethylene	220.15	274.3	0.2112
ethylene	220.15	207.9	0.1594
ethylene	220.15	146.3	0.1105
ethylene	220.15	126.2	0.0954
ethylene	220.15	92.7	0.0676
ethylene	220.15	74.7	0.0535
ethylene	220.15	48.2	0.032
ethylene	220.15	46.3	0.0306
ethylene	205.15	292.7	0.1843
ethylene	205.15	185.8	0.1191
ethylene	205.15	92.7	0.0596
ethylene	205.15	48.5	0.0297
ethylene	198.15	81.06	0.0489
ethylene	198.15	60.8	0.037
ethylene	198.15	40.53	0.0207
ethylene	198.15	20.27	0.01
ethylene	189.55	201.3	0.0998
ethylene	189.55	118.6	0.0655
ethylene	175.15	272.3	0.1123
ethylene	175.15	172.4	0.0682
ethylene	173.15	81.06	0.0361
ethylene	173.15	60.8	0.0281
ethylene	173.15	40.53	0.0164
ethylene	173.15	20.27	0.00865
ethylene	166.15	215.8	0.0786
ethylene	158.15	299.1	0.0957
ethylene	158.15	154.1	0.0533
ethylene	148.15	81.06	0.0266
ethylene	148.15	60.8	0.0185
ethylene	148.15	40.53	0.0131
ethylene	148.15	20.27	0.00743
ethylene	123.15	81.06	0.0146
ethylene	123.15	60.8	0.0127
ethylene	123.15	40.53	0.00932
ethylene	123.15	20.27	0.00531
ethylene	114.15	185.9	0.0249
ethylene glycol dimethyl ether	373.15	97.3	0.05473
ethylene glycol dimethyl ether	373.15	79.6	0.04501
ethylene glycol dimethyl ether	373.15	45.16	0.02583
ethylene glycol dimethyl ether	373.15	22.19	0.0128
ethylene glycol dimethyl ether	373.15	21.27	0.01183
ethylene glycol dimethyl ether	323.15	98.2	0.04028
ethylene glycol dimethyl ether	323.15	70.8	0.02947
ethylene glycol dimethyl ether	323.15	49.16	0.02085
ethylene glycol dimethyl ether	323.15	44.79	0.0188
ethylene glycol dimethyl ether	323.15	17.82	0.007757
ethylene glycol dimethyl ether	323.15	17.07	0.007352
ethylene glycol dimethyl ether	298.15	95.3	0.03272
ethylene glycol dimethyl ether	298.15	74.3	0.0257
ethylene glycol dimethyl ether	298.15	45.82	0.01623
ethylene glycol dimethyl ether	298.15	11.59	0.004189
fluoroheptane	308.15	1.01	0.001492
fluoroheptane	298.15	1.01	0.0014007
fluoroheptane	285.25	1.01	0.0012922
fluoroheptane	273.15	1.01	0.0011927
fluoroheptane	248.15	1.01	0.0010037
furan	402	139.5	0.0805
furan	402	127.3	0.0727
furan	402	106.5	0.059
furan	402	80.3	0.0426
furan	402	38.9	0.0144
furan	371.5	132.2	0.062
furan	371.5	121.6	0.0569
furan	371.5	96.8	0.0433
furan	371.5	73	0.0317
furan	342.5	149.3	0.0554
furan	342.5	119.4	0.0439
furan	342.5	100.8	0.036
furan	342.5	88.5	0.0332
furan	342.5	52.1	0.0174
furfural	476.1	124.5	0.0381
furfural	476.1	99.5	0.0305
furfural	476.1	69.6	0.0229
furfural	423.15	265.65	0.068
furfural	423.15	232.58	0.0633
furfural	423.15	222.91	0.0596
furfural	423.15	211.23	0.0565
furfural	423.15	151.23	0.0418
furfural	423.15	139.9	0.0396
furfural	423.15	128.86	0.037
furfural	423.15	111.37	0.0315
furfural	423.15	108.82	0.0325
furfural	423.15	107.01	0.0286
furfural	423.15	70.17	0.0211
furfural	423.15	68.95	0.0201
furfural	423.15	67.02	0.0203
furfural	423.15	54.47	0.0164
furfural	399.2	124.4	0.029
furfural	399.2	99.5	0.0229
furfural	399.2	69.7	0.0154
furfural	399.15	252.54	0.0568
furfural	399.15	206.83	0.0476
furfural	399.15	201.34	0.0464
furfural	399.15	196.7	0.0461
furfural	399.15	173.12	0.0408
furfural	399.15	165.03	0.0373
furfural	399.15	155.98	0.0365
furfural	399.15	143.55	0.0319
furfural	399.15	114.8	0.0271
furfural	399.15	111.4	0.027
furfural	399.15	87.33	0.0228
furfural	399.15	84.15	0.0206
furfural	399.15	64.9	0.0158
furfural	399.15	63.7	0.0158
furfural	323.8	121.32	0.0611
furfural	323.8	108.95	0.0572
furfural	323.8	101.44	0.0541
furfural	323.15	250.88	0.037
furfural	323.15	242.6	0.0345
furfural	323.15	227.15	0.0332
furfural	323.15	188.65	0.0291
furfural	323.15	182.66	0.0268
furfural	323.15	150.78	0.0243
furfural	323.15	108.9	0.0164
furfural	323.15	78.43	0.0135
furfural	323.15	54.14	0.0094
furfural	323.15	52.86	0.0086
furfural	323.15	51.11	0.009
furfural	323.1	124.5	0.0138
furfuryl alcohol	423.15	260.48	0.0617
furfuryl alcohol	423.15	240.02	0.0558
furfuryl alcohol	423.15	204.67	0.0496
furfuryl alcohol	423.15	198.48	0.0467
furfuryl alcohol	423.15	194.19	0.0459
furfuryl alcohol	423.15	162.25	0.0384
furfuryl alcohol	423.15	159.12	0.0368
furfuryl alcohol	423.15	154.34	0.0362
furfuryl alcohol	423.15	104.82	0.0257
furfuryl alcohol	423.15	102.11	0.0254
furfuryl alcohol	423.15	61.36	0.0158
furfuryl alcohol	423.15	54.68	0.0134
furfuryl alcohol	423.15	51.97	0.0116
furfuryl alcohol	373.15	259.05	0.044
furfuryl alcohol	373.15	249.49	0.0419
furfuryl alcohol	373.15	211.5	0.0384
furfuryl alcohol	373.15	206.98	0.037
furfuryl alcohol	373.15	199.13	0.0351
furfuryl alcohol	373.15	159.4	0.0289
furfuryl alcohol	373.15	155.74	0.0274
furfuryl alcohol	373.15	114.45	0.0215
furfuryl alcohol	373.15	113.11	0.0204
furfuryl alcohol	373.15	107.29	0.0202
furfuryl alcohol	373.15	62.96	0.0117
furfuryl alcohol	373.15	61.54	0.0115
furfuryl alcohol	323.15	263.48	0.0334
furfuryl alcohol	323.15	257	0.0319
furfuryl alcohol	323.15	215.3	0.0269
furfuryl alcohol	323.15	200.96	0.026
furfuryl alcohol	323.15	196.8	0.0255
furfuryl alcohol	323.15	182.19	0.0234
furfuryl alcohol	323.15	160.33	0.0211
furfuryl alcohol	323.15	154.86	0.0201
furfuryl alcohol	323.15	150.38	0.0194
furfuryl alcohol	323.15	117.47	0.0153
furfuryl alcohol	323.15	107.67	0.0144
furfuryl alcohol	323.15	58.18	0.0084
furfuryl alcohol	323.15	55.55	0.0076
furfuryl alcohol	323.15	53.57	0.0069
guaiacol	424.65	78.31	0.0422
guaiacol	424.53	146.6	0.0808
guaiacol	423.98	84.87	0.0435
guaiacol	423.35	69.04	0.0395
guaiacol	422.78	62	0.035
guaiacol	422.67	68.28	0.0371
guaiacol	422.17	153.91	0.0816
guaiacol	421.73	120.5	0.068
guaiacol	421.65	118.5	0.0625
guaiacol	421.51	144.14	0.0745
guaiacol	421.22	99.12	0.0552
guaiacol	421.15	57.5	0.034
guaiacol	421.11	106.9	0.0563
guaiacol	421.05	59.84	0.0348
guaiacol	420.65	49.35	0.0289
guaiacol	374.94	119.33	0.047
guaiacol	374.85	133.38	0.0523
guaiacol	373.83	71.21	0.0312
guaiacol	373.75	60.65	0.0255
guaiacol	373.7	78.05	0.031
guaiacol	373.7	68.25	0.0278
guaiacol	373.23	95.59	0.0412
guaiacol	373.02	106.95	0.0424
guaiacol	372.85	64.5	0.0275
guaiacol	372.59	60.2	0.0245
guaiacol	372.57	57.23	0.0236
guaiacol	371.58	91.92	0.0384
guaiacol	371.52	164.32	0.0634
guaiacol	370.39	125.65	0.0509
guaiacol	370.35	122.24	0.0468
guaiacol	370.34	143.74	0.0576
guaiacol	326.21	123.18	0.0429
guaiacol	324.5	178.38	0.0613
guaiacol	324.22	150.2	0.0488
guaiacol	324.05	160.5	0.0561
guaiacol	323.35	50	0.0184
guaiacol	323.3	52.02	0.0187
guaiacol	323.12	72.31	0.0249
guaiacol	322.95	75.5	0.027
guaiacol	322.51	110.28	0.0355
guaiacol	322.11	68.51	0.0222
guaiacol	322.01	58.52	0.0203
guaiacol	322	62.28	0.0212
guaiacol	321.65	80.76	0.0282
guaiacol	321.63	96.89	0.0309
guaiacol	321.52	142.48	0.0449
guaiacol	321.52	137.78	0.0439
guaiacol	321.47	204.83	0.0674
methane	183.12	75.39	0.1487
methane	183.12	74.33	0.1257
methane	183.12	74.12	0.1269
methane	183.12	73.42	0.1234
methane	183.12	71.05	0.1084
methane	183.12	69.02	0.0994
methane	183.12	63.43	0.0734
methane	183.12	63.09	0.074
methane	183.12	56.19	0.0529
methane	183.12	49.26	0.0328
methane	183.12	44.88	0.0203
methane	183.12	43.44	0.0173
methane	183.12	41.99	0.0117
methane	183.12	40.16	0.0107
methane	183.12	40.16	0.0107
methane	183.12	39.16	0.0068
methane	180	86.7	0.181
methane	180	83.3	0.1517
methane	180	77.7	0.1241
methane	180	72.1	0.1023
methane	180	67.3	0.0873
methane	180	61.9	0.07
methane	180	58	0.0589
methane	180	53	0.046
methane	180	47.6	0.0332
methane	173.65	108.32	0.225
methane	173.65	103.35	0.205
methane	173.65	100.51	0.19
methane	173.65	83.8	0.131
methane	173.65	81.67	0.124
methane	173.65	71.03	0.0938
methane	173.65	60.69	0.0709
methane	173.65	40.63	0.0257
methane	173.65	35.67	0.0168
methane	173.25	114.83	0.2623
methane	173.25	114	0.2487
methane	173.25	110.32	0.2272
methane	173.25	103.42	0.1941
methane	173.25	97.56	0.1685
methane	173.25	83.74	0.1358
methane	173.25	69.95	0.0973
methane	173.25	62.05	0.0745
methane	173.25	55.33	0.059
methane	173.25	49.06	0.0442
methane	173.25	42.37	0.0327
methane	173.25	36.44	0.0196
methane	173.25	30.64	0.0087
methane	172.05	103.55	0.201
methane	172.05	87.54	0.136
methane	172.04	103.42	0.1622
methane	172.04	88.25	0.1255
methane	172.04	68.95	0.0877
methane	172.04	34.47	0.017
methane	170	128.2	0.2933
methane	170	125.8	0.2702
methane	170	117.9	0.2275
methane	170	111.4	0.2066
methane	170	97.8	0.1617
methane	170	85.6	0.1307
methane	170	71	0.0949
methane	170	57.6	0.0662
methane	170	44.4	0.0405
methane	170	37.4	0.0271
methane	163.17	159.58	0.38
methane	163.17	158.89	0.3661
methane	163.17	155.44	0.3283
methane	163.17	151.99	0.3095
methane	163.17	138.2	0.2506
methane	163.17	125.11	0.2155
methane	163.17	111.32	0.1802
methane	163.17	97.53	0.1495
methane	163.17	83.74	0.1222
methane	163.17	69.95	0.097
methane	163.17	56.16	0.0688
methane	163.17	40.4	0.0403
methane	163.17	28.72	0.0188
methane	163.17	24.44	0.0111
methane	163.17	21.68	0.0063
methane	159.2	173.2	0.3629
methane	159.2	166.4	0.3238
methane	159.2	160.6	0.3006
methane	159.2	152.7	0.2725
methane	159.2	140.3	0.2364
methane	159.2	127.9	0.2059
methane	159.2	117.5	0.1838
methane	159.2	104.3	0.1569
methane	159.2	87.1	0.1231
methane	159.2	62.6	0.0793
methane	159.2	50.7	0.0582
methane	159.2	36.8	0.0355
methane	159.2	28.4	0.0204
methane	159.2	24.3	0.0146
methane	153.21	207.19	0.4434
methane	153.21	205.12	0.4131
methane	153.21	202.71	0.3964
methane	153.21	198.91	0.3773
methane	153.21	190.99	0.3385
methane	153.21	172.37	0.2843
methane	153.21	155.13	0.2425
methane	153.21	137.89	0.2071
methane	153.21	117.21	0.1674
methane	153.21	103.42	0.1417
methane	153.21	89.63	0.1202
methane	153.21	82.74	0.1067
methane	153.21	75.91	0.0974
methane	153.21	63.74	0.0795
methane	153.21	62.05	0.0744
methane	153.21	52.37	0.0622
methane	153.21	41.37	0.0443
methane	153.21	41.37	0.0446
methane	153.21	36.16	0.0357
methane	150	224.1	0.4708
methane	150	215.9	0.3985
methane	150	209	0.3695
methane	150	202.1	0.3449
methane	150	177.7	0.2782
methane	150	153.8	0.2305
methane	150	125.2	0.1784
methane	150	97	0.1311
methane	150	84.7	0.1102
methane	150	70.1	0.0871
methane	150	55.8	0.0657
methane	150	42.6	0.0468
methane	150	32.2	0.0325
methane	150	15.5	0.0089
methane	144.26	206.84	0.3499
methane	144.26	137.21	0.1805
methane	144.26	102.73	0.131
methane	144.26	68.95	0.0781
methane	144.26	34.47	0.0343
methane	143.48	263.03	0.4892
methane	143.48	258.65	0.4608
methane	143.48	241.32	0.3788
methane	143.48	224.08	0.3327
methane	143.48	206.84	0.2983
methane	143.48	172.37	0.2366
methane	143.48	137.89	0.1794
methane	143.48	103.42	0.1283
methane	143.48	86.18	0.1067
methane	143.48	82.74	0.1019
methane	143.48	68.91	0.0842
methane	143.48	55.26	0.0657
methane	143.48	41.54	0.0461
methane	143.48	34.51	0.0366
methane	143.48	13.86	0.0079
methane	143.05	101.53	0.127
methane	143.05	79.74	0.0992
methane	143.05	59.88	0.0684
methane	143.05	40.73	0.0477
methane	143.05	20.16	0.0168
methane	143.05	10.74	0.0031
methane	140	278.5	0.4751
methane	140	258.3	0.3923
methane	140	229.5	0.3242
methane	140	211.7	0.2912
methane	140	202.4	0.2746
methane	140	172.8	0.2278
methane	140	139	0.178
methane	140	111.5	0.1386
methane	140	83.3	0.0998
methane	140	56.6	0.0635
methane	140	42.6	0.0464
methane	140	28.9	0.0285
methane	140	18.5	0.0152
methane	140	15.9	0.0124
methane	133.14	275.8	0.3565
methane	133.14	241.32	0.2959
methane	133.14	207.39	0.2385
methane	133.14	172.37	0.1972
methane	133.14	137.55	0.1488
methane	133.14	96.42	0.1068
methane	133.14	69.53	0.0776
methane	133.14	68.6	0.0738
methane	133.14	55.19	0.0604
methane	133.14	41.4	0.0436
methane	133.14	35.51	0.0376
methane	133.14	27.54	0.0268
methane	130	276.3	0.3295
methane	130	244.1	0.2834
methane	130	209.7	0.2386
methane	130	152.6	0.1719
methane	130	124.9	0.1394
methane	130	97.5	0.107
methane	130	69.9	0.0748
methane	130	56.6	0.0602
methane	130	42	0.0444
methane	130	28.7	0.0289
methane	130	21.7	0.0212
methane	130	14.8	0.0139
methane	130	8.1	0.0053
methane	123.15	101.83	0.101
methane	123.15	81.77	0.0816
methane	123.15	60.59	0.0616
methane	123.15	40.33	0.0385
methane	123.15	20.27	0.0192
methane	123.15	10.23	0.0073
methane	123.05	206.15	0.2146
methane	123.05	172.02	0.1724
methane	123.05	138.58	0.1402
methane	123.05	138.45	0.1411
methane	123.05	103.42	0.1037
methane	123.05	86.18	0.0841
methane	123.05	68.95	0.0691
methane	123.05	68.95	0.0693
methane	123.05	58.95	0.0611
methane	123.05	55.16	0.0554
methane	123.05	45.16	0.0439
methane	120	278.2	0.2693
methane	120	242.1	0.2332
methane	120	209.4	0.2027
methane	120	175.3	0.171
methane	120	139.5	0.1362
methane	120	122.2	0.1204
methane	120	95.4	0.0942
methane	120	72	0.0702
methane	120	56.5	0.0549
methane	120	35.8	0.0345
methane	120	21.8	0.0206
methane	120	15.1	0.0138
methane	120	11.3	0.0101
methane	120	7.9	0.0062
methane	118.19	206.84	0.1925
methane	118.19	206.5	0.1941
methane	118.19	172.37	0.1611
methane	118.19	138.24	0.1304
methane	118.19	103.42	0.0975
methane	118.19	69.22	0.0662
methane	118.19	55.43	0.0518
methane	118.19	41.71	0.0386
methane	116.48	275.79	0.317
methane	116.48	158.58	0.1394
methane	116.48	102.73	0.095
methane	116.48	33.78	0.0318
methane	113.14	284.06	0.2335
methane	113.14	246.14	0.2074
methane	113.14	206.84	0.1792
methane	113.14	172.71	0.1485
methane	113.14	137.34	0.1189
methane	113.14	103.56	0.09
methane	113.14	85.91	0.0752
methane	113.14	69.09	0.0594
methane	113.14	55.3	0.0459
methane	113.14	41.64	0.0352
methane	113.14	28.2	0.024
methane	110	276.4	0.2164
methane	110	208.6	0.1684
methane	110	173.4	0.1417
methane	110	139.7	0.1153
methane	110	90.7	0.078
methane	110	77.8	0.0672
methane	110	63.7	0.0556
methane	110	49.8	0.0442
methane	110	35.6	0.0318
methane	110	28.2	0.0252
methane	110	21.8	0.0198
methane	110	18.3	0.0165
methane	110	14.9	0.0136
methane	110	11.1	0.0096
methane	110	7.8	0.0068
methane	110	5.8	0.0046
methane	110	4.5	0.0032
methane	110	3.4	0.0021
methane	108.13	204.74	0.1591
methane	108.13	170.3	0.1345
methane	108.13	137.89	0.1056
methane	108.13	96.53	0.0762
methane	108.13	85.7	0.0684
methane	108.13	78.94	0.0622
methane	108.13	69.29	0.0546
methane	108.13	55.36	0.0435
methane	108.13	41.79	0.0327
methane	108.13	35.85	0.028
methane	103.15	91.19	0.0819
methane	103.15	81.97	0.0708
methane	103.15	61.2	0.0569
methane	103.15	41.34	0.0337
methane	103.15	19.96	0.0142
methane	100	277.1	0.1755
methane	100	243.5	0.1579
methane	100	209.1	0.1396
methane	100	173.2	0.1162
methane	100	139.4	0.0965
methane	100	104.2	0.0753
methane	100	70.4	0.053
methane	100	56.3	0.0436
methane	100	49.2	0.0388
methane	100	42.3	0.0331
methane	100	35.6	0.0283
methane	100	28.6	0.023
methane	100	19.6	0.0163
methane	100	16.7	0.014
methane	100	14	0.0116
methane	100	11.2	0.0094
methane	100	7.7	0.0063
methane	100	6.7	0.0055
methane	100	6	0.005
methane	100	5.1	0.0041
methane	92.3	278.7	0.1416
methane	92.3	208.3	0.1134
methane	92.3	174.7	0.0988
methane	92.3	139.1	0.0826
methane	92.3	104.2	0.0647
methane	92.3	70.2	0.0461
methane	92.3	56.3	0.0382
methane	92.3	42.2	0.0293
methane	92.3	35.6	0.0251
methane	92.3	28.7	0.0209
methane	92.3	21.8	0.0163
methane	92.3	18.3	0.014
methane	92.3	14.8	0.0113
methane	92.3	11.4	0.0085
methane	92.3	7.9	0.006
methane	92.3	6.5	0.005
methane	92.3	5.9	0.0044
methane	92.3	5.2	0.004
methane	92.3	4.5	0.0035
methane	92.3	3.8	0.0031
methane	92.3	3.1	0.0023
methane	92.3	2.2	0.0018
methanol	476.6	109.8	0.0525
methanol	475.3	104.4	0.0498
methanol	460.7	96.8	0.0431
methanol	458.9	91.1	0.0412
methanol	450.8	88.9	0.0388
methanol	448.6	83.8	0.0371
methanol	438.9	78.1	0.0339
methanol	437.5	80.3	0.0341
methanol	425.3	72	0.0298
methanol	424.6	74.5	0.0302
methanol	415.2	68.6	0.0281
methanol	414.5	67.3	0.0271
methanol	413.45	10.71	0.00634
methanol	402.25	11.86	0.00437
methanol	400.7	64.4	0.0245
methanol	395.8	60	0.0233
methanol	392.85	11.91	0.00376
methanol	385.4	58.3	0.0219
methanol	382.95	11.41	0.00374
methanol	374.2	53.9	0.0195
methanol	374.05	16.59	0.00433
methanol	374.05	11.42	0.00327
methanol	373.95	5.96	0.00219
methanol	373.9	55	0.0201
methanol	373.15	253	0.05542
methanol	373.15	189.5	0.04228
methanol	373.15	128	0.0285
methanol	373.15	95.3	0.02126
methanol	373.15	64.8	0.01429
methanol	373.15	34.4	0.0072
methanol	372.5	54.3	0.02
methanol	363.55	11.36	0.00274
methanol	363.55	5.94	0.00188
methanol	363.45	16.28	0.00378
methanol	358.5	50	0.0174
methanol	354.15	5.86	0.00167
methanol	353.15	10.89	0.00262
methanol	353.05	15.42	0.00375
methanol	348.2	47.8	0.0161
methanol	348.15	122.6	0.0256
methanol	348.15	85.11	0.0184
methanol	347.6	50	0.0158
methanol	344.95	5.82	0.00142
methanol	343.45	15.18	0.0034
methanol	342.45	10.56	0.00235
methanol	335.15	5.67	0.00134
methanol	333.65	14.68	0.00308
methanol	333.05	10.24	0.00215
methanol	324.7	45.6	0.012
methanol	323.8	47.8	0.0116
methanol	323.45	14.25	0.00285
methanol	323.25	5.5	0.00113
methanol	323.15	266	0.04484
methanol	323.15	177	0.03056
methanol	323.15	86.4	0.01519
methanol	323.15	61.2	0.01073
methanol	323.15	44	0.00773
methanol	322.85	9.96	0.00193
methanol	314.4	44.9	0.0102
methanol	314.25	14.07	0.00249
methanol	313.95	5.36	0.00103
methanol	313.35	9.67	0.00175
methanol	308.2	34.27	0.00619
methanol	308.2	26.35	0.00484
methanol	308.2	13.83	0.0026
methanol	308.2	7.52	0.00134
methanol	308.15	110	0.0211
methanol	308.15	90	0.0173
methanol	308.15	70	0.0135
methanol	308.15	50	0.01
methanol	308.15	30	0.0067
methanol	308.15	20	0.0037
methanol	303.95	9.36	0.00159
methanol	303.65	5.17	0.00092
methanol	302.15	13.26	0.00219
methanol	299.65	13.37	0.00212
methanol	298.15	212.5	0.032
methanol	298.15	166	0.1007
methanol	298.15	110.1	0.0203
methanol	298.15	104.5	0.01637
methanol	298.15	90	0.0163
methanol	298.15	69.93	0.0134
methanol	298.15	50.8	0.00809
methanol	298.15	50.14	0.0101
methanol	298.15	30	0.0067
methanol	298.15	20	0.0035
methanol	297.55	151.99	0.0253
methanol	296.35	9.15	0.0015
methanol	296.25	5.06	0.00079
methanol	291.2	31.04	0.00477
methanol	291.2	25.14	0.00375
methanol	291.2	12.92	0.00196
methanol	291.2	4.33	0.0007
methanol	291	48.5	0.0055
methanol	291	45.5	0.0052
methanol	291	43.2	0.0049
methanol	291	36.2	0.0061
methanol	291	33.1	0.0038
methanol	291	31	0.0052
methanol	291	27.9	0.0032
methanol	291	27.1	0.0031
methanol	291	26.1	0.0045
methanol	291	26	0.0044
methanol	291	21.9	0.0037
methanol	291	20.8	0.0035
methanol	291	18.1	0.0031
methanol	291	17.6	0.0021
methanol	291	17	0.0028
methanol	291	16.4	0.0019
methanol	291	16	0.0026
methanol	291	15.1	0.0025
methanol	291	11	0.0018
methanol	288.15	110.2	0.0192
methanol	288.15	89.81	0.0152
methanol	288.15	69.73	0.0126
methanol	288.15	50	0.0098
methanol	288.15	30	0.0057
methanol	288.15	20	0.0034
methanol	278.15	110	0.0182
methanol	278.15	90	0.0153
[truncated: 1,807 more rows]
